# Supplementary material
Source: PubMed Central journal article supplement (PMC6791741)

Total Syntheses of Xiamycins A, C, F, H and Oridamycin A and Preliminary Evaluation of  
their Anti-Fungal Properties

Magnus Pfaffenbach,<sup>Π</sup> Ian Bakanas,<sup>Π</sup> Nicholas O'Connor,<sup>Π, †</sup> Jessica L Herrick,<sup>Υ</sup>  
Richmond Sarpong<sup>Π,\*</sup>

<sup>Π</sup>University of California, Department of Chemistry,  
Latimer Hall, 94720 Berkeley

<sup>Υ</sup> Corteva AgriScience, Crop Protection Group  
Zionsville, IN 46077

**Contents:**

- S2-S33:** Experimental Procedures and Spectroscopic Data
- S34-S42:** Chemical Shift Tables for Natural and Synthetic Xiamycin A, C, F, H, and  
Oridamycin A  
Chemical Shift Tables for Sarpong's and Omura/Nagamitsu's *trans*-diol
- S43-44:** Fungitoxicity assessment
- S44:** References
- S45-S53:** Crystallographic Data of *trans* diol **31** and *syn* diol **39**
- S54-88:** Spectra

## 1. Experimental Procedures and Spectroscopic Data

Unless otherwise stated, all reactions were performed in oven-dried glassware under a nitrogen atmosphere. Reagents were used as received from their commercial supplier. Dry solvents (THF, PhMe, PhH, MeCN, Et<sub>2</sub>O, MeOH, NEt<sub>3</sub>) were obtained from a JC Meyer Phoenix SDS Solvent System, methylene chloride (DCM) and diisopropylamine (DIPA) were freshly distilled from calcium hydride prior to use. Thin layer chromatography was performed on Merck KGaA TLC Silica gel 60 F<sub>254</sub> plates visualized by UV light (254 nm/366 nm) and stained with *p*-anisaldehyde, KMnO<sub>4</sub>, or ceric ammonium molybdate (CAM). Products were purified by flash column chromatography on silica gel (0.040 – 0.063 mm) or by a Yamazen Smart Flash EPCLC W-Prep 2XY (dual channel) automated flash chromatography system on prefilled, premium, universal columns using ACS grade solvents.

NMR spectra were recorded on Bruker AVB-400 (supported by NSF Grant CHE-0130862), DRX-500 (supported by NIH grant RR 02424A-01, NSF Grant CHE 82-08992 and CHE 9633007), AV-500 (supported by NIH Grant 1S10RR016634-01), AV-600 (supported by NIH Grant SRR023679A) or AV-700 MHz instruments. Chemical shifts for <sup>1</sup>H NMR are reported as  $\delta$  (parts per million) relative to the residual signals of CDCl<sub>3</sub> at 7.26 ppm, methanol-*d*<sub>4</sub> at 3.31 ppm or benzene C<sub>6</sub>D<sub>6</sub> at 7.16. Chemical shifts for <sup>13</sup>C NMR are reported as  $\delta$  (parts per million) relative to the signal of CDCl<sub>3</sub> at 77.16 ppm, methanol-*d*<sub>4</sub> at 49.00 ppm or benzene C<sub>6</sub>D<sub>6</sub> at 128.06. The following abbreviations are used to describe splitting patterns: br = broad, s = singlet, d = doublet, t = triplet, q = quartet, qui = quintet, sept = septet, m = multiplet. Coupling constants *J* are given in Hertz. Irradiation of reaction mixtures was performed using a Luzchem photobox (UVB/310 nm: LZC lamps; UVA/350 nm: Hitachi FL8BL-B lamps), a Kessil A160WE blue LED lamp, or a Sunlite tungsten halogen lamp (600W).

Mass spectra were recorded at the QB3/Chemistry Mass Spectrometry Facility at the University of California, Berkeley, on a Finnigan/Thermo LTQ-FT instrument (ESI), and the data acquired and processed using the Xcalibur<sup>TM</sup> software.

IR spectroscopic data were recorded on a Bruker ALPHA FT-IR spectrometer and reported in [cm<sup>-1</sup>]. Samples are loaded onto the diamond surface either neat or as a solution in organic solvent and the data acquired after the solvent had evaporated.

X-Ray data were collected on a Bruker APEX-II CCD diffractometer with Mo-K $\alpha$  radiation ( $\lambda = 0.71073 \text{ \AA}$ ) or a MicroStar-H X8 APEX-II diffractometer with Cu-K $\alpha$  radiation ( $\lambda = 1.54178 \text{ \AA}$ ). CYLview was used for graphic rendering.

UV-Vis experiments were performed on a Agilent Cary 60 Spectrophotometer using a dual beam mode between 800 and 200 nm.

## Graphical Overview

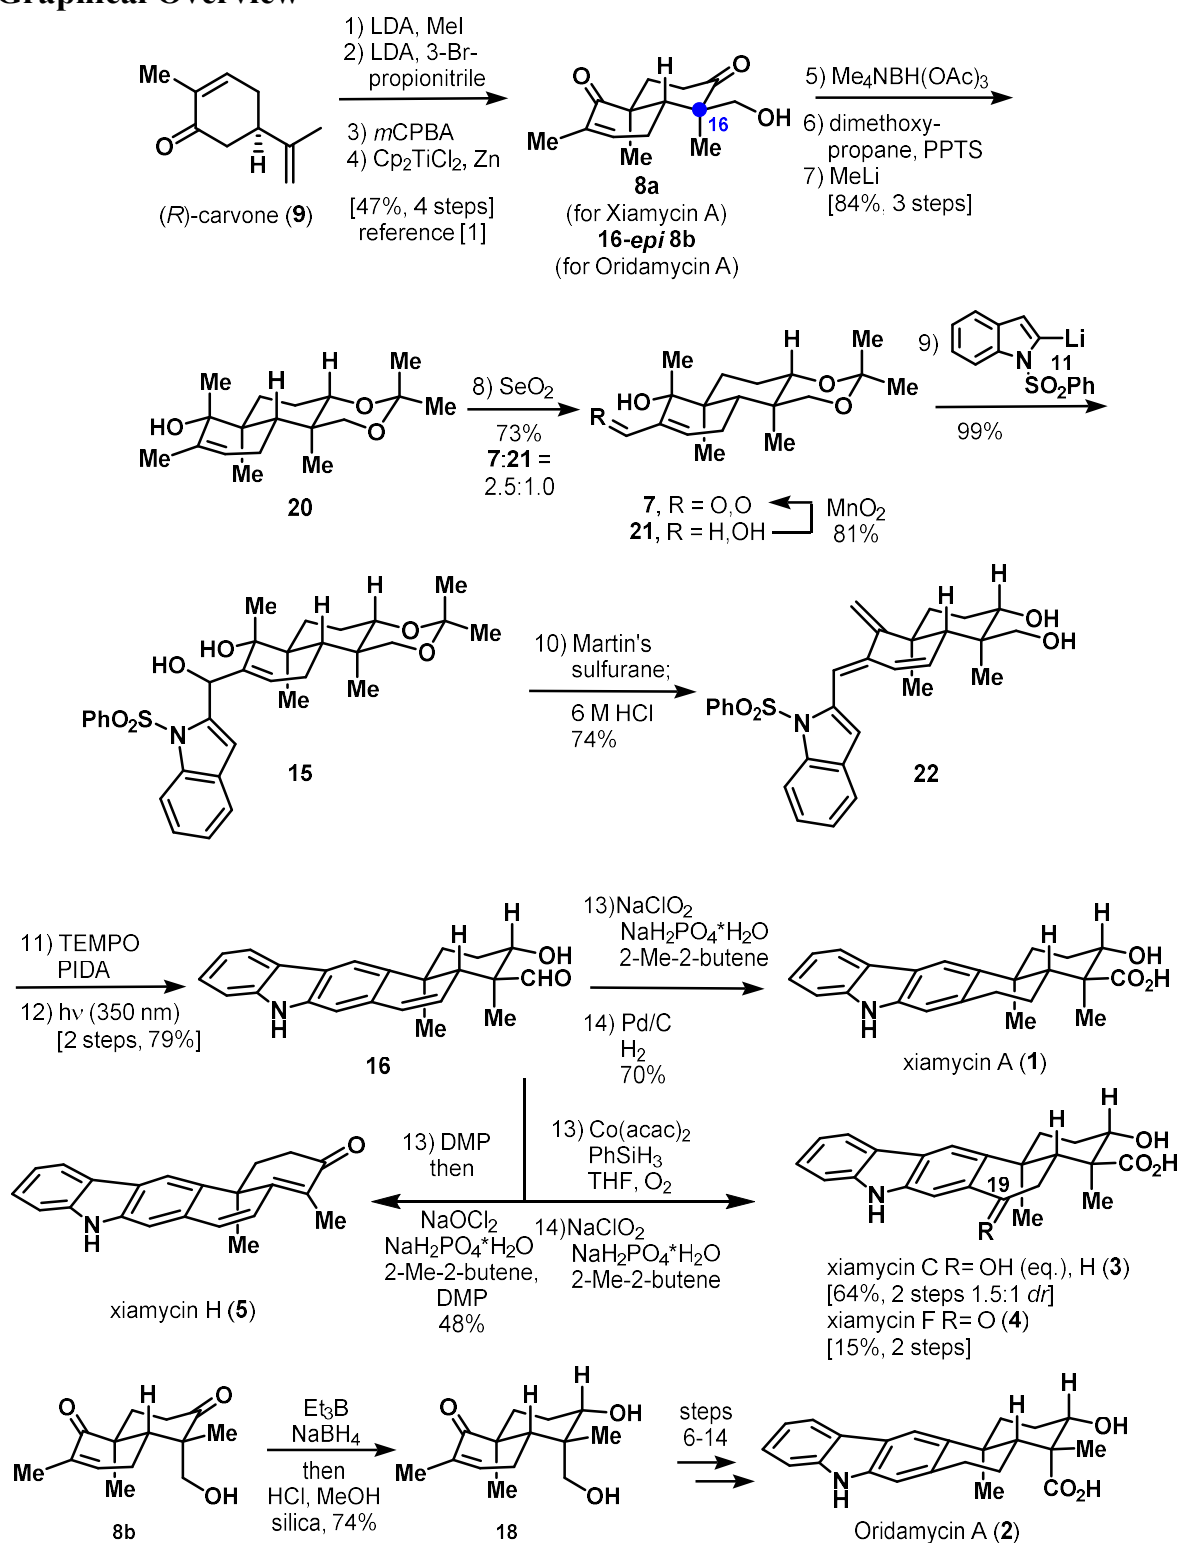

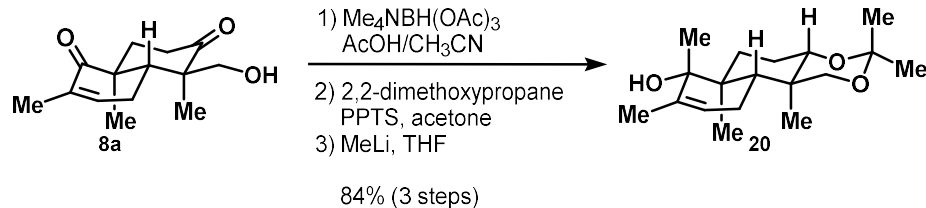

**(4a*S*,5*R*,6*S*,8a*S*)-6-Hydroxy-5-(hydroxymethyl)-2,5,8a-trimethyl-4a,5,6,7,8,8a-hexahydro naphthalen-1(4*H*)-one (10):** To a solution of  $\text{Me}_4\text{NBH}(\text{OAc})_3$  (10.2 g of >90% pure Acros material, 34.9 mmol, 5.50 equiv) in 22.5 mL of MeCN (0.280 M) was added 22.5 mL of glacial AcOH (0.280 M) under  $\text{N}_2$ , and the resulting colorless solution was stirred 30 min at room temperature, after which time it was added via cannula to a stirring solution of ketone **8a** (1.50 g, 6.35 mmol, 1.00 equiv) dissolved in 22.5 mL MeCN at room temperature. The clear solution was stirred for 3 h at room temperature and then quenched by addition of sat. aq. Rochelle's salt solution. The resulting milky biphasic mixture was diluted with EtOAc and vigorously stirred for 1 h. A solution of sat. aq.  $\text{NaHCO}_3$  was carefully added while stirring. After the gas evolution ceased, the aq. layer was extracted four times with EtOAc, washed three times with sat. aq.  $\text{NaHCO}_3$ , followed by sat. aq.  $\text{NaCl}$  solution and dried over  $\text{MgSO}_4$ . This material was used in the next reaction without further purification. An analytical sample was prepared by flash column chromatography (PE:EtOAc = 1:1) to afford diol **10** as a white solid. Suitable crystals for X-ray analysis were obtained after crystallization from a Hexane/EtOAc (1:1) solution.

**(4a*S*,6a*S*,10a*S*,10b*R*)-3,3,6a,8,10b-Pentamethyl-1,4a,5,6,6a,10,10a,10b-octahydro-7*H*-naphtho[2,1-*d*][1,3]dioxin-7-one (23):** To a solution of crude diol in acetone (80.0 mL, 80.0 mM) was added PPTS (399 mg, 1.58 mmol, 0.250 equiv), followed by 2,2-dimethoxypropane (7.90 mL, 63.5 mmol, 10.0 equiv) at room temperature. After stirring for 14 h, the reaction mixture was quenched by the addition of sat. aq.  $\text{NaHCO}_3$ . The aq. layer was extracted three times with EtOAc, washed with sat. aq.  $\text{NaCl}$  solution and dried over  $\text{MgSO}_4$ . After removal of the solvent *in vacuo*, this material was used in the next reaction without further purification. An analytical sample was prepared by flash column chromatography (PE:EtOAc = 3:1) to afford acetonide **23** as a white solid.

**(4a*S*,6a*S*,7*S*,10a*S*,10b*R*)-3,3,6a,7,8,10b-Hexamethyl-4a,5,6,6a,7,10,10a,10b-octahydro-*H*-naphtho[2,1-*d*][1,3]dioxin-7-ol (20):**  $\text{MeLi}$  (8.70 mL of a 1.60 M  $\text{Et}_2\text{O}$  solution, 14.0 mmol,

2.20 equiv) was added dropwise to a solution of the crude acetonide in THF (63.0 mL, 0.100 M) at  $-78$  °C. After being stirred for 1.5 h at  $-78$  °C, the reaction mixture was quenched by the addition of sat. aq.  $\text{NH}_4\text{Cl}$ . The aq. layer was extracted three times with EtOAc, washed with sat. aq. NaCl solution and dried over  $\text{MgSO}_4$ . After removal of the solvent *in vacuo*, the residue was purified by gradient flash chromatography (Yamazen, eluting with 13-34% EtOAc in hexanes) to afford 1.56 g (84%, over 3 steps) of alcohol **20** as a white solid.

**(4a*S*,5*R*,6*S*,8a*S*)-6-Hydroxy-5-(hydroxymethyl)-2,5,8a-trimethyl-4a,5,6,7,8,8a-hexahydro naphthalen-1(4*H*)-one (10):**

$[\alpha]_{\text{D}}^{22}$   $-21.4$  ( $c = 1.00$ , MeOH); lit.<sup>1</sup>  $[\alpha]_{\text{D}}^{27}$   $-20.3$  ( $c = 1.00$ , MeOH)

$^1\text{H-NMR}$  (600 MHz,  $\text{CDCl}_3$ ):  $\delta = 6.64$  (d,  $J = 4.8$  Hz, 1H), 3.68-3.58 (m, 2H), 3.39 (d,  $J = 10.6$  Hz, 1H), 3.04 (br s, 2H), 2.39-2.29 (m, 1H), 2.18 (d,  $J = 19.1$  Hz, 1H), 1.91 (d,  $J = 14.3$  Hz, 1H), 1.79 (dd,  $J = 11.5, 4.2$  Hz, 1H), 1.75 (d,  $J = 4.0$  Hz, 1H), 1.72 (s, 3H), 1.70-1.60 (m, 1H), 1.47 (td,  $J = 14.0, 4.0$  Hz, 1H), 1.06 (s, 3H), 0.99 (s, 3H) ppm.

$^{13}\text{C-NMR}$  (150 MHz,  $\text{CDCl}_3$ ):  $\delta = 205.4, 143.4, 133.2, 75.4, 69.6, 44.4, 42.9, 42.5, 31.4, 26.6, 24.1, 17.9, 16.4, 11.9$  ppm.

**IR** (neat):  $\nu = 3410, 2933, 1657, 1356, 1039, 998, 733, 544$   $\text{cm}^{-1}$ .

**HRMS** (ESI,  $m/z$ ):  $[\text{M}+\text{H}]^+$  calcd. for  $\text{C}_{14}\text{H}_{23}\text{O}_3$ , 239.1640; found 239.1640.

$R_f = 0.23$  (Hexane:EtOAc = 1:3), UV-active, blue spot (CAM).

**(4a*S*,6a*S*,10a*S*,10b*R*)-3,3,6a,8,10b-pentamethyl-1,4a,5,6,6a,10,10a,10b-octahydro-7*H*-naphtho[2,1-*d*][1,3]dioxin-7-one (23):**

$[\alpha]_{\text{D}}^{22}$   $-39.3$  ( $c = 1.00$ , MeOH)

$^1\text{H-NMR}$  (600 MHz,  $\text{CDCl}_3$ ):  $\delta = 6.60$  (d,  $J = 5.5$  Hz, 1H), 3.52-3.47 (m, 3H), 2.34 (ddt,  $J = 18.8, 11.7, 2.3$  Hz, 1H), 2.02-1.90 (m, 2H), 1.73 (s, 3H), 1.67-1.55 (m, 4H), 1.41 (s, 6H), 1.19 (s, 3H), 1.07 (s, 3H) ppm.

$^{13}\text{C-NMR}$  (150 MHz,  $\text{CDCl}_3$ ):  $\delta = 204.7, 142.3, 133.6, 99.3, 76.7, 71.9, 45.0, 44.5, 37.2, 31.9, 29.9, 23.6, 23.5, 19.2, 18.5, 16.5, 12.9$  ppm.

**IR** (neat):  $\nu = 2989, 2943, 2864, 1672, 1444, 1392, 1205, 1042, 846$   $\text{cm}^{-1}$ .

**HRMS** (ESI,  $m/z$ ):  $[\text{M}+\text{H}]^+$  calcd. for  $\text{C}_{17}\text{H}_{27}\text{O}_3$ , 279.1960; found 279.1954.

$R_f = 0.51$  (Hexane:EtOAc = 2:1), UV-active, blue spot (CAM).

**M.p.** =  $79$  °C

**(4a*S*,6a*S*,7*S*,10a*S*,10b*R*)-3,3,6a,7,8,10b-hexamethyl-4a,5,6,6a,7,10,10a,10b-octahydro-*H*-naphtho[2,1-d][1,3]dioxin-7-ol (20):**

$[\alpha]_D^{22} -27.9$  ( $c = 1.00$ , MeOH)

**$^1\text{H-NMR}$**  (500 MHz,  $\text{CDCl}_3$ ):  $\delta = 5.29$  (s, 1H), 3.52-3.47 (m, 1H), 3.46 (s, 2H), 2.02-1.90 (m, 1H), 1.70 (s, 3H), 1.69-1.60 (m, 4H), 1.56-1.49 (m, 2H), 1.45 (s, 3H), 1.42 (s, 3H), 1.29 (s, 3H), 1.22 (s, 1H), 1.17 (s, 3H), 1.07 (s, 3H) ppm.

**$^{13}\text{C-NMR}$**  (125 MHz,  $\text{CDCl}_3$ ):  $\delta = 138.7$ , 121.1, 99.2, 77.9, 77.5, 72.7, 40.8, 40.4, 37.1, 30.5, 30.0, 23.8, 23.7, 23.1, 19.4, 18.0, 15.7, 12.4 ppm.

**IR** (neat):  $\nu = 3499$ , 2987, 2943, 2897, 1452, 1378, 1284, 1206, 1102, 860  $\text{cm}^{-1}$ .

**HRMS** (EI,  $m/z$ ):  $[\text{M}]^+$  calcd. for  $\text{C}_{18}\text{H}_{30}\text{O}_3$ , 294.2195; found 294.2192.

$R_f = 0.48$  (Hexane:EtOAc = 2:1), non UV-active, blue spot (CAM).

**M.p.** = 182 °C

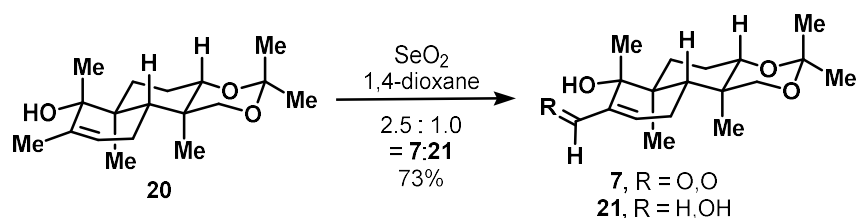

**(4a*S*,6a*S*,7*R*,10a*S*,10b*R*)-7-Hydroxy-3,3,6a,7,10b-pentamethyl-4a,5,6,6a,7,10,10a,10b-octahydro-1*H*-naphtho[2,1-d][1,3]dioxine-8-carbaldehyde (15); (4a*S*,6a*S*,7*R*,10a*S*, 10b*R*)-8-(hydroxymethyl)-3,3,6a,7,10b-pentamethyl-4a,5,6,6a,7,10,10a,10b-octahydro-1*H*-naphtho[2,1-d][1,3]dioxin-7-ol (7):** A mixture of alcohol **20** (1.69 g, 5.76 mmol, 1.00 equiv) and selenium dioxide (1.60 g, 14.4 mmol, 2.50 equiv) was dissolved in 1,4-dioxane (58.0 mL, 0.100 M) and then placed in an oil bath at 90 °C. After stirring for 2h, the resulting brown mixture was cooled to room temperature and quenched by the addition of distilled water. The aq. phase was extracted three times with EtOAc and the combined organic layers were washed with sat. aq. NaCl solution. The solution was dried over  $\text{MgSO}_4$  and concentrated *in vacuo*. The crude products were purified by gradient flash chromatography (Yamazen, eluting with 13-34% EtOAc in hexanes) to afford 0.910 g of aldehyde **7** as a yellow solid and 0.370 g (73% combined yield, **7:21** = 2.5:1.0) of alcohol **21** as a yellow foam.

**(4a*S*,6a*S*,7*R*,10a*S*,10b*R*)-7-Hydroxy-3,3,6a,7,10b-pentamethyl-4a,5,6,6a,7,10,10a,10b-octahydro-1*H*-naphtho[2,1-*d*][1,3]dioxine-8-carbaldehyde (24):**

$[\alpha]_{\text{D}}^{22} -60.1$  ( $c = 1.00$ , MeOH)

$^1\text{H-NMR}$  (500 MHz,  $\text{CDCl}_3$ ):  $\delta = 9.35$  (s, 1H), 6.67 (br s, 1H), 4.20 (s, 1H), 3.55-3.47 (m, 3H), 2.42-2.32 (m, 1H), 2.15-2.07 (m, 1H), 1.77-1.64 (m, 3H), 1.57-1.50 (m, 2H), 1.46 (s, 3H), 1.43 (s, 6H), 1.21 (s, 3H), 1.05 (s, 3H) ppm.

$^{13}\text{C-NMR}$  (125 MHz,  $\text{CDCl}_3$ ):  $\delta = 196.3$ , 151.6, 145.0, 99.3, 77.3, 75.9, 72.5, 40.2, 39.7, 37.0, 30.0, 29.4, 25.4, 25.1, 23.6, 19.3, 15.7, 12.4 ppm.

**IR** (neat):  $\nu = 3498$ , 2987, 2942, 1688, 1638, 1378, 1221, 1208, 862  $\text{cm}^{-1}$ .

**HRMS** (ESI,  $m/z$ ):  $[\text{M}-\text{H}]^-$  calcd. for  $\text{C}_{18}\text{H}_{27}\text{O}_4$ , 307.1915; found 307.1915.

$R_f = 0.57$  (Hexane:EtOAc = 1:1), UV-active, blue spot (CAM).

**M.p.** = 195 °C

**(4a*S*,6a*S*,7*R*,10a*S*,10b*R*)-8-(Hydroxymethyl)-3,3,6a,7,10b-pentamethyl-4a,5,6,6a,7,10,-10a,10b-octahydro-1*H*-naphtho[2,1-*d*][1,3]dioxin-7-ol (21):**

$[\alpha]_{\text{D}}^{22} -8.0$  ( $c = 0.80$ , MeOH)

$^1\text{H-NMR}$  (500 MHz,  $\text{CDCl}_3$ ):  $\delta = 5.57$  (br s, 1H), 4.37 (d,  $J = 11.6$  Hz, 1H), 3.92 (d,  $J = 11.6$  Hz, 1H), 3.54-3.41 (m, 3H), 2.23 (br s, 2H), 2.09-1.99 (m, 1H), 1.76 (dt,  $J = 18.4$ , 4.5 Hz, 1H), 1.70-1.58 (m, 3H), 1.58-1.50 (m, 2H), 1.45 (s, 3H), 1.42 (s, 3H), 1.37 (s, 3H), 1.17 (s, 3H), 1.04 (s, 3H) ppm.

$^{13}\text{C-NMR}$  (125 MHz,  $\text{CDCl}_3$ ):  $\delta = 141.1$ , 125.6, 99.2, 78.9, 72.6, 65.2, 40.6, 40.3, 37.1, 30.0, 29.8, 24.9, 23.8, 22.9, 19.3, 15.8, 12.3 ppm.

**IR** (neat):  $\nu = 3407$ , 2988, 2943, 2898, 2876, 1378, 1258, 1205, 1100, 1075, 859, 737  $\text{cm}^{-1}$ .

**HRMS** (ESI,  $m/z$ ):  $[\text{M}-\text{H}]^-$  calcd. for  $\text{C}_{18}\text{H}_{29}\text{O}_4$ , 309.2070; found 309.2071.

$R_f = 0.19$  (Hexane:EtOAc = 1:1), UV-active, blue spot (CAM).

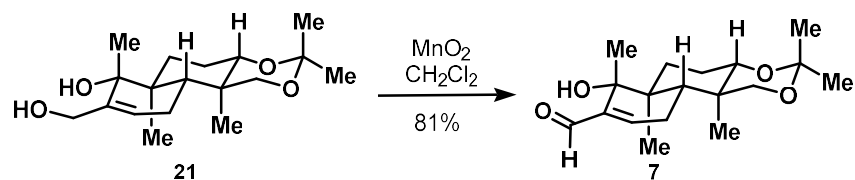

A mixture of alcohol **21** (600 mg, 1.95 mmol, 1.00 equiv) and manganese dioxide (2.03 g, 23.3 mmol, 12.0 equiv) in DCM (32.0 mL, 60.0 mM) was stirred for 16 h at room temperature. After filtering through celite (EtOAc eluent), the solution was concentrated *in vacuo* and the crude material was purified by gradient flash chromatography (Yamazen, eluting with 24-45% EtOAc in hexanes) to afford 489 mg (81%) of aldehyde **7** as a yellow solid.

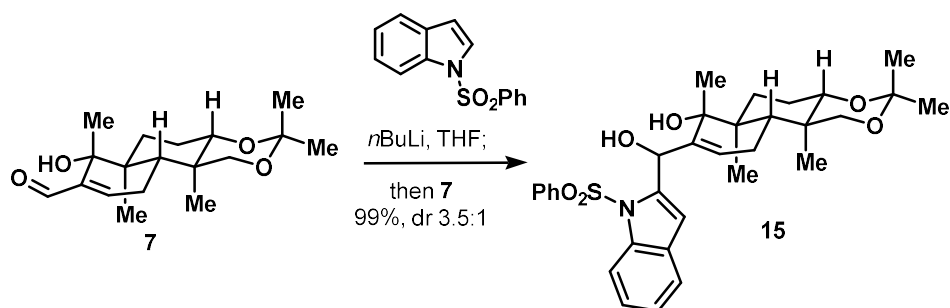

**(4a*S*,6a*S*,7*R*,10a*S*,10b*R*)-8-(Hydroxy(1-(phenylsulfonyl)-1*H*-indol-2-yl)methyl)-3,3,6a,7,10b-pentamethyl-4a,5,6,6a,7,10,10a,10b-octahydro-1*H*-naphtho[2,1-*d*][1,3]dioxin-7-ol (**15**):** Trace water was removed from 1-(phenylsulfonyl)-1*H*-indole (3.65 g, 14.2 mmol, 3.50 equiv) via azeotropic distillation with benzene. Then, it was dissolved in THF (700 mL) and cooled to  $-78^\circ\text{C}$ . A solution of  $n\text{BuLi}$  (8.75 mL of a 1.60 M solution in pentane, 14.0 mmol, 3.45 equiv) was added dropwise. The yellow solution was stirred at  $0^\circ\text{C}$  for 1 h. During this time, trace water was removed from aldehyde **7** (1.25 g, 4.04 mmol, 1.00 equiv) via azeotropic distillation with benzene. Then it was dissolved in THF (20.0 mL) and added via cannula transfer into the solution containing the 2-lithio-indole over the course of 5 minutes at  $-78^\circ\text{C}$ .



After stirring the resulting solution at  $-78^{\circ}\text{C}$  for 1 h, the solution was warmed to  $0^{\circ}\text{C}$  and stirred additional 1 h before being quenched with sat. aq.  $\text{NH}_4\text{Cl}$ . The aq. layer was extracted three times with EtOAc and the combined organic layers were washed with sat. aq. NaCl, dried over  $\text{MgSO}_4$ , filtered, and concentrated. The residue was purified via gradient flash chromatography (Yamazen, eluting with 46-67% EtOAc in hexanes) to yield a mixture of diastereomers of alcohol **15** as a yellow foam (2.27 g, 99% combined yield, dr = 3.5:1) which was used in the next reaction. Analytical samples were prepared via gradient flash chromatography (Yamazen, eluting with 39-59% EtOAc in hexanes).

**Major isomer:**

$[\alpha]_{\text{D}}^{22} -42.0$  (c = 1.00, MeOH)

$^1\text{H-NMR}$  (500 MHz,  $\text{CDCl}_3$ ):  $\delta$  = 8.11 (d,  $J$  = 8.5 Hz, 1H), 7.74 (d,  $J$  = 7.9 Hz, 2H), 7.51-7.47 (m, 2H), 7.40-7.34 (m, 2H), 7.30-7.27 (m, 1H), 7.25-7.20 (m, 1H), 6.91 (s, 1H), 6.16 (s, 1H), 5.05 (br s, 1H), 4.09 (br s, 1H), 3.55-3.49 (m, 1H), 3.48-3.43 (m, 1H), 3.42-3.37 (m, 1H), 2.43 (br s, 1H), 1.94-1.84 (m, 1H), 1.75-1.66 (m, 2H), 1.65-1.62 (m, 2H), 1.61 (s, 3H), 1.59-1.53 (m, 2H), 1.46 (s, 3H), 1.42 (s, 3H), 1.13 (s, 3H), 1.07 (s, 3H) ppm.

$^{13}\text{C-NMR}$  (125 MHz,  $\text{CDCl}_3$ ):  $\delta$  = 142.3, 141.9, 138.6, 137.5, 133.8, 129.6, 129.3 (2x), 126.4 (2x), 125.3, 124.7, 124.0, 121.1, 115.0, 112.7, 99.2, 79.8, 77.9, 72.5, 68.1, 40.7, 40.3, 37.0, 30.0, 29.9, 24.7, 23.8, 22.9, 19.4, 15.9, 12.2 ppm.

**IR** (neat):  $\nu$  = 3418, 2989, 2944, 1447, 1372, 1173, 1091, 726  $\text{cm}^{-1}$ .

**HRMS** (ESI,  $m/z$ ):  $[\text{M}-\text{H}]^-$  calcd. for  $\text{C}_{32}\text{H}_{38}\text{NO}_6\text{S}$ , 564.2425; found 564.2414.

$R_f$  = 0.36 (Hexane:EtOAc = 1:1), UV-active, blue spot (CAM).

**Minor isomer:**

$[\alpha]_{\text{D}}^{22} +58.0$  (c = 1.00, MeOH)

$^1\text{H-NMR}$  (500 MHz,  $\text{CDCl}_3$ ):  $\delta$  = 8.07 (d,  $J$  = 8.2 Hz, 1H), 7.83 (d,  $J$  = 8.2 Hz, 2H), 7.55-7.49 (m, 1H), 7.46 (d,  $J$  = 7.6 Hz, 1H), 7.43-7.39 (m, 2H), 7.34-7.27 (m, 1H), 7.25-7.20 (m, 1H), 6.76 (s, 1H), 6.05 (d,  $J$  = 3.7 Hz, 1H), 5.85 (br s, 1H), 3.54-3.34 (m, 3H), 3.11 (d,  $J$  = 4.9 Hz, 1H), 2.19-2.09 (m, 1H), 1.85 (dt,  $J$  = 18.5, 4.8 Hz, 1H), 1.76 (s, 1H), 1.70-1.76 (m, 1H), 1.66-1.60 (m, 1H), 1.55-1.49 (m, 1H), 1.47 (s, 3H), 1.46 (s, 3H), 1.43 (s, 3H), 1.20 (s, 3H), 1.07 (s, 3H) ppm.

$^{13}\text{C-NMR}$  (125 MHz,  $\text{CDCl}_3$ ):  $\delta$  = 144.1, 143.0, 138.3, 137.5, 134.1, 129.4 (2x), 129.0, 126.7 (2x), 125.8, 125.1, 124.1, 121.3, 114.9, 111.4, 99.2, 77.9, 72.6, 66.0, 40.7, 40.6, 37.1, 30.2, 30.0, 24.7, 23.8, 23.1, 19.4, 16.0, 12.5 ppm.

**IR** (neat):  $\nu = 3422, 2989, 2943, 1448, 1172, 1091, 738, 726, 590 \text{ cm}^{-1}$ .

**HRMS** (ESI,  $m/z$ ):  $[M-H]^-$  calcd. for  $C_{32}H_{38}NO_6S$ , 564.2425; found 564.2414.

**R<sub>f</sub>** = 0.33 (Hexane:EtOAc = 1:1), UV-active, blue spot (CAM).

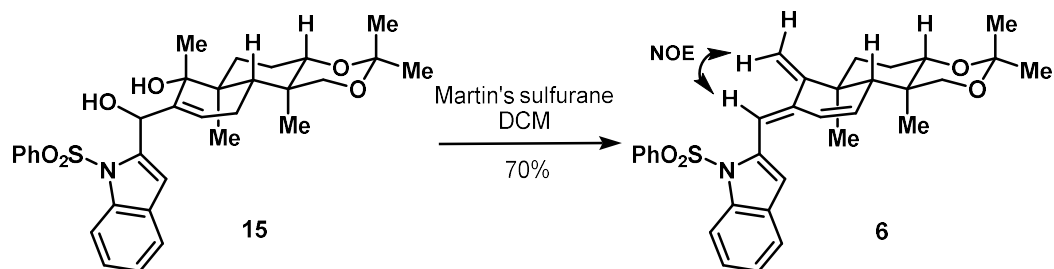

**1-(Phenylsulfonyl)-2-((*E*)-((4*aS*,6*aS*,10*aR*,10*bR*)-3,3,6*a*,10*b*-tetramethyl-7-methylene-5,6,6*a*,7,10*a*,10*b*-hexahydro-1*H*-naphtho[2,1-*d*][1,3]dioxin-8(4*aH*)-ylidene)methyl)-1*H*-indole (**6**):** Martin's sulfurane (5.00 g, 7.44 mmol, 2.40 equiv) was added as a solid to a solution of alcohol **15** (1.76 g, 3.10 mmol, 1.00 equiv) in DCM (74.4 mL, 40.0 mM) at room temperature. After being stirred for 20 min, the reaction mixture was quenched by the addition of sat. aq.  $\text{NaHCO}_3$ . The aq. layer was extracted three times with DCM, washed with sat. aq.  $\text{NaCl}$  solution and dried over  $\text{MgSO}_4$ . After removal of the solvent *in vacuo*, the residue was purified by gradient flash chromatography (Yamazen, eluting with 5-26% EtOAc in hexanes) to afford 1.15 g (70%) of compound **6** as a yellow solid. The double bond geometry was confirmed by a 2D-NOESY experiment.

$[\alpha]_D^{22} -151.2$  ( $c = 1.00$ , MeOH)

**$^1\text{H-NMR}$**  (500 MHz,  $\text{CDCl}_3$ ):  $\delta = 8.24$  (d,  $J = 8.5$  Hz, 1H), 7.68 (d,  $J = 8.4$  Hz, 2H), 7.50-7.44 (m, 1H), 7.42 (d,  $J = 7.6$  Hz, 1H), 7.36-7.24 (m, 2H), 7.24-7.20 (m, 1H), 7.08 (s, 1H), 6.54 (s, 1H), 6.51 (d,  $J = 10.1$  Hz, 1H), 5.59 (d,  $J = 10.1$  Hz, 1H), 5.29 (s, 1H), 4.84 (s, 1H), 3.61 (d,  $J = 10.4$  Hz, 2H), 3.49 (d,  $J = 10.7$  Hz, 1H), 2.11 (s, 1H), 1.92-1.80 (m, 3H), 1.73-1.65 (m, 1H), 1.47 (s, 3H), 1.45 (s, 3H), 1.15 (s, 3H), 1.12 (s, 3H) ppm.

**$^{13}\text{C-NMR}$**  (125 MHz,  $\text{CDCl}_3$ ):  $\delta = 156.9, 138.6, 138.4, 137.2, 137.0, 133.8, 130.11, 130.0, 129.1$  (2x), 126.7 (2x), 125.9, 125.1, 124.2, 120.8, 115.4, 115.3, 113.6, 105.3, 99.5, 71.8, 49.0, 40.5, 36.9, 34.5, 29.9, 24.2, 21.0, 19.4, 12.8 ppm.

**IR** (neat):  $\nu = 2990, 2940, 2864, 1370, 1174, 1146, 1091, 725 \text{ cm}^{-1}$ .

**HRMS** (ESI,  $m/z$ ):  $[M+H]^+$  calcd. for  $C_{32}H_{36}O_4NS$ , 530.2360; found 530.2359.

**R<sub>f</sub>** = 0.48 (Hexane:EtOAc = 3:1), UV-active, green spot (*p*-anisaldehyde).

**M.p.** = 131 °C

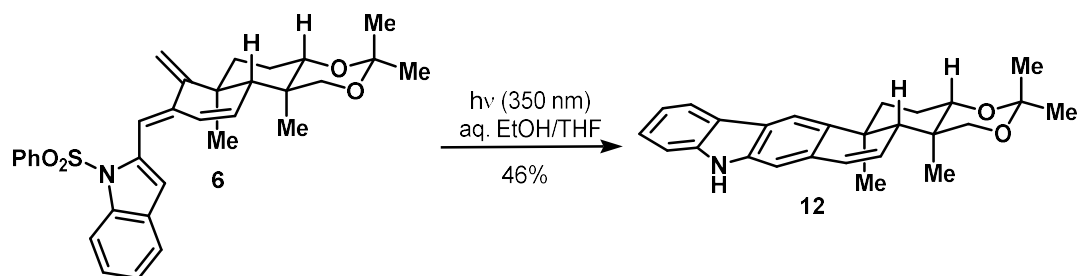

**(4a*R*,4b*R*,13b*S*,15a*S*)-2,2,4a,13b-Tetramethyl-4,4a,4b,8,13b,14,15,15a-octahydro-[1,3]-dioxino[5',4':5,6]naphtho[2,1-b]carbazole (12):** A pyrex glass tube (11 cm tall, 1 cm diameter), equipped with a screw cap, was charged with a solution of acetone **6** (57.0 mg, 0.108 mmol, 1.00 equiv) in 5% aq. ethanol (10.7 mL) and THF (1.20 mL). The vessel was degassed by bubbling a stream of nitrogen through the solution for 45 min. The pale yellow solution was then irradiated for 1 h with UV-A light (350 nm) in a Luzchem photobox at room temperature. After reducing the EtOH *in vacuo*, the residue was dissolved in EtOAc and water. The aq. layer was extracted three times with EtOAc and the combined organic layers were dried over  $MgSO_4$ , filtered and concentrated *in vacuo*. Gradient flash chromatography (Yamazen, eluting with 5-26% EtOAc in hexanes) provided 19.0 mg (46%) of carbazole **12** as a yellow oil.

The stability of the product against irradiation with UV-A (350 nm) light was confirmed by irradiating 5 mg of **33** in 5% aq. EtOH (1.60 mL, 8.00 mM) for 2 h at room temperature. After the work-up described above, the material was fully recovered indicating no change by TLC and NMR analysis.

$[\alpha]_D^{22} -105.2$  ( $c = 1.00$ , MeOH)

**<sup>1</sup>H-NMR** (700 MHz,  $C_6D_6$ ):  $\delta = 8.09$  (d,  $J = 8.2$  Hz, 1H), 7.82 (s, 1H), 7.38 (t,  $J = 7.5$  Hz, 1H), 7.25 (t,  $J = 7.5$  Hz, 1H), 7.09 (d,  $J = 8.0$  Hz, 1H), 6.85 (s, 1H), 6.69 (dd,  $J = 9.3, 2.7$  Hz, 1H), 6.63 (br s, 1H), 5.70-5.65 (m, 1H), 3.68 (d,  $J = 10.6$  Hz, 1H), 3.46 (dd,  $J = 11.7, 2.9$  Hz, 1H),

3.28 (d,  $J = 10.6$  Hz, 1H), 2.08 (d,  $J = 12.8$  Hz, 1H), 1.93-1.84 (m, 1H), 1.75-1.67 (m, 2H), 1.61 (s, 3H), 1.44 (s, 3H), 1.36 (s, 3H), 1.18 (s, 3H) ppm.

$^{13}\text{C-NMR}$  (176 MHz,  $\text{C}_6\text{D}_6$ ):  $\delta = 140.7, 140.5, 138.4, 131.8, 130.0, 127.4, 125.8, 124.3, 123.2, 120.3, 119.8, 113.8, 111.0, 109.0, 99.3, 77.2, 71.9, 47.4, 38.3, 36.4, 35.1, 30.4, 24.8, 22.8, 19.5, 13.8$  ppm.

**IR** (neat):  $\nu = 3412, 2937, 2859, 1736, 1449, 1333, 1257, 1194, 811$   $\text{cm}^{-1}$ .

**HRMS** (ESI,  $m/z$ ):  $[\text{M-H}]^-$  calcd. for  $\text{C}_{26}\text{H}_{28}\text{O}_2\text{N}$ , 386.2117; found 386.2120.

$R_f = 0.46$  (Hexane:EtOAc = 3:1), UV-active, pink spot (*p*-anisaldehyde).

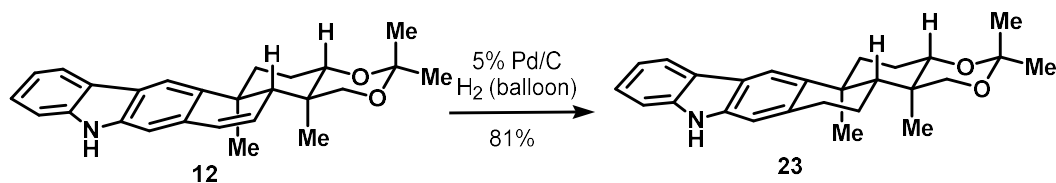

**(4a*R*,4b*R*,13b*S*,15a*S*)-2,2,4a,13b-Tetramethyl-4,4a,4b,5,6,8,13b,14,15,15a-decahydro-**

**[1,3]dioxino[5',4':5,6]naphtho[2,1-b]carbazole (23):** Hydrogen from a balloon was bubbled through a mixture of carbazole **12** (19.0 mg, 0.0490 mmol, 1.00 equiv) and 5% Pd/C (11.5 mg, 0.110 mmol, 2.20 equiv) in MeOH (1.60 mL, 30.0 mM) for 1 min. The mixture was then vigorously stirred under an atmosphere of hydrogen (balloon) for 4 h at room temperature. After filtering the mixture through celite (EtOAc/MeOH eluent), the solution was concentrated *in vacuo* and the crude material was purified by gradient flash chromatography (Yamazen, eluting with 5-26% EtOAc in hexanes) to afford 15.0 mg (81%) of carbazole **23** as a colorless oil.

$[\alpha]_D^{22} +47.7$  ( $c = 0.60$ , MeOH)

$^1\text{H-NMR}$  (500 MHz,  $\text{CDCl}_3$ ):  $\delta = 8.01$  (d,  $J = 7.6$  Hz, 1H), 7.93 (s, 1H), 7.84 (br s, 1H), 7.36 (d,  $J = 3.7$  Hz, 2H), 7.19 (dt,  $J = 7.7, 3.9$  Hz, 1H), 7.08 (s, 1H), 3.70-3.61 (m, 2H), 3.53 (d,  $J = 10.7$  Hz, 1H), 3.19-3.11 (m, 1H), 3.09-2.99 (m, 1H), 2.63 (d,  $J = 12.5$  Hz, 1H), 1.97-1.79 (m, 4H), 1.76-1.70 (m, 1H), 1.67-1.60 (m, 1H), 1.47 (s, 3H), 1.45 (s, 3H), 1.33 (s, 3H), 1.22 (s, 3H) ppm.

$^{13}\text{C-NMR}$  (125 MHz,  $\text{CDCl}_3$ ):  $\delta = 141.9, 140.1, 138.2, 133.5, 125.5, 123.7, 122.0, 120.0, 119.3, 115.4, 110.6, 110.0, 99.2, 77.5, 72.7, 46.1, 38.2, 37.9, 37.2, 30.4, 30.0, 26.6, 24.7, 19.4, 18.3, 12.4$  ppm.

**IR** (neat):  $\nu = 2989, 2940, 1465, 1379, 1242, 1108, 853, 728$   $\text{cm}^{-1}$ .

**HRMS** (ESI,  $m/z$ ):  $[\text{M}-\text{H}]^-$  calcd. for  $\text{C}_{26}\text{H}_{30}\text{NO}_2$ , 388.2282; found 388.2276.

$R_f = 0.44$  (Hexane:EtOAc = 3:1), UV-active, purple spot (*p*-anisaldehyde).

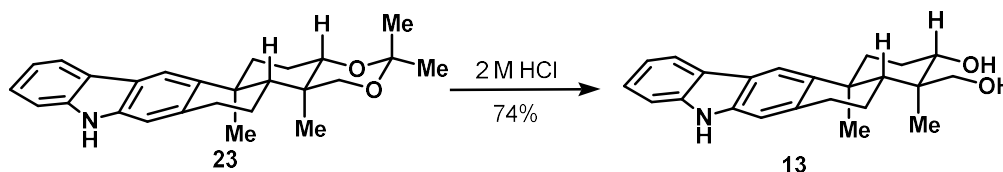

**(3S,4R,4aR,13bS)-4-(hydroxymethyl)-4,13b-dimethyl-2,3,4,4a,5,6,8,13b-octahydro-1H-naphtho[2,1-b]carbazol-3-ol (**34**):**

To a solution of carbazole **23** (15.0 mg, 0.0380 mmol, 1.00 equiv) in THF (400  $\mu\text{L}$ ) was added 2.00 M aq. HCl (400  $\mu\text{L}$ ) and the mixture was vigorously stirred for 1 h at room temperature. The solution was quenched by the addition of sat. aq.  $\text{NaHCO}_3$  at 0  $^\circ\text{C}$ . The mixture was warmed to room temperature and additional sat. aq.  $\text{NaHCO}_3$  was added until the gas evolution ceased. Solid NaCl was added and the aq. layer was extracted five times with EtOAc and dried over  $\text{MgSO}_4$ . After removal of the solvent *in vacuo*, gradient flash chromatography (Yamazen, eluting with 50-70% EtOAc in hexanes) afforded 10.0 mg (74%) of diol **13** as a pale yellow oil.

$[\alpha]_D^{22} +58.4$  ( $c = 0.50$ , MeOH)

$^1\text{H-NMR}$  (500 MHz,  $\text{CDCl}_3$ ):  $\delta = 8.00$  (d,  $J = 7.5$  Hz, 1H), 7.94 (s, 1H), 7.84 (br s, 1H), 7.36 (d,  $J = 3.5$  Hz, 2H), 7.19 (dt,  $J = 7.6, 3.9$  Hz, 1H), 7.07 (s, 1H), 3.84 (d,  $J = 10.6$  Hz, 1H), 3.80-3.75 (m, 1H), 3.52 (d,  $J = 10.6$  Hz, 1H), 3.17-3.10 (m, 1H), 3.08-3.02 (m, 1H), 2.58-2.53 (m, 1H), 1.93-1.86 (m, 3H), 1.81-1.76 (m, 1H), 1.75-1.69 (m, 1H), 1.55 (d,  $J = 10.2$  Hz, 1H), 1.33 (s, 3H), 1.07 (s, 3H) ppm.

$^{13}\text{C-NMR}$  (150 MHz,  $\text{CDCl}_3$ ):  $\delta = 141.4, 140.0, 138.1, 133.5, 125.4, 123.6, 121.9, 119.9, 119.2, 115.6, 110.4, 109.7, 76.9, 72.3, 44.9, 42.2, 37.7, 37.4, 31.0, 27.8, 25.8, 19.3, 11.2$  ppm.

**IR** (neat):  $\nu = 3413, 2938, 2872, 1466, 1441, 1264, 1066, 1015, 732$   $\text{cm}^{-1}$ .

HRMS (ESI,  $m/z$ ):  $[M-H]^-$  calcd. for  $C_{23}H_{26}NO_2$ , 348.1969; found 348.1963.

$R_f$  = 0.25 (Hexane:EtOAc = 1:2), UV-active, blue spot (CAM).

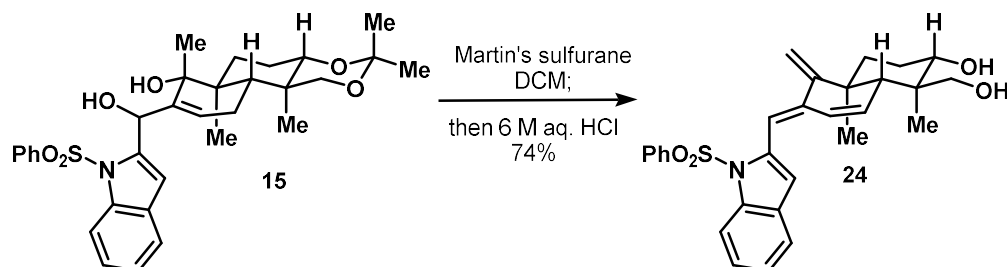

**(1R,2S,4aS,8aR,E)-1-(Hydroxymethyl)-1,4a-dimethyl-5-methylene-6-((1-(phenylsulfonyl)-1H-indol-2-yl)methylene)-1,2,3,4,4a,5,6,8a-octahydronaphthalen-2-ol (24):** Martin's sulfurane (5.00 g, 7.44 mmol, 2.40 equiv) was added as a solid to a solution of alcohol **15** (1.76 g, 3.10 mmol, 1.00 equiv) in DCM (37.2 mL, 80.0 mM) at room temperature. After being stirred for 25 min, an aq. solution of 6 M HCl (37.2 mL) was added at 0 °C. The resulting brown solution was stirred at room temperature for 1.5 h before being quenched by the addition of sat. aq.  $NaHCO_3$  at 0 °C. The mixture was warmed to room temperature and additional sat. aq.  $NaHCO_3$  was added under stirring until the gas evolution ceased. The mixture was transferred into a sep. funnel and solid NaCl was added. The aq. layer was then extracted four times with EtOAc and dried over  $MgSO_4$ . After removal of the solvent *in vacuo*, the crude material was purified by gradient flash chromatography (Yamazen, eluting with 50-70% EtOAc in hexanes) affording 1.1 g (74%) of diol **24** as a yellow solid in 95% purity.

**(1R,2S,4aS,8aR,E)-1-(Hydroxymethyl)-1,4a-dimethyl-5-methylene-6-((1-(phenylsulfonyl)-1H-indol-2-yl)methylene)-1,2,3,4,4a,5,6,8a-octahydronaphthalen-2-ol (24):**

$[\alpha]_D^{22}$  -178.3 ( $c$  = 1.00, MeOH)

$^1H$ -NMR (500 MHz,  $CDCl_3$ ):  $\delta$  = 8.24 (d,  $J$  = 8.6 Hz, 1H), 7.68 (d,  $J$  = 8.1 Hz, 2H), 7.51-7.41 (m, 2H), 7.41-7.33 (m, 3H), 7.08 (s, 1H), 6.55 (s, 1H), 6.52 (d,  $J$  = 10.4 Hz, 1H), 5.72 (d,  $J$  = 10.1 Hz, 1H), 5.30 (s, 1H), 4.85 (s, 1H), 3.75 (d,  $J$  = 10.4 Hz, 2H), 3.47 (d,  $J$  = 10.6 Hz, 1H), 2.47 (br s, 2H), 2.18 (s, 1H), 1.93-1.74 (m, 4H), 1.11 (s, 3H), 1.00 (s, 3H) ppm.

$^{13}\text{C-NMR}$  (125 MHz,  $\text{CDCl}_3$ ):  $\delta = 156.7, 138.6, 138.5, 137.2, 137.1, 133.7, 131.1, 130.1, 129.1, 126.7, 125.9, 125.1, 124.2, 120.7, 115.3, 115.1, 113.6, 105.8, 76.7, 71.1, 47.6, 42.0, 40.2, 33.9, 27.5, 20.1, 11.6$  ppm.

**IR** (neat):  $\nu = 3382, 2935, 1447, 1370, 1174, 1090, 725$   $\text{cm}^{-1}$ .

**R<sub>f</sub>** = 0.22 (Hexane:EtOAc = 1:2), UV-active, blue spot (CAM).

**M.p.** = 181 °C

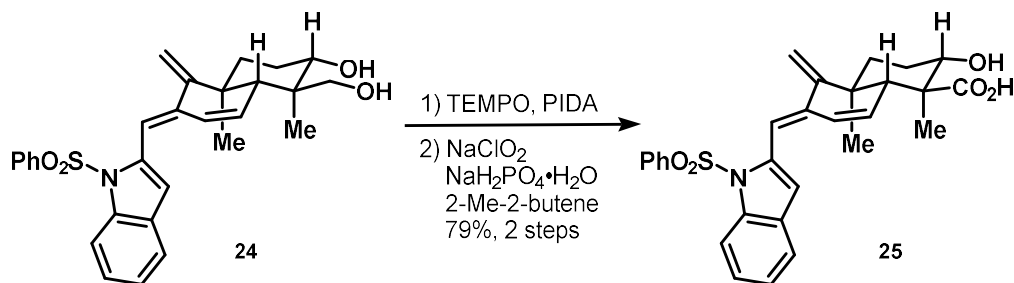

**(1*S*,2*S*,4*aS*,8*aR*,*E*)-2-Hydroxy-1,4*a*-dimethyl-5-methylene-6-((1-(phenylsulfonyl)-1*H*-indol-2-yl)methylene)-1,2,3,4,4*a*,5,6,8*a*-octahydronaphthalene-1-carbaldehyde (**26**):** To a solution of diol **24** (706 mg, 1.45 mmol, 1.00 equiv) in DCM (11.9 mL) and  $\text{H}_2\text{O}$  (11.9 mL) was added TEMPO (294 mg, 1.88 mmol, 1.30 equiv), followed by PIDA (604 mg, 0.570 mmol, 1.30 equiv) as solids in one portion. The resulting orange-brown mixture was vigorously stirred for 4 h at room temperature before being quenched by the addition of sat. aq.  $\text{NaHCO}_3$  and sat. aq.  $\text{Na}_2\text{S}_2\text{O}_3$  (ca. 4:1). The mixture was transferred into a sep. funnel and solid  $\text{NaCl}$  was added. The aq. layer was then extracted four times with EtOAc, washed with sat. aq.  $\text{NaCl}$ , dried over  $\text{MgSO}_4$ , and filtered. After removal of the solvent *in vacuo*, this material was used in the next reaction without further purification. Alternatively the sample was purified by gradient flash chromatography (Yamazen, eluting with 30-50% EtOAc in hexanes) affording 564 mg (80%) of aldehyde **25** as an orange foam

**(1*S*,2*S*,4*aS*,8*aR*,*E*)-2-Hydroxy-1,4*a*-dimethyl-5-methylene-6-((1-(phenylsulfonyl)-1*H*-indol-2-yl)methylene)-1,2,3,4,4*a*,5,6,8*a*-octahydronaphthalene-1-carboxylic acid (**25**):** To a solution of the crude aldehyde in acetone (13.9 mL),  $\text{H}_2\text{O}$  (6.90 mL), and 2-Me-2-butene (1.32 mL, 17.3 mmol, 12.0 equiv) was added a mixture of  $\text{NaClO}_2$  (861mg, 9.50 mmol, 6.00 equiv, ~90% techn.) and  $\text{NaH}_2\text{PO}_4 \cdot \text{H}_2\text{O}$  (1.99 g, 14.4 mmol, 10.0 equiv) at 0 °C. The mixture was

warmed to room temperature and stirred for 2 h before being quenched by the addition of sat. aq. NaCl and sat. aq. NH<sub>4</sub>Cl (ca. 1:1). The mixture was transferred into a sep. funnel and solid NaCl was added. The aq. layer was then extracted six times with EtOAc and dried over MgSO<sub>4</sub>. After concentrating the solution *in vacuo*, the crude material was purified by gradient flash chromatography (Yamazen, eluting with 0-10% MeOH in DCM) to afford 569 mg (78%) of acid **25** as a yellow oil.

**(1*S*,2*S*,4*aS*,8*aR*,*E*)-2-Hydroxy-1,4*a*-dimethyl-5-methylene-6-((1-(phenylsulfonyl)-1*H*-indol-2-yl)methylene)-1,2,3,4,4*a*,5,6,8*a*-octahydronaphthalene-1-carbaldehyde (**26**):**

[ $\alpha$ ]<sub>D</sub><sup>22</sup> –186.5 (c = 1.00, MeOH)

<sup>1</sup>H-NMR (400 MHz, CDCl<sub>3</sub>):  $\delta$  = 9.50 (s, 1H), 8.28 (d, *J* = 8.3 Hz, 1H), 7.70 (d, *J* = 7.8 Hz, 2H), 7.55-7.45 (m, 2H), 7.36 (q, *J* = 7.8 Hz, 3H), 7.29 (d, *J* = 9.3 Hz, 1H), 6.59 (s, 1H), 6.55 (dd, *J* = 10.0, 2.7 Hz, 1H), 5.46-5.36 (m, 2H), 4.93 (s, 1H), 3.96 (d, *J* = 9.6 Hz, 1H), 2.64 (s, 1H), 2.08-2.00 (m, 1H), 1.99-1.83 (m, 3H), 1.76 (br s, 1H), 1.22 (s, 3H), 1.16 (s, 3H) ppm.

<sup>13</sup>C-NMR (100 MHz, CDCl<sub>3</sub>):  $\delta$  = 205.9, 155.9, 138.4, 138.1, 137.3, 136.7, 133.8, 130.1, 129.1 (3x), 126.7 (2x), 126.4, 125.2, 124.2, 120.8, 116.1, 115.3, 113.8, 106.1, 72.0, 54.7, 45.7, 39.1, 33.8, 27.1, 20.0, 9.8 ppm.

IR (neat):  $\nu$  = 2932, 1722, 1447, 1368, 1173, 1119, 724 cm<sup>-1</sup>.

HRMS (ESI, *m/z*): [M–H]<sup>–</sup> calcd. for C<sub>29</sub>H<sub>28</sub>NSO<sub>4</sub>, 486.1745; found 486.1743.

R<sub>f</sub> = 0.21 (Hexane:EtOAc = 2:1), UV-active, blue spot (CAM).

**(1*S*,2*S*,4*aS*,8*aR*,*E*)-2-Hydroxy-1,4*a*-dimethyl-5-methylene-6-((1-(phenylsulfonyl)-1*H*-indol-2-yl)methylene)-1,2,3,4,4*a*,5,6,8*a*-octahydronaphthalene-1-carboxylic acid (**25**):**

[ $\alpha$ ]<sub>D</sub><sup>22</sup> –173.6 (c = 0.50, MeOH)

<sup>1</sup>H-NMR (700 MHz, CD<sub>3</sub>OD):  $\delta$  = 8.19 (d, *J* = 8.4 Hz, 1H), 7.64 (d, *J* = 8.0 Hz, 2H), 7.54 (t, *J* = 7.5 Hz, 1H), 7.47 (d, *J* = 7.5 Hz, 1H), 7.39-7.34 (m, 2H), 7.32 (t, *J* = 7.7 Hz, 1H), 7.23 (t, *J* = 7.7 Hz, 1H), 7.01 (s, 1H), 6.62 (s, 1H), 6.51 (d, *J* = 9.7 Hz, 1H), 5.63 (d, *J* = 9.7 Hz, 1H), 5.29 (s, 1H), 4.90 (s, 1H), 4.12-4.07 (m, 1H), 2.74 (s, 1H), 1.92-1.82 (m, 4H), 1.20 (s, 3H), 1.12 (s, 3H) ppm.

<sup>13</sup>C-NMR (176 MHz, CD<sub>3</sub>OD):  $\delta$  = 180.2, 158.7, 139.9, 139.4, 138.5, 138.1, 135.1, 133.3, 131.7, 130.2 (2x), 127.6 (2x), 126.4, 126.1, 125.3, 122.0, 116.2, 116.1, 114.8, 105.6, 75.7, 53.6, 50.9, 40.8, 35.2, 28.1, 20.7, 12.4 ppm.

IR (neat):  $\nu$  = 3357, 2927, 1697, 1447, 1359, 1173, 1088, 970, 748, 685 cm<sup>-1</sup>.

HRMS (ESI, *m/z*): [M–H]<sup>–</sup> calcd. for C<sub>29</sub>H<sub>28</sub>NO<sub>5</sub>S, 502.1694; found 502.1681.

R<sub>f</sub> = 0.38 (7% MeOH in DCM), UV-active, blue spot (CAM).



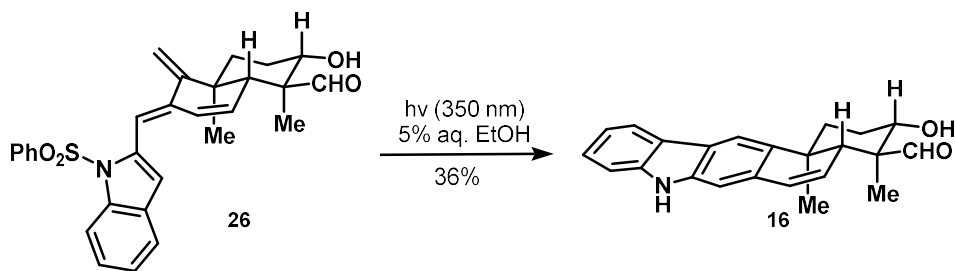

**(3*S*,4*S*,4*aR*,13*bS*)-3-Hydroxy-4,13*b*-dimethyl-2,3,4,4*a*,8,13*b*-hexahydro-1*H*-naphtho[2,1-*b*]carbazole-4-carbaldehyde (**16**):** A pyrex glass tube (11 cm tall, 1 cm diameter), equipped with a screw cap, was charged with a solution of aldehyde **26** (90.0 mg, 0.184 mmol, 1.00 equiv) in 5% aq. ethanol (9.00 mL, 20.0 mM). The vessel was degassed by bubbling a stream of nitrogen through the solution for 45 min. The mixture was then irradiated for 4 h with UV-A light (350 nm) in a Luzchem photobox at room temperature. After reducing the EtOH *in vacuo*, the residue was dissolved in EtOAc and sat. aq. NaCl. The aq. layer was extracted four times with EtOAc and the combined organic layers were dried over MgSO<sub>4</sub>, filtered and concentrated *in vacuo* the crude material was purified by gradient flash chromatography (Yamazen, eluting with 13-42% EtOAc in Hexanes) provided 23 mg (36%) of carbazole **16** as a white foam.

$[\alpha]_D^{22}$  -24.2 (c = 0.90, MeOH)

**<sup>1</sup>H-NMR** (700 MHz, CD<sub>3</sub>OD): δ = 9.48 (s, 1H), 8.03 (d, *J* = 7.5 Hz, 1H), 7.99 (br s, 1H), 7.85 (s, 1H), 7.43-7.36 (m, 2H), 7.22 (t, *J* = 6.4 Hz, 1H), 7.13 (s, 1H), 6.71 (dd, *J* = 9.5, 2.9 Hz, 1H), 5.66 (dd, *J* = 9.5, 2.0 Hz, 1H), 3.98 (dd, *J* = 10.8, 4.2 Hz, 1H), 2.76 (s, 1H), 2.49 (d, *J* = 12.4 Hz, 1H), 2.12-2.07 (m, 1H), 2.07-1.95 (m, 2H), 1.62 (br s, 1H), 1.34 (s, 3H), 1.19 (s, 3H) ppm.

**<sup>13</sup>C-NMR** (176 MHz, CD<sub>3</sub>OD): δ = 206.3, 140.2, 139.1, 138.1, 131.2, 130.7, 127.1, 125.9, 123.7, 123.0, 120.1, 119.7, 113.8, 110.8, 109.1, 71.8, 54.5, 44.5, 37.2, 34.5, 27.3, 22.0, 10.3 ppm.

**IR** (neat): ν = 3294, 2937, 2825, 1717, 1242, 1023, 716 cm<sup>-1</sup>.

**HRMS** (ESI, *m/z*): [M-H]<sup>-</sup> calcd. for C<sub>23</sub>H<sub>22</sub>NO<sub>2</sub>, 344.1656; found 344.1653.

**R<sub>f</sub>** = 0.25 (Hexane:EtOAc = 2:1), UV-active, blue spot (CAM).

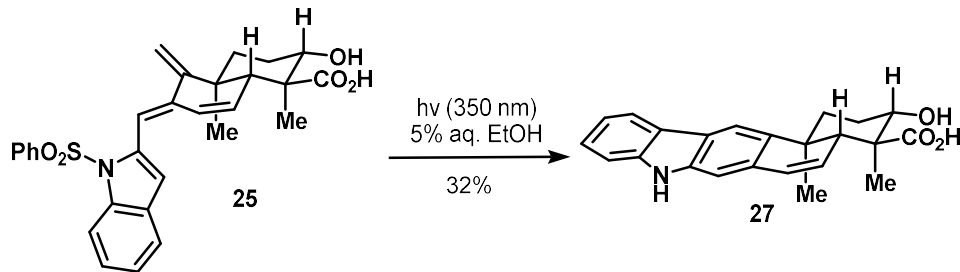

**(3*S*,4*S*,4*aR*,13*bS*)-3-Hydroxy-4,13*b*-dimethyl-2,3,4,4*a*,8,13*b*-hexahydro-1*H*-naphtho[2,1-*b*]carbazole-4-carboxylic acid (27):** A pyrex glass tube (11 cm tall, 1 cm diameter), equipped with a screw cap, was charged with a solution of acid **25** (43mg, 0.085 mmol, 1.0 equiv) in 5% aq. ethanol (9.50 mL). The vessel was degassed by bubbling a stream of nitrogen through the solution for 45 min. The mixture was then irradiated for 1.5 h with UV-A light (350 nm,) in a Luzchem photobox at room temperature. After reducing the EtOH *in vacuo*, the residue was dissolved in EtOAc, water, and sat. aq. NaCl. The aq. layer was extracted six times with EtOAc and the combined organic layers were dried over MgSO<sub>4</sub>, filtered and concentrated *in vacuo*. The crude material was purified by gradient flash chromatography (Yamazen, eluting with 0-10% MeOH in DCM) to afford 10 mg (32%) of acid **27** as a pale yellow solid. The stability of the product against irradiation with UV-A (350 nm) light was confirmed by irradiating 5.0 mg of **27** in 5% aq. EtOH (1.7 mL, 0.0080 M) for 2 h at room temperature. After the work-up described above, the material was fully recovered indicating no change by TLC and NMR analysis.

$[\alpha]_D^{22}$  -6.9 (*c* = 1.00, MeOH)

**<sup>1</sup>H-NMR** (700 MHz, CD<sub>3</sub>OD):  $\delta$  = 8.00 (d, *J* = 8.0 Hz, 1H), 7.85 (s, 1H), 7.39 (d, *J* = 8.0 Hz, 1H), 7.31 (t, *J* = 7.5 Hz, 1H), 7.14-7.10 (m, 2H), 6.70 (dd, *J* = 9.7, 2.7 Hz, 1H), 5.80 (d, *J* = 9.7 Hz, 1H), 4.18 (dd, *J* = 11.7, 4.2 Hz, 1H), 2.83 (br s, 1H), 2.49 (d, *J* = 12.4 Hz, 1H), 2.04-1.98 (m, 3H), 1.35 (s, 3H), 1.15 (s, 3H) ppm.

**<sup>13</sup>C-NMR** (176 MHz, CD<sub>3</sub>OD):  $\delta$  = 180.6, 142.0, 140.2, 139.9, 132.3, 131.0, 128.9, 126.2, 124.7, 123.8, 120.7, 119.6, 114.1, 111.6, 109.8, 75.7, 53.5, 49.6, 38.7, 35.9, 28.5, 22.3, 12.9 ppm.

**IR** (neat):  $\nu$  = 2926, 1699, 1447, 1371, 1243, 1144, 1075, 734, 588 cm<sup>-1</sup>.

**HRMS** (ESI, *m/z*): [M-H]<sup>-</sup> calcd. for C<sub>23</sub>H<sub>22</sub>NO<sub>3</sub>, 360.1605; found 360.1598.

**R<sub>f</sub>** = 0.35 (7% MeOH in DCM), UV-active, blue spot (CAM).

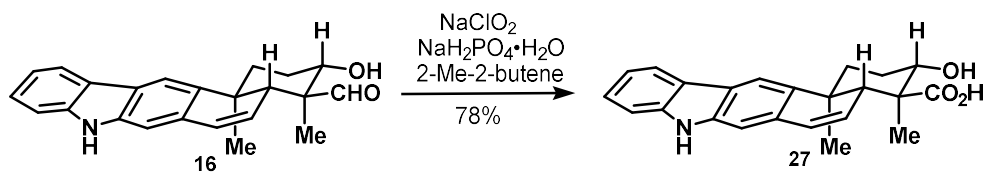

**(3*S*,4*S*,4*aR*,13*bS*)-3-Hydroxy-4,13*b*-dimethyl-2,3,4,4*a*,8,13*b*-hexahydro-1*H*-naphtho-[2,1-*b*]carbazole-4-carboxylic acid (**27**):** To a solution of the aldehyde **16** (90.7 mg, 0.263 mmol, 1.00 equiv) in acetone (3.50 mL), H<sub>2</sub>O (1.75 mL), and 2-Me-2-butene (335  $\mu$ L, 3.16 mmol, 12.0 equiv) was added a mixture of NaClO<sub>2</sub> (143 mg, 1.58 mmol, 6.00 equiv, ~90% techn.) and NaH<sub>2</sub>PO<sub>4</sub>·H<sub>2</sub>O (363 mg, 2.63 mmol, 10.0 equiv) at 0 °C. The mixture was warmed to room temperature and stirred for 2 h before being quenched by the addition of sat. aq. NaCl and sat. aq. NH<sub>4</sub>Cl (ca. 1:1). The mixture was transferred into a sep. funnel and solid NaCl was added. The aq. layer was then extracted six times with EtOAc and dried over MgSO<sub>4</sub>. After concentrating the solution *in vacuo*, the crude material was purified by gradient flash chromatography (Yamazen, eluting with 0-10% MeOH in DCM) to afford 74 mg (78%) of acid **27** as a yellow foam.

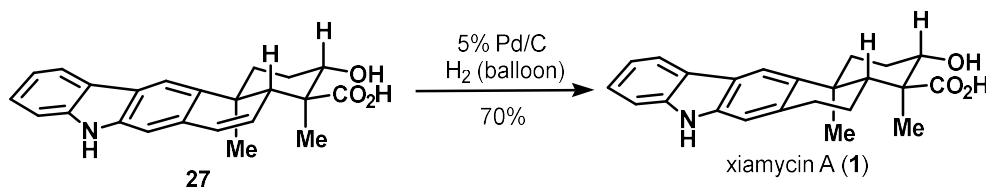

**Xiamycin A (**10**):** Hydrogen from a balloon was bubbled through a mixture of carbazole **27** (10 mg, 0.027 mmol, 1.0 equiv) and 5% Pd/C (9.0 mg, 0.080 mmol, 3.0 equiv) in MeOH (900  $\mu$ L) for 1 min. The mixture was then vigorously stirred under an atmosphere of hydrogen (balloon) for 3.5 h at room temperature. After filtering the mixture through celite (EtOAc/MeOH eluent), the solution was concentrated *in vacuo* and the crude material was purified by preparative thin layer chromatography (10% MeOH in DCM) to afford 7 mg (70%) of xiamycin A (**10**) as a pale yellow solid. The hydrogenation reaction can also be performed using crude carbazole **27** to give xiamycin A in the same overall yield (22%, 2 steps, 1 purification).

$[\alpha]_D^{22} +123.5$  ( $c = 0.40$ , MeOH); lit.<sup>2</sup>  $[\alpha]_D^{23} +137.6$  ( $c = 0.40$ , MeOH)

**<sup>1</sup>H-NMR** (700 MHz, CD<sub>3</sub>OD):  $\delta = 7.97$  (d,  $J = 8.0$  Hz, 1H), 7.94 (s, 1H), 7.35 (d,  $J = 8.0$  Hz, 1H), 7.29 (t,  $J = 7.9$  Hz, 1H), 7.09 (t,  $J = 7.5$  Hz, 1H), 7.07 (s, 1H), 4.10 (dd,  $J = 10.5, 7.5$  Hz, 1H), 3.15-3.08 (m, 1H), 3.08-2.99 (m, 1H), 2.64 (d,  $J = 12.8$  Hz, 1H), 2.14 (d,  $J = 11.8$  Hz, 1H), 2.08-1.98 (m, 1H), 1.93-1.88 (m, 2H), 1.78-1.72 (m, 1H), 1.58-1.53 (m, 1H), 1.30 (s, 3H), 1.25 (s, 3H) ppm.

**<sup>13</sup>C-NMR** (176 MHz, CD<sub>3</sub>OD):  $\delta = 181.3, 142.0, 141.8, 140.1, 134.0, 126.0, 124.6, 123.1, 120.6, 119.3, 116.4, 111.4, 110.8, 76.3, 54.9, 47.9, 39.0, 32.1, 28.7, 26.3, 22.6, 11.4$  ppm.

**IR** (neat):  $\nu = 3409, 2932, 1694, 1465, 1242, 1066$  cm<sup>-1</sup>.

**HRMS** (ESI,  $m/z$ ):  $[M-H]^-$  calcd. for C<sub>23</sub>H<sub>24</sub>NO<sub>3</sub>, 362.1762; found 362.1754.

$R_f = 0.25$  (7% MeOH in DCM), UV-active, blue spot (CAM).

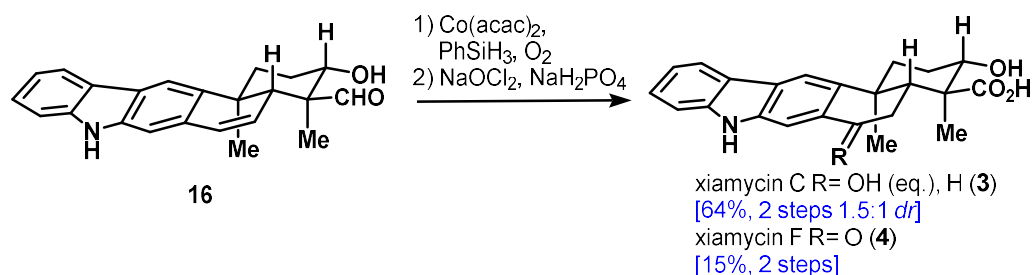

**Xiamycin C and F (10):** Oxygen from a balloon was bubbled through a mixture of carbazole **45** (15 mg, 0.043 mmol, 1.0 equiv), Co(acac)<sub>2</sub> (3.3 mg, 0.013 mmol, 0.30 equiv), and PhSiH<sub>3</sub> (8.0  $\mu$ L, 0.067 mmol, 1.5 equiv) in THF (900  $\mu$ L) for 1 min. The mixture was then stirred under an atmosphere of oxygen (balloon) for 12 h at room temperature. This mixture was then filtered through a silica plug with EtOAc and concentrated *in vacuo*. The crude mixture of diastereomeric alcohols and ketone was then directly subjected Pinnick oxidation conditions as the crude mixture decomposed upon all attempts at characterization and separation. The hydration reaction can also be performed with HFIP as the solvent which led to increased relative yield of the alcohols, and a shorter reaction time of 1 hour.

To a solution of the crude aldehydes in acetone (0.8 mL), H<sub>2</sub>O (0.4 mL), and 2-Me-2-butene (115  $\mu$ L, 1.1 mmol, 25 equiv) was added a mixture of NaClO<sub>2</sub> (27 mg, 0.3 mmol, 7.0 equiv, ~90% techn.) and NaH<sub>2</sub>PO<sub>4</sub>·H<sub>2</sub>O (60 mg, 0.44 mmol, 10 equiv) at 0 °C. The mixture was warmed to room temperature and stirred for 2 h before being quenched by the addition of sat.

aq. NaCl and sat. aq. NH<sub>4</sub>Cl (ca. 1:1). The mixture was transferred into a sep. funnel and solid NaCl was added. The aq. layer was then extracted six times with EtOAc and dried over MgSO<sub>4</sub>. After concentrating the solution in vacuo, the crude material was purified by preparatory thin layer chromatography (95:5:1 DCM:MeOH:AcOH) to afford 10.4 mg (64% 1.5:1 *dr*) xiamycin C as an amorphous yellow solid, and 2.4 mg (16%) xiamycin F as an amorphous yellow solid. Notably, the choice of solvent in the Mukaiyama hydration had a dramatic effect on the product distribution. Using HFIP led to the exclusive formation of the alcohols (i.e., 3 and its C19 epimer) in 90% yield

**Xiamycin C (3):**

$[\alpha]_D^{22} +120.6$  (c = 0.10, MeOH); lit.<sup>x</sup> $[\alpha]_D^{20} +123.6$ (c = 0.1, MeOH)

<sup>1</sup>H-NMR (600 MHz, CD<sub>3</sub>OD)  $\delta$ 8.00 (d, J = 7.7 Hz, 1H), 7.94 (s, 1H), 7.58 (s, 1H), 7.37 (d, J = 8.0 Hz, 1H), 7.31 (dd, J = 7.9, 8.0 Hz, 1H), 7.10 (d, J = 7.9, 8.0 Hz 1H), 4.89 (m, 1H), 4.09 (dd, J = 8.0, 6.6 Hz, 1H), 2.63 (ddd, J = 13.2, 3.4, 3.2, Hz, 1H), 2.19 (d, J = 12.6 Hz, 1H) ,2.09 – 1.95 (m, 2H), 1.93 – 1.82 (m, 3H), 1.75 – 1.65 (m, 1H), 1.38 (s, 3H), 1.26 (s, 3H).

<sup>13</sup>C-NMR (151MHz, CD<sub>3</sub>OD):  $\delta$  = 180.4, 142.3, 142.1, 140.1, 137.9, 126.3, 124.5, 124.0, 120.8, 119.3, 116.3, 111.5, 110.1, 76.8, 72.3, 55.1, 46.0, 39.2, 39.0, 33.3, 28.4, 26.9, 12.7.

IR (neat):  $\nu$  = 3670, 2932, 1684, 1352, 1242, 1066 cm<sup>-1</sup>.

HRMS (ESI, *m/z*): [M–H]<sup>-</sup> calcd. for C<sub>23</sub>H<sub>24</sub>NO<sub>4</sub>, 378.1711; found 378.1708.

R<sub>f</sub> = 0.18 (10% MeOH in DCM), UV-active, blue spot (CAM).

**C19epi-Xiamycin C:**

$[\alpha]_D^{22} +117.2$  (c = 0.40, MeOH);

<sup>1</sup>H-NMR (700 MHz, CD<sub>3</sub>OD):  $\delta$  = 7.97 (d, J = 8.0 Hz, 1H), 7.94 (s, 1H), 7.35 (d, J = 8.0 Hz, 1H), 7.29 (t, J = 7.9 Hz, 1H), 7.09 (t, J = 7.5 Hz, 1H), 7.07 (s, 1H), 4.10 (dd, J = 10.5, 7.5 Hz, 1H), 3.15-3.08 (m, 1H), 3.08-2.99 (m, 1H), 2.64 (d, J = 12.8 Hz, 1H), 2.14 (d, J = 11.8 Hz, 1H), 2.08-1.98 (m, 1H), 1.93-1.88 (m, 2H), 1.78-1.72 (m, 1H), 1.58-1.53 (m, 1H), 1.30 (s, 3H), 1.25 (s, 3H) ppm.

<sup>13</sup>C-NMR (176 MHz, CD<sub>3</sub>OD):  $\delta$  = 181.3, 142.0, 141.8, 140.1, 134.0, 126.0, 124.6, 123.1, 120.6, 119.3, 116.4, 111.4, 110.8, 76.3, 54.9, 47.9, 39.0, 32.1, 28.7, 26.3, 22.6, 11.4 ppm.

IR (neat):  $\nu$  = 3409, 2932, 1694, 1465, 1242, 1066 cm<sup>-1</sup>.

HRMS (ESI, *m/z*): [M–H]<sup>-</sup> calcd. for C<sub>23</sub>H<sub>24</sub>NO<sub>4</sub>, 378.1711; found 378.1708.

R<sub>f</sub> = 0.14 (10% MeOH in DCM), UV-active, blue spot (CAM).

**Xiamycin F (4):** $[\alpha]_D^{22} +130.1$  (c = 0.40, MeOH)

<sup>1</sup>H-NMR (700 MHz, CD<sub>3</sub>OD):  $\delta$  = 7.97 (d,  $J$  = 8.0 Hz, 1H), 7.94 (s, 1H), 7.35 (d,  $J$  = 8.0 Hz, 1H), 7.29 (t,  $J$  = 7.9 Hz, 1H), 7.09 (t,  $J$  = 7.5 Hz, 1H), 7.07 (s, 1H), 4.10 (dd,  $J$  = 10.5, 7.5 Hz, 1H), 3.15-3.08 (m, 1H), 3.08-2.99 (m, 1H), 2.64 (d,  $J$  = 12.8 Hz, 1H), 2.14 (d,  $J$  = 11.8 Hz, 1H), 2.08-1.98 (m, 1H), 1.93-1.88 (m, 2H), 1.78-1.72 (m, 1H), 1.58-1.53 (m, 1H), 1.30 (s, 3H), 1.25 (s, 3H) ppm.

<sup>13</sup>C-NMR (226 MHz, CD<sub>3</sub>OD):  $\delta$  = 201.1, 180.1, 147.7, 144.0, 139.6, 130.1, 129.4, 128.8, 123.8, 122.3, 120.4, 116.2, 112.3, 110.7, 76.0, 54.3, 46.9, 38.8, 38.7, 38.3, 28.4, 24.9, 11.1

IR (neat):  $\nu$  = 3411, 2945, 1694, 1646, 1470, 1240, 1070 cm<sup>-1</sup>.

HRMS (ESI,  $m/z$ ): [M-H]<sup>-</sup> calcd. for C<sub>23</sub>H<sub>22</sub>NO<sub>4</sub>, 376.1554; found 376.1552.

R<sub>f</sub> = 0.34 (10% MeOH in DCM), UV-active, blue spot (CAM).

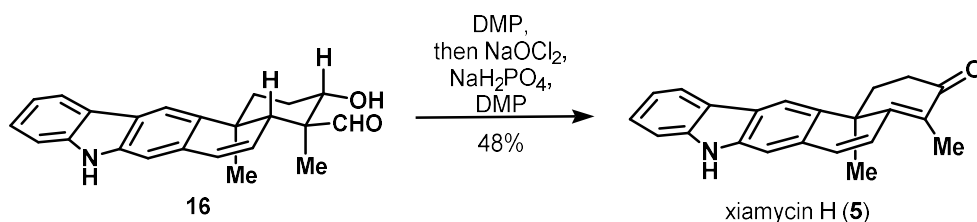

**Xiamycin H (5):** Dess-Martin periodinane (14 mg, 0.032 mmol, 1.1 equiv) (DMP) was added to a solution of carbazole **16** (10 mg, 0.029 mmol, 1.0 equiv) in DCM (900  $\mu$ L). The mixture was then vigorously stirred at room temperature for 30 minutes. To this mixture mixture was added acetone (900  $\mu$ L), water (450  $\mu$ L) and 2-Me-2-butene (85  $\mu$ L, 0.8 mmol, 25 equiv), followed by NaOCl<sub>2</sub> (18 mg, 0.3 mmol, 7.0 equiv, ~90% techn.), NaH<sub>2</sub>PO<sub>4</sub>•H<sub>2</sub>O (40 mg, 0.29 mmol, 10 equiv), and DMP (25 mg, 0.058 mmol, 2 equiv). This yellow heterogenous mixture was stirred vigorously at room temperature for 3 hours. The reaction mixture was diluted with sat. aq. NaCl and extracted 3 times with EtOAc. The combined organic layers were dried over MgSO<sub>4</sub>, filtered, and concentrated *in vacuo*. The crude material was purified by preparative thin layer chromatography (30% EtOAc in Hexanes) to afford 4.3 mg (48%) of xiamycin H (**5**) as a bright yellow amorphous solid.

Comparison of the spectral data for xiamycin H to the natural sample<sup>5</sup> showed strong agreement in the <sup>1</sup>H-NMR, but poor resolution made comparison of the <sup>13</sup>CNMR difficult (presumably due to its sparing solubility in CD<sub>3</sub>OD).

$[\alpha]_D^{22} +41.5$  ( $c = 0.40$ ,  $\text{CHCl}_3$ );

$^1\text{H-NMR}$  (600 MHz,  $\text{CD}_3\text{OD}$ )  $\delta = 8.16$  (s, 1H), 8.06 (d,  $J = 7.9$  Hz, 1H), 7.42 (d,  $J = 8.1$  Hz, 1H), 7.40 – 7.32 (m, 2H), 7.15 (t,  $J = 7.5$  Hz, 1H), 7.05 (d,  $J = 9.8$  Hz, 1H), 6.76 (d,  $J = 9.8$  Hz, 1H), 3.00 – 2.95 (m, 1H), 2.89 – 2.82 (m, 1H), 2.71 – 2.64 (m, 1H), 2.38 – 2.32, 1.92 (s, 3H), 1.49 (s, 3H).

$^{13}\text{C NMR}$  (151 MHz, MeOD)  $\delta = 200.5$ , 160.2, 156.3, 142.5, 140.1, 137.8, 136.6, 130.1, 129.4, 127.0, 125.0, 124.3, 123.4, 121.1, 120.0, 116.5, 111.8, 40.6, 35.1, 34.9, 31.3, 10.6.

**IR** (neat):  $\nu = 2932$ , 1644, 1602, 1558, 1465, 1242, 1066  $\text{cm}^{-1}$ .

**HRMS** (ESI,  $m/z$ ):  $[\text{M}-\text{H}]^-$  calcd. for  $\text{C}_{22}\text{H}_{18}\text{NO}$ , 312.1394; found 312.1392.

$R_f = 0.4$  (33% EtOAc in Hexanes), UV-active, visibly yellow spot.

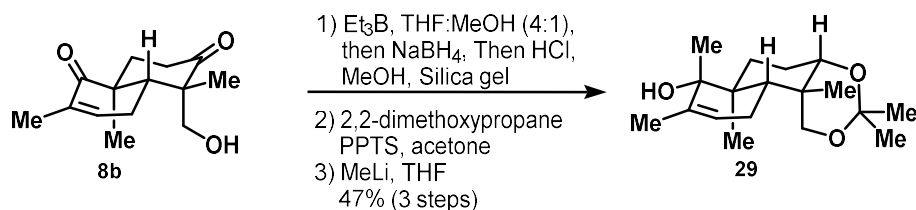

**(4a*S*,5*S*,6*S*,8a*S*)-6-hydroxy-5-(hydroxymethyl)-2,5,8a-trimethyl-4a,5,6,7,8,8a-**

**hexahydronaphthalen-1(4*H*)-one (18):**  $\text{Et}_3\text{B}$  (7.81 mL of a 1.00M THF solution, 1.10 equiv) was added to a mixture of THF (56.8 mL) and MeOH (14.2 mL) under a  $\text{N}_2$  atmosphere and the resulting colorless solution was stirred for 1 hour at room temperature. The solution was cooled to  $-78$   $^\circ\text{C}$  after which 1.70 g of ketone **8b** (7.10 mmol, 1.00 equiv) in THF (10.0 mL) was added dropwise and stirred at  $-78$   $^\circ\text{C}$  for 30 minutes.  $\text{NaBH}_4$  (402 mg, 10.6 mmol, 1.50 equiv) was added as a solid and the resulting solution was stirred at  $-78$   $^\circ\text{C}$  for 3 hours. The solution was diluted with EtOAc and quenched by the addition of sat. aq.  $\text{NH}_4\text{Cl}$ . The aq. layer was extracted three times with EtOAc and the combined organic layers were washed with sat. aq. NaCl, and dried over  $\text{MgSO}_4$ . After the removal of solvent *in vacuo* the resulting boronate ester was loaded onto a silica gel column that was further acidified with conc. HCl, and eluted with methanol. After removal of solvent *in vacuo* this material was used in the next reaction without further purification. An analytical sample was prepared by flash column chromatography (PE:EtOAc = 1:1) to afford diol **18** as a white solid. Suitable crystals for X-ray analysis were obtained after crystallization from a Hexane/EtOAc (1:1) solution.

**(4a*S*,6a*S*,10a*S*,10b*S*)-3,3,6a,8,10b-pentamethyl-1,4a,5,6,6a,10,10a,10b-octahydro-7H-naphtho[2,1-d][1,3]dioxin-7-one (28):** To a solution of crude diol in acetone (98.0 mL, 80.0 mM) was added PPTS (490 mg, 1.95 mmol, 0.250 equiv), followed by 2,2-dimethoxypropane (9.80 mL, 78.1 mmol, 10.0 equiv) at room temperature. After stirring for 14 h, the reaction mixture was quenched by the addition of sat. aq. NaHCO<sub>3</sub>. The aq. layer was extracted three times with EtOAc, washed with sat. aq. NaCl solution and dried over MgSO<sub>4</sub>. After removal of the solvent *in vacuo*, this material was used in the next reaction without further purification. An analytical sample was prepared by flash column chromatography (PE:EtOAc = 3:1) to afford acetone 28 as a white solid.

**(4a*S*,6a*S*,7*S*,10a*S*,10b*S*)-3,3,6a,7,8,10b-hexamethyl-4a,5,6,6a,7,10,10a,10b-octahydro-1H-naphtho[2,1-d][1,3]dioxin-7-ol (29):** MeLi (10.7 mL of a 1.60 M Et<sub>2</sub>O solution, 17.2 mmol, 2.20 equiv) was added dropwise to a solution of the crude acetone in THF (78.0 mL, 0.100 M) at -78 °C. After being stirred for 1.5 h at -78 °C, the reaction mixture was quenched by the addition of sat. aq. NH<sub>4</sub>Cl. The aq. layer was extracted three times with EtOAc, washed with sat. aq. NaCl solution and dried over MgSO<sub>4</sub>. After removal of the solvent *in vacuo*, the residue was purified by gradient flash chromatography (Yamazen, eluting with 13-34% EtOAc in hexanes) to afford 1.09 g (47%, over 3 steps) of alcohol 29 as a white solid.

**(4a*S*,5*S*,6*S*,8a*S*)-6-hydroxy-5-(hydroxymethyl)-2,5,8a-trimethyl-4a,5,6,7,8,8a-hexahydronaphthalen-1(4H)-one (18):**

$[\alpha]_D^{22} -28.2$  (c = 1.00, MeOH)

<sup>1</sup>H-NMR (400 MHz, CDCl<sub>3</sub>) δ = 6.67 (dt, *J* = 6.1, 1.9 Hz, 1H), 4.26 (d, *J* = 11.0 Hz, 1H), 3.72 (s, 2H), 3.48 (d, *J* = 11.0 Hz, 1H), 3.45-3.36 (m, 1H), 2.43-2.30 (m, 1H), 2.19 (ddt, *J* = 19.0, 11.7, 2.5 Hz, 1H), 1.91 (d, *J* = 14.1 Hz, 1H), 1.86-1.76 (m, 2H), 1.70 (dt, *J* = 2.8, 1.4 Hz, 3H), 1.64 (dd, *J* = 11.7, 4.2 Hz, 1H), 1.51-1.40 (m, 1H), 1.21 (s, 3H), 0.95 (s, 3H) ppm.

<sup>13</sup>C-NMR (126 MHz, CDCl<sub>3</sub>) δ = 205.2, 143.8, 133.0, 80.0, 64.4, 48.8, 44.4, 42.5, 31.5, 27.3, 23.9, 21.9, 18.1, 16.3 ppm.

IR (neat): ν = 3417, 2944, 1660, 1353, 1032, 991, 739, 547 cm<sup>-1</sup>.

HRMS (EI, *m/z*): [M]<sup>+</sup> calcd. for C<sub>14</sub>H<sub>22</sub>O<sub>3</sub>, 238.1569; found 238.1572.

R<sub>f</sub> = 0.22 (Hexane:EtOAc = 1:3), UV-active, blue spot (CAM).

M.p. = 136 °C

**(4a*S*,6a*S*,10a*S*,10b*S*)-3,3,6a,8,10b-pentamethyl-1,4a,5,6,6a,10,10a,10b-octahydro-7H-naphtho[2,1-d][1,3]dioxin-7-one (28):**



$[\alpha]_D^{22} -42.7$  ( $c = 1.00$ , MeOH)

$^1\text{H-NMR}$  (700 MHz,  $\text{CDCl}_3$ )  $\delta = 6.64$  (d,  $J = 5.9$  Hz, 1H), 4.06 (d,  $J = 11.4$  Hz, 1H), 3.47 (dd,  $J = 8.4, 3.6$  Hz, 1H), 3.28 (d,  $J = 11.5$  Hz, 1H), 2.30 (dt,  $J = 18.9, 5.1$  Hz, 1H), 2.16 (ddt,  $J = 18.8, 11.8, 2.5$  Hz, 1H), 1.96 (dtd,  $J = 13.2, 8.1, 4.6$  Hz, 1H), 1.88 (ddd,  $J = 13.5, 7.9, 5.2$  Hz, 1H), 1.78 (ddd,  $J = 13.9, 8.4, 4.6$  Hz, 1H), 1.74 (d,  $J = 2.7$  Hz, 3H), 1.69 (dt,  $J = 12.0, 5.4$  Hz, 2H), 1.42 (s, 3H), 1.36 (s, 3H), 1.18 (s, 6H) ppm.

$^{13}\text{C-NMR}$  (176 MHz,  $\text{CDCl}_3$ )  $\delta = 204.7, 142.6, 133.4, 99.2, 75.7, 64.2, 45.9, 44.0, 37.7, 27.8, 26.9, 25.2, 25.1, 24.2, 23.3, 19.8, 16.5$  ppm.

**IR** (neat):  $\nu = 2988, 2949, 2876, 1670, 1445, 1432, 1247, 1153, 1077, 864$   $\text{cm}^{-1}$ .

**HRMS** (EI,  $m/z$ ):  $[\text{M}+\text{H}]^+$  calcd. for  $\text{C}_{17}\text{H}_{27}\text{O}_3$ , 279.1960; found 279.1959.

$R_f = 0.49$  (Hexane:EtOAc = 2:1), UV-active, blue spot (CAM).

**(4a*S*,6a*S*,7*S*,10a*S*,10b*S*)-3,3,6a,7,8,10b-hexamethyl-4a,5,6,6a,7,10,10a,10b-octahydro-1H-naphtho[2,1-d][1,3]dioxin-7-ol (29):**

$[\alpha]_D^{22} -33.2$  ( $c = 1.00$ , MeOH)

$^1\text{H-NMR}$  (600 MHz,  $\text{CDCl}_3$ )  $\delta = 5.33$  (ddt,  $J = 3.8, 2.5, 1.4$  Hz, 1H), 4.08 (d,  $J = 11.4$  Hz, 1H), 3.51 (dd,  $J = 7.9, 3.1$  Hz, 1H), 3.23 (d,  $J = 11.4$  Hz, 1H), 1.98 (dd,  $J = 17.4, 1.6$  Hz, 1H), 1.94-1.88 (m, 1H), 1.82-1.73 (m, 1H), 1.72-1.50 (m, 8H), 1.42 (s, 3H), 1.37 (s, 3H), 1.28 (s, 3H), 1.17 (s, 3H), 1.11 (s, 3H) ppm.

$^{13}\text{C-NMR}$  (151 MHz,  $\text{CDCl}_3$ )  $\delta = 138.68, 121.41, 98.99, 78.09, 76.02, 64.14, 42.44, 39.35, 37.37, 27.37, 26.59, 26.09, 25.19, 25.11, 23.09, 22.88, 17.97, 17.83$  ppm.

**IR** (neat):  $\nu = 3511, 2986, 2961, 2952, 2897, 1454, 1378, 1250, 1098$   $\text{cm}^{-1}$ .

**HRMS** (EI,  $m/z$ ):  $[\text{M}]^+$  calcd. for  $\text{C}_{18}\text{H}_{30}\text{O}_3$ , 294.2195; found 294.2199.

$R_f = 0.46$  (Hexane:EtOAc = 2:1), non UV-active, blue spot (CAM).

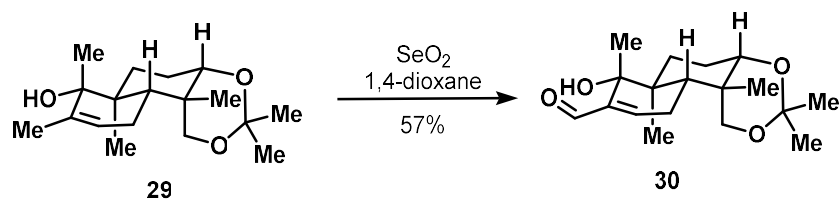

**(4a*S*,6a*S*,7*R*,10a*S*,10b*S*)-7-hydroxy-3,3,6a,7,10b-pentamethyl-4a,5,6,6a,7,10,10a,10b-octahydro-1*H*-naphtho[2,1-*d*][1,3]dioxine-8-carbaldehyde (29):** A mixture of alcohol **29** (1.00 g, 3.40 mmol, 1.00 equiv) and selenium dioxide (940 mg, 8.50 mmol, 2.50 equiv) was dissolved in 1,4-dioxane (34.0 mL, 0.100 M) and then placed in an oil bath at 90 °C. After stirring for 2 h, the resulting brown mixture was cooled to room temperature and quenched by the addition of distilled water. The aq. phase was extracted three times with EtOAc and the combined organic layers were washed with sat. aq. NaCl solution. The solution was dried over MgSO<sub>4</sub> and concentrated *in vacuo*. The crude products were purified by gradient flash chromatography (Yamazen, eluting with 13-34% EtOAc in hexanes) to afford 600 mg of aldehyde **30** (57%) as an orange solid, in this case no allylic alcohol was isolated.

**(4a*S*,6a*S*,7*R*,10a*S*,10b*R*)-7-Hydroxy-3,3,6a,7,10b-pentamethyl-4a,5,6,6a,7,10,10a,10b-octahydro-1*H*-naphtho[2,1-*d*][1,3]dioxine-8-carbaldehyde (30):**

$[\alpha]_D^{22} -119.1$  ( $c = 1.00$ , MeOH)

<sup>1</sup>H-NMR (500 MHz, CDCl<sub>3</sub>)  $\delta = 9.39$  (s, 1H), 6.73 (dd,  $J = 4.7, 2.5$  Hz, 1H), 4.14 (d,  $J = 11.3$  Hz, 1H), 3.57 (dd,  $J = 7.8, 2.8$  Hz, 1H), 3.28 (d,  $J = 11.3$  Hz, 1H), 2.45 (dt,  $J = 20.4, 5.0$  Hz, 1H), 2.26-2.16 (m, 1H), 1.94 (dd,  $J = 13.7, 5.6$  Hz, 1H), 1.86 -1.77 (m, 1H), 1.69 (ddt,  $J = 17.3, 12.1, 7.1$  Hz, 3H), 1.45 (d,  $J = 4.9$  Hz, 6H), 1.41 (s, 3H), 1.23 (s, 3H), 1.16 (s, 3H) ppm.

<sup>13</sup>C-NMR (176 MHz, CDCl<sub>3</sub>)  $\delta = 196.24, 151.67, 144.98, 99.27, 76.08, 75.61, 64.00, 41.22, 39.01, 37.32, 26.45, 26.33, 26.08, 25.17, 24.92, 24.87, 18.18$  ppm.

IR (neat):  $\nu = 3515, 2988, 2944, 2899, 1739, 1670, 1638, 1457, 1286, 1221, 1208, 1157, 863$  cm<sup>-1</sup>.

HRMS (ESI,  $m/z$ ):  $[M-H]^-$  calcd. for C<sub>18</sub>H<sub>27</sub>O<sub>4</sub>, 307.1915; found 307.1916.

R<sub>f</sub> = 0.54 (Hexane:EtOAc = 1:1), UV-active, blue spot (CAM).

M.p. = 184°C

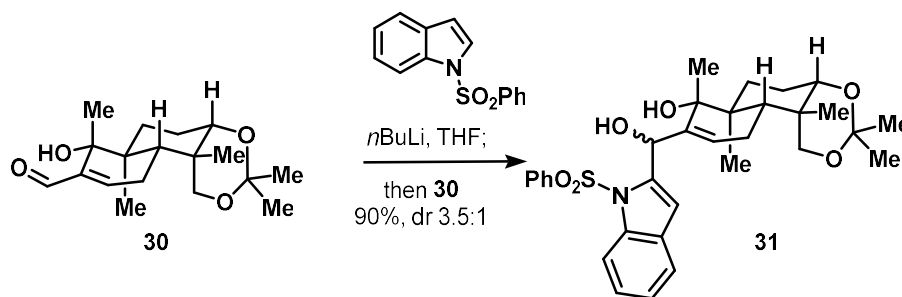

**(4a*S*,6a*S*,7*R*,10a*S*,10b*S*)-8-(hydroxy(1-(phenylsulfonyl)-1*H*-indol-2-yl)methyl)-3,3,6a,7,10b-pentamethyl-4a,5,6,6a,7,10,10a,10b-octahydro-1*H*-naphtho[2,1-*d*][1,3]dioxin-7-ol (31):** Trace water was removed from 1-(phenylsulfonyl)-1*H*-indole (1.17 g, 4.55 mmol, 3.50 equiv) via azeotropic distillation with benzene. Then, it was dissolved in THF (30.0 mL) and cooled to  $-78^{\circ}\text{C}$ . A solution of *n*BuLi (2.80 mL of a 1.60 M solution in pentane, 4.49 mmol, 3.45 equiv) was added dropwise. The yellow solution was stirred at  $0^{\circ}\text{C}$  for 1 h. During this time, trace water was removed from aldehyde **30** (400 mg, 1.30 mmol, 1.00 equiv) via azeotropic distillation with benzene. Then it was dissolved in THF (8.00 mL) and added via cannula transfer into the solution containing the 2-lithio-indole over the course of 5 minutes at  $-78^{\circ}\text{C}$ . After stirring the resulting solution at  $-78^{\circ}\text{C}$  for 1 h, the solution was warmed to  $0^{\circ}\text{C}$  and stirred additional 1 h before being quenched with sat. aq.  $\text{NH}_4\text{Cl}$ . The aq. layer was extracted three times with EtOAc and the combined organic layers were washed with sat. aq. NaCl, dried over  $\text{MgSO}_4$ , filtered, and concentrated. The residue was purified via gradient flash chromatography (Yamazen, eluting with 46-67% EtOAc in hexanes) to yield a mixture of diastereomers of alcohol **31** as a yellow foam (661 mg, 90% combined yield, *dr* = 3.5:1) which was used in the next reaction. Analytical samples were prepared via gradient flash chromatography (Yamazen, eluting with 39-59% EtOAc in hexanes).

**Major isomer:**

$[\alpha]_{\text{D}}^{22} -25.4$  (*c* = 1.00, MeOH)

$^1\text{H-NMR}$  (700 MHz,  $\text{CDCl}_3$ )  $\delta$  = 8.16 (d, *J* = 8.4 Hz, 1H), 7.80-7.75 (m, 2H), 7.56-7.50 (m, 2H), 7.45-7.39 (m, 2H), 7.34-7.30 (m, 1H), 7.27 (t, *J* = 7.5 Hz, 1H), 6.94 (s, 1H), 6.19 (s, 1H), 5.15 (dd, *J* = 4.8, 2.5 Hz, 1H), 4.07 (d, *J* = 11.5 Hz, 2H), 3.56 (dd, *J* = 7.7, 3.1 Hz, 1H), 3.20 (d, *J* = 11.4 Hz, 1H), 2.33 (s, 1H), 2.02-1.91 (m, 2H), 1.79-1.62 (m, 6H), 1.59 (s, 3H), 1.45 (s, 3H), 1.41 (s, 3H), 1.28 (s, 1H), 1.21 (s, 3H), 1.17 (s, 3H) ppm.

$^{13}\text{C-NMR}$  (176 MHz,  $\text{CDCl}_3$ )  $\delta$  = 142.2, 142.0, 138.6, 137.5, 133.7, 129.5, 129.2, 126.3, 125.6, 124.6, 123.9, 121.0, 114.9, 112.4, 99.2, 79.9, 75.7, 67.9, 64.1, 60.4, 41.8, 39.7, 37.5, 27.1, 26.4, 26.0, 25.3, 25.0, 24.6, 22.8, 18.2, 14.2 ppm.

**IR** (neat):  $\nu$  = 3460, 2986, 2933, 1447, 1372, 1173, 1091, 1020, 726, 592  $\text{cm}^{-1}$ .

**HRMS** (ESI, *m/z*):  $[\text{M-H}]^-$  calcd. for  $\text{C}_{32}\text{H}_{38}\text{NO}_6\text{S}$ , 564.2425; found 564.2422.

$R_f$  = 0.35 (Hexane:EtOAc = 1:1), UV-active, blue spot (CAM).

**Minor isomer:**

$[\alpha]_{\text{D}}^{22} +31.1$  (*c* = 0.4, MeOH)

$^1\text{H NMR}$  (500 MHz, Chloroform-*d*)  $\delta$  8.08 (d, *J* = 8.3 Hz, 1H), 7.87 – 7.81 (m, 2H), 7.56 – 7.51 (m, 1H), 7.49 – 7.41 (m, 3H), 7.30 (dd, *J* = 7.3, 1.4 Hz, 1H), 7.24 (d, *J* = 7.5 Hz, 1H), 6.78 (s,

1H), 6.05 (d, J = 5.4 Hz, 1H), 5.82 (dd, J = 4.9, 2.4 Hz, 1H), 4.08 (d, J = 11.3 Hz, 1H), 3.54 (dd, J = 7.3, 3.1 Hz, 1H), 3.22 (d, J = 11.2 Hz, 1H), 2.96 (d, J = 5.6 Hz, 1H), 2.14 (dt, J = 18.2, 4.9 Hz, 1H), 1.93 (d, J = 18.0 Hz, 3H), 1.74 (dd, J = 11.7, 5.0 Hz, 2H), 1.68 – 1.59 (m, 2H), 1.44 (d, J = 16.4 Hz, 9H), 1.17 (d, J = 7.4 Hz, 6H) ppm.

<sup>13</sup>C-NMR (151 MHz, CDCl<sub>3</sub>): δ = 144.2, 143.5, 138.4, 137.6, 134.1, 129.5, 129.1, 126.7, 126.2, 125.1, 124.1, 121.2, 114.9, 111.3, 99.4, 78.2, 75.5, 66.2, 64.5, 42.1, 39.8, 37.7, 27.0, 26.3, 26.2, 25.3, 25.1, 24.4, 23.2, 18.7 ppm.

IR (neat): ν = 3460, 2986, 2933, 1447, 1372, 1173, 1091, 1020, 726, 592 cm<sup>-1</sup>.

HRMS (ESI, m/z): [M+Na]<sup>+</sup> calcd. for NaC<sub>32</sub>H<sub>37</sub>NO<sub>6</sub>S, 588.2390; found 588.2396.

R<sub>f</sub> = 0.33 (Hexane:EtOAc = 1:1), UV-active, blue spot (CAM).

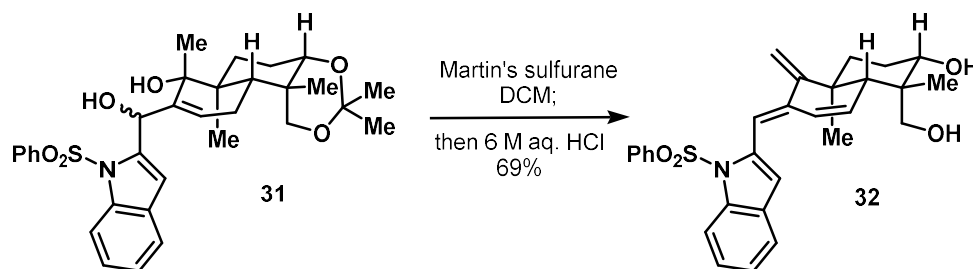

**(1S,2S,4aS,8aR,E)-1-(hydroxymethyl)-1,4a-dimethyl-5-methylene-6-((1-(phenylsulfonyl)-1H-indol-2-yl)methylene)-1,2,3,4,4a,5,6,8a-octahydronaphthalen-2-ol (32):** Martin's sulfurane (1.43 g, 2.12 mmol, 2.40 equiv) was added as a solid to a solution of alcohol **31** (500 mg, 0.885 mmol, 1.00 equiv) in DCM (8.90 mL, 0.100 M) at room temperature. After being stirred for 25 min, an aq. solution of 6 M HCl (8.90 mL) was added at 0 °C. The resulting brown solution was stirred at room temperature for 1.5 h before being quenched by the addition of sat. aq. NaHCO<sub>3</sub> at 0 °C. The mixture was warmed to room temperature and additional sat. aq. NaHCO<sub>3</sub> was added under stirring until the gas evolution ceased. The mixture was transferred into a sep. funnel and solid NaCl was added. The aq. layer was then extracted four times with EtOAc and dried over MgSO<sub>4</sub>. After removal of the solvent *in vacuo*, the crude material was purified by gradient flash chromatography (Yamazen, eluting with 50-70% EtOAc in hexanes) affording 299 mg (69%) of diol **32** as an orange foam.

**(1S,2S,4aS,8aR,E)-1-(hydroxymethyl)-1,4a-dimethyl-5-methylene-6-((1-(phenylsulfonyl)-1H-indol-2-yl)methylene)-1,2,3,4,4a,5,6,8a-octahydronaphthalen-2-ol (32):**

$[\alpha]_D^{22} -148.0$  ( $c = 1.00$ , MeOH)

$^1\text{H-NMR}$  (700 MHz,  $\text{CDCl}_3$ )  $\delta = 8.27$  (d,  $J = 8.4$  Hz, 1H), 7.70 (dd,  $J = 8.0, 1.3$  Hz, 2H), 7.50 (t,  $J = 7.5$  Hz, 1H), 7.46 (d,  $J = 7.7$  Hz, 1H), 7.37-7.31 (m, 2H), 7.27 (t,  $J = 7.5$  Hz, 1H), 7.08 (s, 1H), 6.58 (s, 1H), 6.55 (dd,  $J = 10.1, 3.3$  Hz, 1H), 5.90 (dd,  $J = 10.1, 2.1$  Hz, 1H), 5.32 (s, 1H), 4.86 (s, 1H), 4.30 (d,  $J = 11.6$  Hz, 1H), 3.62 (dd,  $J = 11.5, 4.8$  Hz, 1H), 3.41 (d,  $J = 11.6$  Hz, 1H), 2.26 (s, 1H), 2.07-2.01 (m, 1H), 1.99 (dq,  $J = 9.1, 4.1$  Hz, 1H), 1.88 (dt,  $J = 13.1, 3.5$  Hz, 1H), 1.81 (td,  $J = 13.3, 3.8$  Hz, 1H), 1.34 (s, 3H), 1.06 (s, 3H) ppm.

$^{13}\text{C-NMR}$  (125 MHz,  $\text{CDCl}_3$ ):  $\delta = 156.7, 138.6, 138.5, 137.2, 137.1, 133.7, 131.1, 130.1, 129.1, 126.7, 125.9, 125.1, 124.2, 120.7, 115.3, 115.1, 113.6, 105.8, 76.7, 71.1, 47.6, 42.0, 40.2, 33.9, 27.5, 20.1, 11.6$  ppm.

**IR** (neat):  $\nu = 3386, 2960, 2919, 1449, 1371, 1174, 1120, 1090, 725, 570$   $\text{cm}^{-1}$ .

**HRMS** (ESI,  $m/z$ ):  $[\text{M}-\text{H}]^-$  calcd. for  $\text{C}_{29}\text{H}_{28}\text{NSO}_4$ , 488.1901; found 488.1897.

$R_f = 0.21$  (Hexane:EtOAc = 1:2), UV-active, blue spot (CAM).

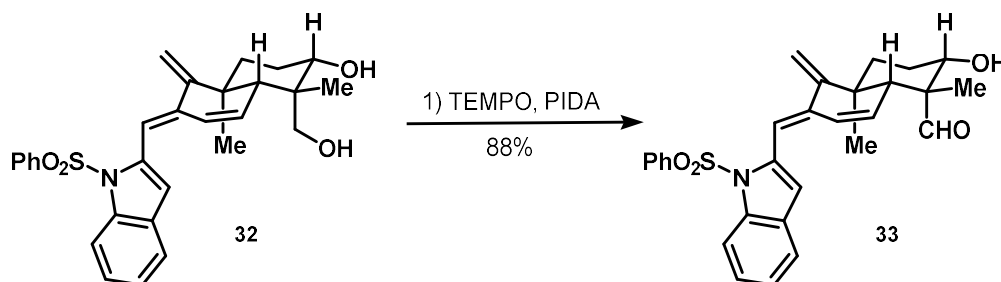

**(1R,2S,4aS,8aR,E)-2-hydroxy-1,4a-dimethyl-5-methylene-6-((1-(phenylsulfonyl)-1H-indol-2-yl)methylene)-1,2,3,4,4a,5,6,8a-octahydronaphthalene-1-carbaldehyde (33)**: To a solution of diol **32** (210 mg, 0.440 mmol, 1.00 equiv) in DCM (3.60 mL) and  $\text{H}_2\text{O}$  (3.60 mL) was added TEMPO (89.0 mg, 0.570 mmol, 1.30 equiv), followed by PIDA (183 mg, 0.570 mmol, 1.30 equiv) as solids in one portion. The resulting orange-brown mixture was vigorously stirred for 4 h at room temperature before being quenched by the addition of sat. aq.  $\text{NaHCO}_3$  and sat. aq.  $\text{Na}_2\text{S}_2\text{O}_3$  (ca. 4:1). The mixture was transferred into a sep. funnel and solid NaCl was added. The aq. layer was then extracted four times with EtOAc, washed with sat. aq. NaCl, dried over  $\text{MgSO}_4$ , and filtered. After removal of the solvent *in vacuo*, the crude material was

purified by gradient flash chromatography (Yamazen, eluting with 30-50% EtOAc in hexanes) affording aldehyde **33** (185 mg, 88%) as a pale orange foam.

**(1*R*,2*S*,4*aS*,8*aR*,*E*)-2-hydroxy-1,4*a*-dimethyl-5-methylene-6-((1-(phenylsulfonyl)-1*H*-indol-2-yl)methylene)-1,2,3,4,4*a*,5,6,8*a*-octahydronaphthalene-1-carbaldehyde (**33**):**

$[\alpha]_D^{22} -125.6$  ( $c = 1.00$ , MeOH)

$^1\text{H NMR}$  (600 MHz,  $\text{CDCl}_3$ )  $\delta = 9.77$  (s, 1H), 8.24 (d,  $J = 8.5$  Hz, 1H), 7.67 (d,  $J = 7.9$  Hz, 2H), 7.47 (t,  $J = 7.5$  Hz, 1H), 7.44 (d,  $J = 7.9$  Hz, 1H), 7.32 (dt,  $J = 14.9, 7.8$  Hz, 3H), 7.24 (d,  $J = 7.6$  Hz, 1H), 7.11 (s, 1H), 6.64-6.58 (m, 1H), 6.57 (s, 1H), 6.08 (d,  $J = 10.2$  Hz, 1H), 5.39 (s, 1H), 4.92 (s, 1H), 3.35 (s, 1H), 3.22 (d,  $J = 10.3$  Hz, 1H), 2.32 (s, 1H), 2.12 (dt,  $J = 13.9, 4.2$  Hz, 1H), 2.05-1.96 (m, 1H), 1.92-1.86 (m, 1H), 1.80 (td,  $J = 13.4, 3.7$  Hz, 1H), 1.39 (s, 3H), 1.32-1.21 (m, 1H), 0.98 (s, 3H).

$^{13}\text{C-NMR}$  (151 MHz,  $\text{CDCl}_3$ )  $\delta = 207.5, 154.8, 138.4, 137.7, 137.1, 136.5, 133.6, 129.9, 128.9, 128.2, 126.5, 126.1, 125.1, 124.0, 120.6, 116.0, 115.1, 113.5, 106.9, 53.4, 52.2, 39.9, 34.0, 28.6, 19.1, 18.9$  ppm.

**IR** (neat):  $\nu = 3536, 2976, 2932, 2919, 1734, 1448, 1371, 1173, 1119, 1074, 724, 507$   $\text{cm}^{-1}$ .

**HRMS** (ESI,  $m/z$ ):  $[\text{M}-\text{H}]^-$  calcd. for  $\text{C}_{29}\text{H}_{28}\text{NSO}_4$ , 486.1745; found 486.1741.

$R_f = 0.18$  (Hexane:EtOAc = 2:1), UV-active, blue spot (CAM).

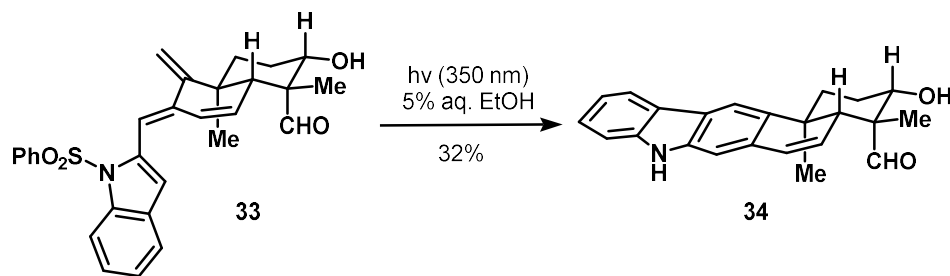

**(3*S*,4*R*,4*aR*,13*bS*)-3-hydroxy-4,13*b*-dimethyl-2,3,4,4*a*,8,13*b*-hexahydro-1*H*-naphtho[2,1-*b*]carbazole-4-carboxylic acid (**34**):** A pyrex glass tube (11 cm tall, 1 cm diameter), equipped with a screw cap, was charged with a solution of aldehyde **33** (90.0 mg, 0.184 mmol, 1.00 equiv) in 5% aq. ethanol (9.00 mL, 20.0 mM). The vessel was degassed by bubbling a stream of nitrogen through the solution for 45 min. The mixture was then irradiated for 4 h with UV-A light (350 nm) in a Luzchem photobox at room temperature. After reducing the EtOH *in vacuo*, the residue was dissolved in EtOAc and sat. aq. NaCl. The aq. layer was extracted four times with EtOAc and the combined organic layers were dried over  $\text{MgSO}_4$ , filtered and

concentrated *in vacuo* the crude material was purified by gradient flash chromatography (Yamazen, eluting with 13-42% EtOAc in Hexanes) provided 20 mg (36%) of carbazole **34** as a white foam.

$[\alpha]_D^{22}$  –181.1 (*c* = 1.00, MeOH)

$^1\text{H-NMR}$  (400 MHz,  $\text{CDCl}_3$ ):  $\delta$  = 9.96 (s, 1H), 8.06–8.02 (m, 2H), 7.88 (s, 1H), 7.39 (m 2H), 7.26 – 7.22 (m, 1H), 7.12 (s, 1H), 6.78 (dd, *J* = 9.7, 3.2 Hz, 1H), 6.28 (dd, *J* = 9.7, 2.7 Hz, 1H), 3.41 (s, 2H), 2.49 (dt, *J* = 12.7, 3.3 Hz, 1H), 2.37 (t, *J* = 3.0 Hz, 1H), 2.19 (dd, *J* = 13.0, 4.0 Hz, 1H), 2.10 – 2.00 (m, 1H), 1.94 (td, *J* = 13.5, 13.1, 3.6 Hz, 1H), 1.43 (s, 3H), 1.02 (s, 3H).

$^{13}\text{C-NMR}$  (101 MHz,  $\text{CD}_3\text{OD}$ ):  $\delta$  = 208.0, 140.0, 138.0, 138.0, 130.8, 130.3, 125.7, 125.1, 123.4, 122.9, 120.0, 119.5, 114.1, 110.6, 108.9, 52.0, 51.1, 37.8, 34.7, 28.8, 20.8, 19.0.

**IR** (neat):  $\nu$  = 3294, 2937, 2825, 1717, 1242, 1023, 716  $\text{cm}^{-1}$ .

**HRMS** (ESI, *m/z*):  $[\text{M-H}]^-$  calcd. for  $\text{C}_{23}\text{H}_{22}\text{NO}_2$ , 344.1656; found 344.1654.

$R_f$  = 0.20 (Hexane:EtOAc = 2:1), UV-active, blue spot (CAM).

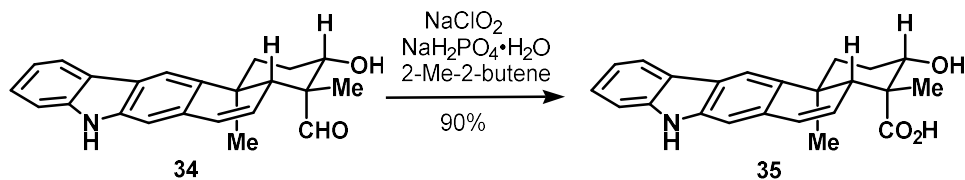

**(3S,4R,4aR,13bS)-3-hydroxy-4,13b-dimethyl-2,3,4,4a,8,13b-hexahydro-1H-naphtho[2,1-b]carbazole-4-carboxylic acid (34)**: To a solution of the aldehyde **34** (20 mg, 0.058 mmol, 1.0 equiv) in acetone (900  $\mu\text{L}$ ),  $\text{H}_2\text{O}$  (450  $\mu\text{L}$ ), and 2-Me-2-butene (152  $\mu\text{L}$ , 3.16 mmol, 25.0 equiv) was added a mixture of  $\text{NaClO}_2$  (36.5 mg, 0.406 mmol, 7.00 equiv, ~90% techn.) and  $\text{NaH}_2\text{PO}_4 \cdot \text{H}_2\text{O}$  (80.0 mg, 0.578 mmol, 10.0 equiv) at 0  $^\circ\text{C}$ . The mixture was warmed to room temperature and stirred for 2 h before being quenched by the addition of sat. aq.  $\text{NaCl}$  and sat. aq.  $\text{NH}_4\text{Cl}$  (ca. 1:1). The mixture was transferred into a sep. funnel and solid  $\text{NaCl}$  was added. The aq. layer was then extracted six times with EtOAc and dried over  $\text{MgSO}_4$ . After concentrating the solution *in vacuo*, the crude material was purified by gradient flash chromatography (Yamazen, eluting with 0-10% MeOH in DCM) to afford 18.8 mg (90%) of acid **35** as a yellow foam.

$[\alpha]_D^{22}$  –123.1 (*c* = 1.00, MeOH)

**<sup>1</sup>H-NMR** (400 MHz, CD<sub>3</sub>OD): δ = 8.00 (d, *J* = 7.8 Hz, 1H), 7.80 (s, 1H), 7.40 (d, *J* = 8.1 Hz, 1H), 7.33 (ddd, *J* = 8.1, 7.0, 1.2 Hz, 1H), 7.14 (ddd, *J* = 8.1, 7.0, 1.1 Hz, 1H), 7.09 (s, 1H), 6.60 (d, *J* = 9.9 Hz, 1H), 6.46 (d, *J* = 9.9 Hz, 1H), 3.26 (dd, *J* = 12.1, 4.3 Hz, 1H), 2.38 (dt, *J* = 13.0, 3.6 Hz, 1H), 2.28 – 2.17 (m, 2H), 1.92 (dt, *J* = 12.8, 3.8 Hz, 1H), 1.80 – 1.70 (m, 1H), 1.49 (s, 3H), 1.24-1.28 (m, 1H), 1.04 (s, 3H).

**<sup>13</sup>C NMR** (101 MHz, CD<sub>3</sub>OD): δ = 180.5, 141.9, 140.0, 139.1, 132.2, 129.8, 128.2, 126.2, 124.7, 123.6, 120.6, 119.6, 114.9, 111.6, 109.4, 78.9, 52.7, 39.3, 36.3, 29.8, 24.1, 21.2.

**IR** (neat): ν = 3403, 2982, 2970, 1736, 1478, 1372, 1244, 1042 cm<sup>-1</sup>.

**HRMS** (ESI, *m/z*): [M-H]<sup>-</sup> calcd. for C<sub>23</sub>H<sub>22</sub>NO<sub>3</sub>, 360.1605; found 360.1601.

**R<sub>f</sub>** = 0.25 (7% MeOH in DCM), UV-active, blue spot (CAM).

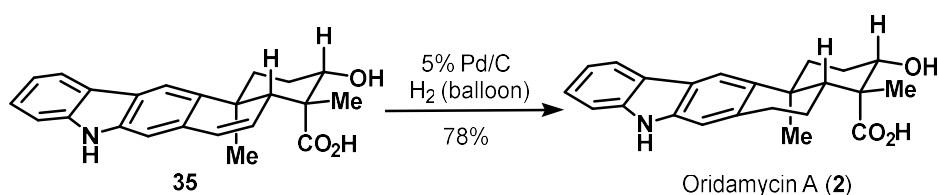

**Oridamycin A (2):** Hydrogen from a balloon was bubbled through a mixture of crude carbazole **35** and 5% Pd/C (32.7 mg, 0.308 mmol, 2.00 equiv) in MeOH (0.900 mL) for 1 min. The mixture was then vigorously stirred under an atmosphere of hydrogen (balloon) for 3.5 h at room temperature. After filtering the mixture through celite (EtOAc/MeOH eluent), the solution was concentrated *in vacuo* and the crude material was purified by preparative thin layer chromatography (10% MeOH in DCM) to afford 10.7 mg (20%, 3 steps) of oridamycin A (**2**) as a pale yellow solid.

[α]<sub>D</sub><sup>22</sup> +100.3 (c = 0.4, MeOH) lit<sup>6</sup>: [α]<sub>D</sub><sup>30</sup> +93.3 (c = 0.2, MeOH)

**<sup>1</sup>H-NMR** (700 MHz, CD<sub>3</sub>OD) δ = 7.96 (d, *J* = 8.0 Hz, 1H), 7.96 (s, 1H), 7.34 (d, *J* = 8.0 Hz, 1H), 7.28 (t, *J* = 7.6 Hz, 1H), 7.08 (d, *J* = 7.6 Hz, 1H), 7.07 (s, 1H), 3.26 (d, *J* = 11.5 Hz, 1H), 3.10 (dd, *J* = 16.2, 4.6 Hz, 1H), 2.98 (ddd, *J* = 16.2, 4.6 Hz, 1H), 2.60 (dd, *J* = 13.2, 2.0 Hz, 1H), 2.34 (d, *J* = 13.2 Hz, 1H), 2.25 (dd, *J* = 13.9, 6.0 Hz, 1H), 2.20-2.15 (m, 1H), 1.98-1.92 (m, 1H), 1.65-1.60 (m, 1H), 1.54 (m, 1H), 1.51 (s, 3H), 1.29 (s, 3H) ppm.



**<sup>13</sup>C NMR** (176 MHz, CD<sub>3</sub>OD): δ = 181.0, 142.0, 140.3, 140.1, 134.5, 126.1, 124.6, 123.2, 120.6, 119.3, 117.5, 111.4, 110.7, 79.0, 54.0, 49.9, 39.9, 39.6, 34.0, 30.2, 24.8, 24.5, 22.5.

**IR** (neat): ν = 3412, 2980, 1695, 1465, 1259, 1089 cm<sup>-1</sup>.

**HRMS** (ESI, *m/z*): [M-H]<sup>-</sup> calcd. for C<sub>23</sub>H<sub>24</sub>NO<sub>3</sub>, 362.1762; found 362.1756.

**R<sub>f</sub>** = 0.25 (7% MeOH in DCM), UV-active, blue spot (CAM).

**M.p.** = 183 °C lit.<sup>6</sup> **M.p.** = 180 °C.

### Chemical Shifts of <sup>1</sup>H-NMR for Natural and Synthetic Xiamycin A (1)

| <b>Sarpong<br/>(700 MHz, CD<sub>3</sub>OD)</b> | <b>Natural<sup>[3]</sup><br/>(500 MHz, CD<sub>3</sub>OD)</b> | <b>Ang Li<sup>[2]</sup><br/>(400 MHz, CD<sub>3</sub>OD)</b> |
|------------------------------------------------|--------------------------------------------------------------|-------------------------------------------------------------|
| 7.97 (d, <i>J</i> = 8.0 Hz, 1H)                | 7.96 (d, <i>J</i> = 8.0 Hz, 1H)                              | 7.97 (d, <i>J</i> = 8.0 Hz, 1H)                             |
| 7.94 (s, 1H)                                   | 7.91 (s, 1H)                                                 | 7.93 (s, 1H)                                                |
| 7.35 (d, <i>J</i> = 8.0 Hz, 1H)                | 7.35 (d, <i>J</i> = 8.0 Hz, 1H)                              | 7.35 (d, <i>J</i> = 8.0 Hz, 1H)                             |
| 7.29 (t, <i>J</i> = 7.9 Hz, 1H)                | 7.28 (dt, <i>J</i> = 7.0, 1.0 Hz, 1H)                        | 7.29 (t, <i>J</i> = 7.2 Hz, 1H)                             |
| 7.09 (t, <i>J</i> = 7.5 Hz, 1H)                | 7.08 (dt, <i>J</i> = 7.0, 1.0 Hz, 1H)                        | 7.09 (d, <i>J</i> = 7.2 Hz, 1H)                             |
| 7.07 (s, 1H)                                   | 7.07 (s, 1H)                                                 | 7.06 (s, 1H)                                                |
| 4.10 (dd, <i>J</i> = 10.5, 7.5 Hz, 1H)         | 4.09 (dd, <i>J</i> = 10.5, 7.5 Hz, 1H)                       | 4.10 (dd, <i>J</i> = 10.4, 7.3 Hz, 1H)                      |
| 3.15-3.08 (m, 1H)<br>3.08-2.99 (m, 1H)         | 3.09 (m, 2H)                                                 | 3.15-3.01 (m, 1H)<br>3.11-2.96 (m, 1H)                      |
| 2.64 (d, <i>J</i> = 12.8 Hz, 1H)               | 2.58 (dt, <i>J</i> = 13.1, 1.5 Hz, 1H)                       | 2.62 (dd, <i>J</i> = 13.2, 3.0, 1H)                         |
| 2.14 (d, <i>J</i> = 11.8 Hz, 1H)               | 2.18 (dd, <i>J</i> = 12.6, 2.3 Hz, 1H)                       | 2.16 (dd, <i>J</i> = 12.4, 1.8 Hz, 1H)                      |
| 2.08-1.98 (m, 1H)                              | 2.00 (qd, <i>J</i> = 12.6, 7.3 Hz, 1H)                       | 2.08-1.95 (m, 1H)                                           |
| 1.93-1.88 (m, 2H)                              | 1.90 (m, 1H)<br>1.86 (qd, <i>J</i> = 13.1, 2.9 Hz, 1H)       | 1.93-1.89 (m, 1H)<br>1.89-1.85 (m, 1H)                      |
| 1.78-1.72 (m, 1H)                              | 1.76 (dt, <i>J</i> = 12.3, 6.7 Hz, 1H)                       | 1.78-1.70 (m, 1H)                                           |
| 1.58-1.53 (m, 1H)                              | 1.56 (m, 1H)                                                 | 1.54 (dd, <i>J</i> = 13.0, 7.2 Hz, 1H)                      |
| 1.30 (s, 3H)                                   | 1.28 (s, 3H)                                                 | 1.29 (s, 3H)                                                |
| 1.25 (s, 3H)                                   | 1.23 (s, 3H)                                                 | 1.24 (s, 3H)                                                |

### Chemical Shifts of $^{13}\text{C}$ -NMR for Natural and Synthetic Xiamycin A (1)

| Sarpong<br>(176 MHz, $\text{CD}_3\text{OD}$ ) | Natural <sup>[3]</sup><br>(151 MHz, $\text{CD}_3\text{OD}$ ) | Ang Li <sup>[2]</sup><br>(101 MHz, $\text{CD}_3\text{OD}$ ) |
|-----------------------------------------------|--------------------------------------------------------------|-------------------------------------------------------------|
| 181.3                                         | 181.3                                                        | 181.2                                                       |
| 142.0                                         | 142.0                                                        | 142.0                                                       |
| 141.8                                         | 141.8                                                        | 141.8                                                       |
| 140.1                                         | 140.1                                                        | 140.1                                                       |
| 134.0                                         | 134.0                                                        | 134.0                                                       |
| 126.0                                         | 126.0                                                        | 126.0                                                       |
| 124.6                                         | 124.7                                                        | 124.7                                                       |
| 123.1                                         | 123.1                                                        | 123.1                                                       |
| 120.6                                         | 120.5                                                        | 120.6                                                       |
| 119.3                                         | 119.3                                                        | 119.3                                                       |
| 116.4                                         | 116.3                                                        | 116.3                                                       |
| 111.4                                         | 111.5                                                        | 111.4                                                       |
| 110.8                                         | 110.8                                                        | 110.8                                                       |
| 76.3                                          | 76.3                                                         | 76.3                                                        |
| 54.9                                          | 54.9                                                         | 54.9                                                        |
| 47.9                                          | 47.9                                                         | 47.9                                                        |
| 39.0                                          | 39.0                                                         | 39.0                                                        |
| 38.3                                          | 38.3                                                         | 38.3                                                        |
| 32.1                                          | 32.0                                                         | 32.0                                                        |
| 28.7                                          | 28.6                                                         | 28.6                                                        |
| 26.3                                          | 26.3                                                         | 26.3                                                        |
| 22.6                                          | 22.6                                                         | 22.6                                                        |
| 11.4                                          | 11.4                                                         | 11.4                                                        |

### Chemical Shifts of <sup>1</sup>H-NMR for Natural and Synthetic Xiamycin C (3)

| <b>Sarpong<br/>(600 MHz, CD<sub>3</sub>OD)</b> | <b>Natural<sup>[4]</sup><br/>(500 MHz, CD<sub>3</sub>OD)</b> |
|------------------------------------------------|--------------------------------------------------------------|
| 8.00 (d, <i>J</i> = 7.7 Hz, 1H)                | 8.00 (d, <i>J</i> = 8.0 Hz, 1H)                              |
| 7.94 (s, 1H)                                   | 7.94 (s, 1H)                                                 |
| 7.58 (s, 1H)                                   | 7.58 (s, 1H)                                                 |
| 7.37 (d, <i>J</i> = 8.0 Hz, 1H)                | 7.38 (d, <i>J</i> = 8.0 Hz, 1H)                              |
| 7.31 (dd, <i>J</i> = 7.9, 8.0 Hz, 1H)          | 7.31 (dd, <i>J</i> = 8.0, 8.0 Hz, 1H)                        |
| 7.10 (d, <i>J</i> = 7.9, 8.0 Hz 1H)            | 7.10 (dd, <i>J</i> = 8.0, 8.0 Hz, 1H)                        |
| 4.89 (m, 1H)                                   | 4.91 (dd, <i>J</i> = 10.0, 7.5 Hz, 1H)                       |
| 4.09 (dd, <i>J</i> = 8.0, 6.6 Hz, 1H)          | 4.08 (dd, <i>J</i> = 8.0, 6.5 Hz, 1H)                        |
| 2.63 (ddd, <i>J</i> = 13.2, 3.4, 3.2, Hz, 1H)  | 2.62 (ddd, <i>J</i> = 13.0, 3.5, 3.5 Hz, 1H)                 |
| 2.19 (d, <i>J</i> = 12.6 Hz, 1H)               | 2.20 (dd, <i>J</i> = 12.0, 2.0 Hz, 1H)                       |
| 2.09 – 1.95 (m, 2H)                            | 1.97 (m, 2H)                                                 |
| 1.93 – 1.82 (m, 3H)                            | 1.93 (m, 1H)                                                 |
|                                                | 1.89 (m, 2H)                                                 |
| 1.75 – 1.65 (m, 1H)                            | 1.70 (m, 1H)                                                 |
| 1.38 (s, 3H)                                   | 1.38 (s, 3H)                                                 |
| 1.26 (s, 3H)                                   | 1.26 (s, 3H)                                                 |

### Chemical Shifts of <sup>13</sup>C-NMR for Natural and Synthetic Xiamycin C (3)

| <b>Sarpong<br/>(176 MHz, CD<sub>3</sub>OD)</b> | <b>Natural<sup>[4]</sup><br/>(125 MHz, CD<sub>3</sub>OD)</b> |
|------------------------------------------------|--------------------------------------------------------------|
| 180.4                                          | 182.0                                                        |
| 142.3                                          | 142.4                                                        |
| 142.1                                          | 141.7                                                        |
| 140.1                                          | 140.2                                                        |
| 137.9                                          | 137.6                                                        |
| 126.3                                          | 126.4                                                        |
| 124.5                                          | 124.4                                                        |
| 124.0                                          | 124.1                                                        |
| 120.8                                          | 120.8                                                        |
| 119.3                                          | 119.4                                                        |
| 116.3                                          | 116.3                                                        |

|       |       |
|-------|-------|
| 111.5 | 111.6 |
| 110.1 | 110.1 |
| 76.8  | 76.3  |
| 72.3  | 72.2  |
| 55.1  | 54.8  |
| 46.0  | 46.1  |
| 39.2  | 39.2  |
| 39.0  | 39.0  |
| 33.3  | 33.2  |
| 28.4  | 28.5  |
| 26.9  | 26.8  |
| 12.7  | 11.9  |

#### Chemical Shifts of <sup>1</sup>H-NMR for Natural and Synthetic Xiamycin F (4)

| <b>Sarpong<br/>(700 MHz, CD<sub>3</sub>OD)</b> | <b>Natural<sup>[5]</sup><br/>(500 MHz, CD<sub>3</sub>OD)</b> |
|------------------------------------------------|--------------------------------------------------------------|
| 8.16–8.13 (d, <i>J</i> = 7.6 Hz, 1H)           | 8.16 (d, <i>J</i> = 8.0 Hz, 1H)                              |
| 8.12 (s, 1H)                                   | 8.12 (s, 1H)                                                 |
| 8.05 (s, 1H)                                   | 8.06 (s, 1H)                                                 |
| 7.47–7.42 (m, 2H)                              | 7.47 (m, 1H)<br>7.47 (m, 1H)                                 |
| 7.19 (td, <i>J</i> = 6.8, 2.0 Hz, 1H)          | 7.20 (m, 1H)                                                 |
| 4.13–4.06 (m, 1H)                              | 4.13 (m, 1H)                                                 |
| 2.91 (t, <i>J</i> = 15.9 Hz, 1H)               | 2.96 (m, 1H)                                                 |
| 2.72–2.64 (m, 2H)                              | 2.73 (m, 2H)<br>2.67 (m, 1H)                                 |
| 2.57 (d, <i>J</i> = 11.8 Hz, 1H)               | 2.43 (d, <i>J</i> = 17.5 Hz, 1H)                             |
| 1.98–1.90 (m, 3H)                              | 1.96 (m, 2H)<br>1.94 (m, 1H)                                 |
| 1.35 (s, 3H)                                   | 1.39 (s, 3H)                                                 |
| 1.30 (s, 3H)                                   | 1.33 (s, 3H)                                                 |

### Chemical Shifts of $^{13}\text{C}$ -NMR for Natural and Synthetic Xiamycin F (4)

| <b>Sarpong<br/>(176 MHz, CD<sub>3</sub>OD)</b> | <b>Natural<sup>[5]</sup><br/>(150 MHz, CD<sub>3</sub>OD)</b> |
|------------------------------------------------|--------------------------------------------------------------|
| 201.1                                          | 201.3                                                        |
| 180.1                                          | 180.0                                                        |
| 147.7                                          | 147.5                                                        |
| 144.0                                          | 143.9                                                        |
| 139.6                                          | 139.6                                                        |
| 130.1                                          | 130.2                                                        |
| 129.4                                          | 129.5                                                        |
| 128.8                                          | 128.6                                                        |
| 123.8                                          | 123.8                                                        |
| 122.3                                          | 122.2                                                        |
| 120.4                                          | 120.3                                                        |
| 116.2                                          | 116.1                                                        |
| 112.3                                          | 112.2                                                        |
| 110.7                                          | 110.7                                                        |
| 76.0                                           | 76.8                                                         |
| 54.3                                           | 54.3                                                         |
| 46.9                                           | 46.8                                                         |
| 38.8                                           | 38.7                                                         |
| 38.7                                           | 38.2                                                         |
| 38.3                                           | 38.2                                                         |
| 28.4                                           | 28.3                                                         |
| 24.9                                           | 24.8                                                         |
| 11.2                                           | 11.2                                                         |

### Chemical Shifts of <sup>1</sup>H-NMR for Natural and Synthetic Xiamycin H (5)

| Sarpong<br>(700 MHz, CD <sub>3</sub> OD) | Natural <sup>[5]</sup><br>(500 MHz, CD <sub>3</sub> OD) |
|------------------------------------------|---------------------------------------------------------|
| 8.16 (s)                                 | 8.16 (s)                                                |
| 8.06 (d, <i>J</i> = 7.9 Hz, 1H)          | 8.07 (d, <i>J</i> = 8.0 Hz, 1H)                         |
| 7.42 (d, <i>J</i> = 8.1 Hz, 1H)          | 7.43 (d, <i>J</i> = 7.8 Hz, 1H)                         |
| 7.36 (t, <i>J</i> = 7.5 Hz, 1H)          | 7.36 (ddd, <i>J</i> = 8.4, 7.2, 1.2 Hz, 1H)             |
| 7.35 (s, 1H)                             | 7.35 (s, 1H)                                            |
| 7.15 (t, <i>J</i> = 7.5 Hz, 1H)          | 7.15 (ddd, <i>J</i> = 8.4, 7.2, 1.2 Hz, 1H)             |
| 7.05 (d, <i>J</i> = 9.8 Hz, 1H)          | 7.05 (d, <i>J</i> = 9.6 Hz, 1H)                         |
| 6.76 (d, <i>J</i> = 9.8 Hz, 1H)          | 6.76 (d, <i>J</i> = 9.6 Hz, 1H)                         |
| 2.98 (m, 1H)                             | 2.98 (m, 1H)                                            |
| 2.85 (m, 1H)                             | 2.85 (m, 1H)                                            |
| 2.66 (m, 1H)                             | 2.67 (m, 1H)                                            |
| 2.35 (m, 1H)                             | 2.35 (m, 1H)                                            |
| 1.92 (s, 3H)                             | 1.92 (s, 3H)                                            |
| 1.49 (s, 3H)                             | 1.49 (s, 3H)                                            |

### Chemical Shifts of <sup>13</sup>C-NMR for Natural and Synthetic Xiamycin H (5)

| Sarpong<br>(176 MHz, CD <sub>3</sub> OD) | Natural <sup>[5]</sup><br>(151 MHz, CD <sub>3</sub> OD) |
|------------------------------------------|---------------------------------------------------------|
| 200.5                                    | 200.7                                                   |
| 160.2                                    | 160.2                                                   |
| 156.3                                    | 142.6                                                   |
| 140.1                                    | 139.5                                                   |
| 137.8                                    | 138.0                                                   |
| 136.6                                    | 136.7                                                   |
| 130.1                                    | 130.3                                                   |
| 129.4                                    | 129.4                                                   |
| 127.0                                    | 127.2                                                   |
| 125.1                                    | 125.8                                                   |
| 124.3                                    | 124.4                                                   |
| 123.4                                    | 123.6                                                   |
| 121.1                                    | 121.2                                                   |

|       |       |
|-------|-------|
| 120.2 | 120.2 |
| 116.5 | 116.7 |
| 111.8 | 112.0 |
| 111.8 | 112.0 |
| 40.6  | 40.7  |
| 35.1  | 35.2  |
| 34.9  | 35.0  |
| 31.3  | 31.4  |
| 10.6  | 10.7  |

### Chemical Shifts of <sup>1</sup>H-NMR for Natural and Synthetic Oridamycin A (2)

| <b>Sarpong<br/>(700 MHz, CD<sub>3</sub>OD)</b> | <b>Natural<sup>[7]</sup><br/>(600 MHz, CD<sub>3</sub>OD)</b> | <b>Ang Li<sup>[2]</sup><br/>(400 MHz, CD<sub>3</sub>OD)</b> |
|------------------------------------------------|--------------------------------------------------------------|-------------------------------------------------------------|
| 7.96 (d, <i>J</i> = 8.0 Hz, 1H)                | 7.93 (d, <i>J</i> = 8.0 Hz, 1H)                              | 7.96 (d, <i>J</i> = 8.0 Hz, 1H)                             |
| 7.96 (s, 1H)                                   | 7.93 (s, 1H)                                                 | 7.95 (s, 1H)                                                |
| 7.34 (d, <i>J</i> = 8.0 Hz, 1H)                | 7.32 (d, <i>J</i> = 8.0 Hz, 1H)                              | 7.34 (d, <i>J</i> = 8.0 Hz, 1H)                             |
| 7.28 (t, <i>J</i> = 7.6 Hz, 1H)                | 7.25 (dt, <i>J</i> = 8.1, 1.4 Hz, 1H)                        | 7.28 (t, <i>J</i> = 7.6 Hz, 1H)                             |
| 7.08 (d, <i>J</i> = 7.6 Hz, 1H)                | 7.05 (dt, <i>J</i> = 8.1, 1.4 Hz, 1H)                        | 7.08 (d, <i>J</i> = 7.6 Hz, 1H)                             |
| 7.07 (s, 1H)                                   | 7.03 (s, 1H)                                                 | 7.05 (s, 1H)                                                |
| 3.26 (d, <i>J</i> = 11.5 Hz, 1H)               | 3.22 (dd, <i>J</i> = 12.2, 4.6 Hz, 1H)                       | 3.24 (dd, <i>J</i> = 12.1, 4.3 Hz, 1H)                      |
| 3.10 (dd, <i>J</i> = 16.2, 4.6 Hz, 1H)         | 3.06 (ddd, <i>J</i> = 16.3, 5.4, 2.3, 1H)                    | 3.08 (dd, <i>J</i> = 16.5, 4.0, 1H)                         |
| 2.98 (dd, <i>J</i> = 16.5, 4.6 Hz, 1H)         | 2.94 (ddd, <i>J</i> = 16.3, 5.4, 2.3, 1H)                    | 3.01-2.89 (m, 1H)                                           |
| 2.60 (dd, <i>J</i> = 13.2, 2.0 Hz, 1H)         | 2.57 (dt, <i>J</i> = 13.6, 3.6 Hz, 1H)                       | 2.59 (dd, <i>J</i> = 13.2, 2.0, 1H)                         |
| 2.38-2.31 (m, 1H)                              | 2.30 (dq, <i>J</i> = 12.6, 2.3 Hz, 1H)                       | 2.38-2.26 (m, 1H)                                           |
| 2.25 (dd, <i>J</i> = 13.9, 6.0 Hz, 1H)         | 2.23 (m, 1H)                                                 | 2.25-2.19 (m, 1H)                                           |
| 2.20-2.15 (m, 1H)                              | 2.09 (dt, <i>J</i> = 12.7, 5.4, 1H)                          | 2.19-2.06 (m, 1H)                                           |
| 1.98-1.92 (m, 1H)                              | 1.90 (qd, <i>J</i> = 13.6, 3.6 Hz, 1H)                       | 1.97-1.89 (m, 1H)                                           |
| 1.65-1.60 (m, 1H)                              | 1.58 (dt, <i>J</i> = 13.6, 4.1 Hz, 1H)                       | 1.59 (ddd, <i>J</i> = 13.6, 13.6, 3.5 1H)                   |
| 1.57-1.45 (m, 4H)                              | 1.56 (m, 1H)<br>1.48 (s, 3H)                                 | 1.54 (dd, <i>J</i> = 13.0, 7.2 Hz, 1H)<br>1.49 (s, 3H)      |
| 1.29 (s, 3H)                                   | 1.26 (s, 3H)                                                 | 1.27 (s, 3H)                                                |

### Chemical Shifts of <sup>13</sup>C-NMR for Natural and Synthetic Oridamycin A (2)



| <b>Sarpong<br/>(176 MHz, CD<sub>3</sub>OD)</b> | <b>Natural<sup>[7]</sup><br/>(151 MHz, CD<sub>3</sub>OD)</b> | <b>Ang Li<sup>[2]</sup><br/>(101 MHz, CD<sub>3</sub>OD)</b> |
|------------------------------------------------|--------------------------------------------------------------|-------------------------------------------------------------|
| 181.0                                          | 181.0                                                        | 181.0                                                       |
| 142.0                                          | 142.0                                                        | 142.1                                                       |
| 140.3                                          | 140.3                                                        | 140.4                                                       |
| 140.1                                          | 140.1                                                        | 140.1                                                       |
| 134.5                                          | 134.5                                                        | 134.5                                                       |
| 126.0                                          | 126.1                                                        | 126.1                                                       |
| 124.6                                          | 124.6                                                        | 124.6                                                       |
| 123.2                                          | 123.2                                                        | 123.3                                                       |
| 120.6                                          | 120.6                                                        | 120.6                                                       |
| 119.3                                          | 119.3                                                        | 119.4                                                       |
| 117.5                                          | 117.5                                                        | 117.5                                                       |
| 111.4                                          | 111.4                                                        | 111.4                                                       |
| 110.7                                          | 110.7                                                        | 110.7                                                       |
| 79.0                                           | 79.1                                                         | 79.1                                                        |
| 54.0                                           | 54.1                                                         | 54.1                                                        |
| 49.8                                           | 49.8                                                         | 49.8                                                        |
| 39.9                                           | 40.0                                                         | 40.0                                                        |
| 39.6                                           | 39.6                                                         | 39.6                                                        |
| 34.0                                           | 34.0                                                         | 34.0                                                        |
| 30.2                                           | 30.3                                                         | 30.3                                                        |
| 24.8                                           | 24.8                                                         | 24.8                                                        |
| 24.5                                           | 24.6                                                         | 24.6                                                        |
| 22.5                                           | 22.5                                                         | 22.5                                                        |

### Chemical Shifts of <sup>1</sup>H-NMR for Omura/Nagamitsu and Sarpong's *trans*-diol

| Sarpong<br>(600 MHz, CDCl <sub>3</sub> )                                   | Omura/Nagamitsu <sup>[1]</sup><br>(400 MHz, CDCl <sub>3</sub> ) |
|----------------------------------------------------------------------------|-----------------------------------------------------------------|
| 6.64 (d, <i>J</i> = 4.8 Hz, 1H)                                            | 6.82–6.79 (m, 1H)                                               |
| 3.68-3.58 (m, 2H)                                                          | 3.62–3.58 (m, 1H)                                               |
| 3.39 (d, <i>J</i> = 10.6 Hz, 1H)                                           | 3.53 (d, <i>J</i> =11.2 Hz, 1H)                                 |
| 3.04 (br s, 2H)                                                            | 3.27 (d, <i>J</i> =11.2 Hz, 1H)                                 |
| 2.39-2.29 (m, 1H)                                                          | 2.43–2.27 (m, 2H)                                               |
| 2.18 (d, <i>J</i> = 19.1 Hz, 1H)                                           | 2.01 (dd, <i>J</i> =10.9, 4.8 Hz, 1H)                           |
| 1.91 (d, <i>J</i> = 14.3 Hz, 1H)                                           | 1.86 (dt, <i>J</i> =13.9, 3.4 Hz, 1H)                           |
| 1.79 (dd, <i>J</i> = 11.5, 4.2 Hz, 1H),<br>1.75 (d, <i>J</i> = 4.0 Hz, 1H) | 1.76–1.68 (m, 2H)                                               |
| 1.72 (s, 3H)                                                               | 1.72–1.70 (m, 3H)                                               |
| 1.70-1.60 (m, 1H)                                                          |                                                                 |
| 1.47 (td, <i>J</i> = 13.9, 3.3 Hz, 1H)                                     | 1.47–1.39 (m, 1H)                                               |
| 1.06 (s, 3H)                                                               | 1.07 (s, 3H)                                                    |
| 0.99 (s, 3H)                                                               | 0.85 (s, 3H)                                                    |

### Chemical Shifts of <sup>13</sup>C-NMR for for Nagamitsu and Sarpong *trans*-diol

| Sarpong<br>(156 MHz, CDCl <sub>3</sub> ) | Omura/Nagamitsu <sup>[1]</sup><br>(101 MHz, CDCl <sub>3</sub> ) |
|------------------------------------------|-----------------------------------------------------------------|
| 205.4                                    | 207.7                                                           |
| 143.4                                    | 146.3                                                           |
| 133.2                                    | 133.7                                                           |
| 75.4                                     | 72.5                                                            |
| 69.6                                     | 65.5                                                            |
| 44.4                                     | 45.5                                                            |
| 42.9                                     | 44.0                                                            |
| 42.5                                     | 42.6                                                            |
| 31.4                                     | 32.7                                                            |
| 26.6                                     | 27.2                                                            |

|      |      |
|------|------|
| 24.1 | 24.9 |
| 17.9 | 18.2 |
| 16.4 | 16.4 |
| 11.9 | 12.9 |

## 2. Fungitoxicity assessment

The technical materials were evaluated for antifungal activity against three plant pathogens *Ustilago maydis*, *Zymoseptoria tritici* and *Magnaporthe oryzae* in 96-well microtitre plate-based growth inhibition assays. Test materials were prepared as 1 mg/ml stock solutions in DMSO and a five-fold dilution series was prepared. 2 µl of the diluted compounds were added to two replicate wells to deliver a final test concentration of 10 ppm once inoculated. Wells then received 200 µl of cells in minimal growth media containing 20 g glucose, 3 g K<sub>2</sub>HPO<sub>4</sub>, 3 g KH<sub>2</sub>PO<sub>4</sub> and 6.7 g yeast nitrogen base without amino acids (BD Difco, BD291920) per liter. *Z. tritici* spores were collected from a 3-day old yeast malt agar plate that is maintained at 18°C under black light for 12 hours and dark for 12 hours. *M. oryzae* spores were collected from 12 to 18-day old potato dextrose agar plates supplemented with 16 g per liter rice flour and maintained at 22°C under 12 hours white fluorescent light and 12 hours dark. *U. maydis* spores were taken from a 24-hour shake flask culture in potato dextrose broth maintained at 24°C and 120 rpm. Final cell densities were 1 X 10<sup>5</sup> cells ml<sup>-1</sup> (*Z. tritici*), 4 X 10<sup>4</sup> cells ml<sup>-1</sup> (*M. oryzae*) and 5 X 10<sup>4</sup> cells ml<sup>-1</sup> (*U. maydis*). Test plates were incubated in the dark for 48 hr (*U. maydis*) or 72 hr (*M. oryzae* and *Z. tritici*) at 22°C (*M. oryzae* and *Z. tritici*) or 24°C (*U. maydis*), and initial and final cell density readings determined using a NepheloStar nephelometer (BMG LABTECH Gmb, D-77799 Ortenberg, Germany). Percentage growth inhibition was calculated by reference to control wells containing only growth media, amended with 2 µl DMSO, and inoculum.

## Summary of bioactivity

| Compound                      | Wheat leaf blotch % Growth Inhibition (10 ppm) | Rice blast % Growth Inhibition (10 ppm) | Corn smut % Growth Inhibition (10 ppm) |
|-------------------------------|------------------------------------------------|-----------------------------------------|----------------------------------------|
| Xiamycin H ( <b>5</b> )       | 100                                            | 50                                      | 40                                     |
| <b>25</b>                     | 40                                             | 0                                       | 30                                     |
| 19Epi-Xiamycin C ( <b>3</b> ) | 20                                             | 10                                      | 10                                     |
| <b>8a</b>                     | 20                                             | 0                                       | 30                                     |
| <b>20</b>                     | 10                                             | 10                                      | 0                                      |
| <b>21</b>                     | 10                                             | 0                                       | 30                                     |
| <b>7</b>                      | 10                                             | 10                                      | 50                                     |
| <b>15</b> major               | 5                                              | 35                                      | 15                                     |
| <b>8b</b>                     | 5                                              | 5                                       | 0                                      |
| Xiamycin F ( <b>4</b> )       | 0                                              | 10                                      | 10                                     |
| Xiamycin C ( <b>3</b> )       | 0                                              | 10                                      | 10                                     |
| Min triene diol               | 0                                              | 30                                      | 0                                      |
| <b>16</b>                     | 0                                              | 30                                      | 0                                      |
| Xiamycin A ( <b>1</b> )       | 0                                              | 15                                      | 5                                      |
| <b>27</b>                     | 0                                              | 5                                       | 5                                      |
| <b>13</b>                     | 0                                              | 30                                      | 20                                     |
| <b>23</b>                     | 0                                              | 50                                      | 0                                      |

## 3. References

- [1] A. Odani, K. Ishihara, M. Ohtawa, H. Tomoda, S. Omura, T. Nagamitsu, *Tetrahedron* **2011**, *67*, 8195.
- [2] Z. Meng, H. Yu, L. Li, W. Tao, H. Chen, M. Wan, P. Yang, D. J. Edmonds, J. Zhong, A. Li, *Nature Commun.* **2015**, *6*, 1.
- [3] L. Ding, J. Munch, H. Goerls, A. Maier, H. Fiebig, W. Lin, C. Hertweck, *Bioorg. Med. Chem. Lett.* **2010**, *15*, 6685.
- [4] S. Kim, T. Ha, W. K. Oh, J. Shin, D. Oh, *J. Nat. Prod.* **2016**, *79*, 51.
- [5] Q. Zhang, H. Li, L. Yu, Y. Sun, Y. Zhu, H. Zhu, L. Zhang, S. Li, Y. Shen, C. Tian, A. Li, H. Liu, C. Zhang, *Chem. Sci.* **2017**, *8*, 5067.
- [6] J. Feng, F. Noack, M. Krische, *J. Am. Chem. Soc.* **2016**, *138*, 12364.
- [7] K. Takada, H. Kajiwarra, N. Immamura, *J. Nat. Prod.* **2010**, *73*, 698.

## 4. UV Absorption

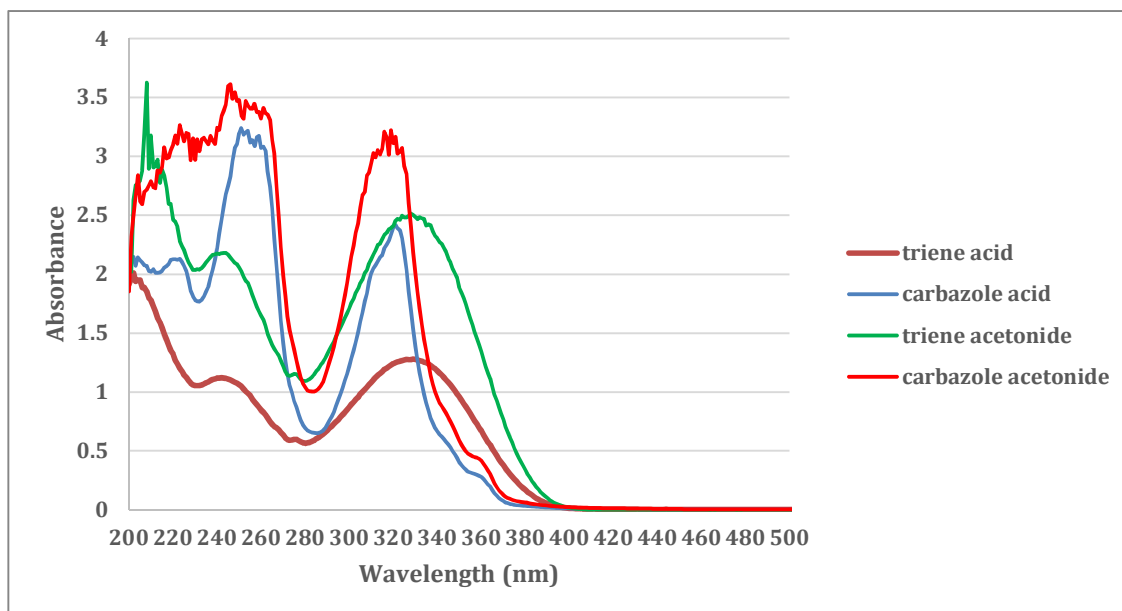

## 5. Crystallographic Data

**Table 1. Crystal data and structure refinement for mp001 (CCDC 1831586)**

|                        |                                                |          |
|------------------------|------------------------------------------------|----------|
| Identification code    | mp001                                          |          |
| Empirical formula      | C <sub>14</sub> H <sub>22</sub> O <sub>3</sub> |          |
| Formula weight         | 238.31                                         |          |
| Temperature            | 100(2) K                                       |          |
| Wavelength             | 1.54178 Å                                      |          |
| Crystal system         | Orthorhombic                                   |          |
| Space group            | P 21 21 21                                     |          |
| Unit cell dimensions   | a = 7.2602(5) Å                                | α = 90°. |
|                        | b = 8.3489(6) Å                                | β = 90°. |
|                        | c = 20.4643(15) Å                              | γ = 90°. |
| Volume                 | 1240.44(15) Å <sup>3</sup>                     |          |
| Z                      | 4                                              |          |
| Density (calculated)   | 1.276 Mg/m <sup>3</sup>                        |          |
| Absorption coefficient | 0.705 mm <sup>-1</sup>                         |          |
| F(000)                 | 520                                            |          |

|                                   |                                             |
|-----------------------------------|---------------------------------------------|
| Crystal size                      | 0.100 x 0.040 x 0.040 mm <sup>3</sup>       |
| Theta range for data collection   | 4.321 to 68.329°.                           |
| Index ranges                      | -8<=h<=8, -10<=k<=9, -24<=l<=24             |
| Reflections collected             | 18197                                       |
| Independent reflections           | 2259 [R(int) = 0.0248]                      |
| Completeness to theta = 67.000°   | 100.0 %                                     |
| Absorption correction             | Semi-empirical from equivalents             |
| Max. and min. transmission        | 0.753 and 0.708                             |
| Refinement method                 | Full-matrix least-squares on F <sup>2</sup> |
| Data / restraints / parameters    | 2259 / 0 / 165                              |
| Goodness-of-fit on F <sup>2</sup> | 1.080                                       |
| Final R indices [I>2sigma(I)]     | R1 = 0.0260, wR2 = 0.0722                   |
| R indices (all data)              | R1 = 0.0263, wR2 = 0.0724                   |
| Absolute structure parameter      | 0.06(3)                                     |
| Extinction coefficient            | n/a                                         |
| Largest diff. peak and hole       | 0.217 and -0.160 e.Å <sup>-3</sup>          |

Table 2. Atomic coordinates ( x 10<sup>4</sup>) and equivalent isotropic displacement parameters (Å<sup>2</sup>x 10<sup>3</sup>)

for mp001. U(eq) is defined as one third of the trace of the orthogonalized U<sup>ij</sup> tensor.

|       | x       | y       | z       | U(eq) |
|-------|---------|---------|---------|-------|
| C(1)  | 5288(2) | 5140(2) | 5101(1) | 15(1) |
| C(2)  | 7066(2) | 5306(2) | 5448(1) | 18(1) |
| C(3)  | 7040(2) | 5137(2) | 6180(1) | 24(1) |
| C(4)  | 8604(2) | 5575(2) | 5108(1) | 16(1) |
| C(5)  | 8691(2) | 5723(2) | 4381(1) | 16(1) |
| C(6)  | 6795(2) | 5938(2) | 4064(1) | 13(1) |
| C(7)  | 5368(2) | 4775(2) | 4368(1) | 14(1) |
| C(8)  | 5893(2) | 2982(2) | 4326(1) | 18(1) |
| C(9)  | 3470(2) | 5050(2) | 4062(1) | 16(1) |
| C(10) | 3543(2) | 4956(2) | 3315(1) | 17(1) |
| C(11) | 4886(2) | 6175(2) | 3040(1) | 16(1) |
| C(12) | 6867(2) | 5959(2) | 3302(1) | 14(1) |
| C(13) | 7785(2) | 4479(2) | 2993(1) | 18(1) |
| C(14) | 8024(2) | 7410(2) | 3077(1) | 17(1) |

|      |         |         |         |       |
|------|---------|---------|---------|-------|
| O(1) | 3819(2) | 5228(2) | 5395(1) | 20(1) |
| O(2) | 4922(2) | 6145(2) | 2340(1) | 20(1) |
| O(3) | 7397(2) | 8923(1) | 3316(1) | 20(1) |

Table 3. Bond lengths [ $\text{\AA}$ ] and angles [ $^\circ$ ] for mp001.

|                |            |
|----------------|------------|
| C(1)-O(1)      | 1.227(2)   |
| C(1)-C(2)      | 1.481(2)   |
| C(1)-C(7)      | 1.530(2)   |
| C(2)-C(4)      | 1.335(2)   |
| C(2)-C(3)      | 1.504(2)   |
| C(3)-H(3A)     | 0.9800     |
| C(3)-H(3B)     | 0.9800     |
| C(3)-H(3C)     | 0.9800     |
| C(4)-C(5)      | 1.494(2)   |
| C(4)-H(4)      | 0.9500     |
| C(5)-C(6)      | 1.532(2)   |
| C(5)-H(5A)     | 0.9900     |
| C(5)-H(5B)     | 0.9900     |
| C(6)-C(7)      | 1.550(2)   |
| C(6)-C(12)     | 1.5598(19) |
| C(6)-H(6)      | 1.0000     |
| C(7)-C(9)      | 1.531(2)   |
| C(7)-C(8)      | 1.547(2)   |
| C(8)-H(8A)     | 0.9800     |
| C(8)-H(8B)     | 0.9800     |
| C(8)-H(8C)     | 0.9800     |
| C(9)-C(10)     | 1.531(2)   |
| C(9)-H(9A)     | 0.9900     |
| C(9)-H(9B)     | 0.9900     |
| C(10)-C(11)    | 1.518(2)   |
| C(10)-H(10A)   | 0.9900     |
| C(10)-H(10B)   | 0.9900     |
| C(11)-O(2)     | 1.4324(18) |
| C(11)-C(12)    | 1.546(2)   |
| C(11)-H(11)    | 1.0000     |
| C(12)-C(13)    | 1.540(2)   |
| C(12)-C(14)    | 1.545(2)   |
| C(13)-H(13A)   | 0.9800     |
| C(13)-H(13B)   | 0.9800     |
| C(13)-H(13C)   | 0.9800     |
| C(14)-O(3)     | 1.429(2)   |
| C(14)-H(14A)   | 0.9900     |
| C(14)-H(14B)   | 0.9900     |
| O(2)-H(2)      | 0.88(3)    |
| O(3)-H(3)      | 0.84(2)    |
| O(1)-C(1)-C(2) | 121.06(13) |
| O(1)-C(1)-C(7) | 121.75(14) |
| C(2)-C(1)-C(7) | 117.12(13) |
| C(4)-C(2)-C(1) | 119.58(14) |

|                     |            |
|---------------------|------------|
| C(4)-C(2)-C(3)      | 123.13(15) |
| C(1)-C(2)-C(3)      | 117.28(14) |
| C(2)-C(3)-H(3A)     | 109.5      |
| C(2)-C(3)-H(3B)     | 109.5      |
| H(3A)-C(3)-H(3B)    | 109.5      |
| C(2)-C(3)-H(3C)     | 109.5      |
| H(3A)-C(3)-H(3C)    | 109.5      |
| H(3B)-C(3)-H(3C)    | 109.5      |
| C(2)-C(4)-C(5)      | 124.71(15) |
| C(2)-C(4)-H(4)      | 117.6      |
| C(5)-C(4)-H(4)      | 117.6      |
| C(4)-C(5)-C(6)      | 113.13(13) |
| C(4)-C(5)-H(5A)     | 109.0      |
| C(6)-C(5)-H(5A)     | 109.0      |
| C(4)-C(5)-H(5B)     | 109.0      |
| C(6)-C(5)-H(5B)     | 109.0      |
| H(5A)-C(5)-H(5B)    | 107.8      |
| C(5)-C(6)-C(7)      | 110.92(12) |
| C(5)-C(6)-C(12)     | 113.20(12) |
| C(7)-C(6)-C(12)     | 115.52(12) |
| C(5)-C(6)-H(6)      | 105.4      |
| C(7)-C(6)-H(6)      | 105.4      |
| C(12)-C(6)-H(6)     | 105.4      |
| C(1)-C(7)-C(9)      | 109.64(12) |
| C(1)-C(7)-C(8)      | 104.86(13) |
| C(9)-C(7)-C(8)      | 110.12(13) |
| C(1)-C(7)-C(6)      | 107.11(12) |
| C(9)-C(7)-C(6)      | 110.08(12) |
| C(8)-C(7)-C(6)      | 114.79(13) |
| C(7)-C(8)-H(8A)     | 109.5      |
| C(7)-C(8)-H(8B)     | 109.5      |
| H(8A)-C(8)-H(8B)    | 109.5      |
| C(7)-C(8)-H(8C)     | 109.5      |
| H(8A)-C(8)-H(8C)    | 109.5      |
| H(8B)-C(8)-H(8C)    | 109.5      |
| C(7)-C(9)-C(10)     | 111.66(12) |
| C(7)-C(9)-H(9A)     | 109.3      |
| C(10)-C(9)-H(9A)    | 109.3      |
| C(7)-C(9)-H(9B)     | 109.3      |
| C(10)-C(9)-H(9B)    | 109.3      |
| H(9A)-C(9)-H(9B)    | 107.9      |
| C(11)-C(10)-C(9)    | 111.04(12) |
| C(11)-C(10)-H(10A)  | 109.4      |
| C(9)-C(10)-H(10A)   | 109.4      |
| C(11)-C(10)-H(10B)  | 109.4      |
| C(9)-C(10)-H(10B)   | 109.4      |
| H(10A)-C(10)-H(10B) | 108.0      |
| O(2)-C(11)-C(10)    | 111.80(13) |
| O(2)-C(11)-C(12)    | 109.17(12) |
| C(10)-C(11)-C(12)   | 112.95(12) |
| O(2)-C(11)-H(11)    | 107.6      |



|                     |            |
|---------------------|------------|
| C(10)-C(11)-H(11)   | 107.6      |
| C(12)-C(11)-H(11)   | 107.6      |
| C(13)-C(12)-C(14)   | 105.72(12) |
| C(13)-C(12)-C(11)   | 110.71(12) |
| C(14)-C(12)-C(11)   | 108.07(12) |
| C(13)-C(12)-C(6)    | 114.63(12) |
| C(14)-C(12)-C(6)    | 108.99(12) |
| C(11)-C(12)-C(6)    | 108.51(11) |
| C(12)-C(13)-H(13A)  | 109.5      |
| C(12)-C(13)-H(13B)  | 109.5      |
| H(13A)-C(13)-H(13B) | 109.5      |
| C(12)-C(13)-H(13C)  | 109.5      |
| H(13A)-C(13)-H(13C) | 109.5      |
| H(13B)-C(13)-H(13C) | 109.5      |
| O(3)-C(14)-C(12)    | 114.69(13) |
| O(3)-C(14)-H(14A)   | 108.6      |
| C(12)-C(14)-H(14A)  | 108.6      |
| O(3)-C(14)-H(14B)   | 108.6      |
| C(12)-C(14)-H(14B)  | 108.6      |
| H(14A)-C(14)-H(14B) | 107.6      |
| C(11)-O(2)-H(2)     | 109.6(14)  |
| C(14)-O(3)-H(3)     | 109.0(17)  |

---

Symmetry transformations used to generate equivalent atoms:

Table 4. Anisotropic displacement parameters ( $\text{\AA}^2 \times 10^3$ ) for mp001. The anisotropic displacement factor exponent takes the form:  $-2\pi^2 [h^2 a^{*2} U^{11} + \dots + 2 h k a^* b^* U^{12}]$

---

|       | U <sup>11</sup> | U <sup>22</sup> | U <sup>33</sup> | U <sup>23</sup> | U <sup>13</sup> | U <sup>12</sup> |
|-------|-----------------|-----------------|-----------------|-----------------|-----------------|-----------------|
| C(1)  | 20(1)           | 9(1)            | 16(1)           | 1(1)            | 0(1)            | 0(1)            |
| C(2)  | 23(1)           | 13(1)           | 16(1)           | -2(1)           | -4(1)           | 2(1)            |
| C(3)  | 28(1)           | 28(1)           | 16(1)           | 0(1)            | -4(1)           | 4(1)            |
| C(4)  | 19(1)           | 12(1)           | 18(1)           | -1(1)           | -6(1)           | 1(1)            |
| C(5)  | 15(1)           | 16(1)           | 18(1)           | 1(1)            | -1(1)           | 1(1)            |
| C(6)  | 14(1)           | 12(1)           | 13(1)           | -1(1)           | 0(1)            | 1(1)            |
| C(7)  | 14(1)           | 13(1)           | 14(1)           | 0(1)            | 0(1)            | 0(1)            |
| C(8)  | 21(1)           | 13(1)           | 19(1)           | -1(1)           | -1(1)           | -2(1)           |
| C(9)  | 14(1)           | 20(1)           | 16(1)           | -1(1)           | 0(1)            | -1(1)           |
| C(10) | 14(1)           | 21(1)           | 17(1)           | -2(1)           | -3(1)           | -1(1)           |
| C(11) | 17(1)           | 18(1)           | 13(1)           | -2(1)           | -2(1)           | 1(1)            |
| C(12) | 15(1)           | 14(1)           | 12(1)           | 0(1)            | 0(1)            | -1(1)           |
| C(13) | 18(1)           | 20(1)           | 17(1)           | -3(1)           | 1(1)            | 2(1)            |
| C(14) | 20(1)           | 17(1)           | 14(1)           | 2(1)            | -1(1)           | -2(1)           |
| O(1)  | 21(1)           | 22(1)           | 16(1)           | -2(1)           | 4(1)            | -3(1)           |
| O(2)  | 23(1)           | 22(1)           | 13(1)           | 1(1)            | -4(1)           | -5(1)           |

O(3) 27(1) 16(1) 18(1) 1(1) -7(1) -1(1)

Table 5. Hydrogen coordinates ( $\times 10^4$ ) and isotropic displacement parameters ( $\text{\AA}^2 \times 10^3$ ) for mp001.

|        | x        | y        | z        | U(eq) |
|--------|----------|----------|----------|-------|
| H(3A)  | 8305     | 5050     | 6343     | 36    |
| H(3B)  | 6350     | 4171     | 6300     | 36    |
| H(3C)  | 6446     | 6078     | 6374     | 36    |
| H(4)   | 9723     | 5678     | 5344     | 19    |
| H(5A)  | 9280     | 4751     | 4199     | 19    |
| H(5B)  | 9475     | 6652     | 4266     | 19    |
| H(6)   | 6380     | 7035     | 4194     | 16    |
| H(8A)  | 5098     | 2361     | 4619     | 26    |
| H(8B)  | 7182     | 2844     | 4457     | 26    |
| H(8C)  | 5732     | 2605     | 3876     | 26    |
| H(9A)  | 3004     | 6116     | 4194     | 20    |
| H(9B)  | 2600     | 4233     | 4229     | 20    |
| H(10A) | 3927     | 3866     | 3182     | 21    |
| H(10B) | 2300     | 5158     | 3135     | 21    |
| H(11)  | 4452     | 7261     | 3176     | 19    |
| H(13A) | 8082     | 4707     | 2535     | 27    |
| H(13B) | 6939     | 3566     | 3015     | 27    |
| H(13C) | 8918     | 4224     | 3231     | 27    |
| H(14A) | 9313     | 7249     | 3220     | 20    |
| H(14B) | 8022     | 7442     | 2593     | 20    |
| H(2)   | 4200(30) | 5370(30) | 2196(11) | 33(6) |
| H(3)   | 7900(30) | 9110(30) | 3677(12) | 34(6) |

**Table 1 Crystal data and structure refinement for IB001 (CCDC 1831587)**

|                     |                                                |
|---------------------|------------------------------------------------|
| Identification code | IB001                                          |
| Empirical formula   | C <sub>14</sub> H <sub>24</sub> O <sub>4</sub> |
| Formula weight      | 256.33                                         |
| Temperature/K       | 100(2)                                         |
| Crystal system      | orthorhombic                                   |
| Space group         | P2 <sub>1</sub> 2 <sub>1</sub> 2 <sub>1</sub>  |
| a/\AA               | 7.21010(10)                                    |

|                                                |                                                               |
|------------------------------------------------|---------------------------------------------------------------|
| b/Å                                            | 11.2298(3)                                                    |
| c/Å                                            | 16.4264(3)                                                    |
| $\alpha/^\circ$                                | 90                                                            |
| $\beta/^\circ$                                 | 90                                                            |
| $\gamma/^\circ$                                | 90                                                            |
| Volume/Å <sup>3</sup>                          | 1330.01(5)                                                    |
| Z                                              | 4                                                             |
| $\rho_{\text{calc}}/\text{cm}^3$               | 1.280                                                         |
| $\mu/\text{mm}^{-1}$                           | 0.749                                                         |
| F(000)                                         | 560.0                                                         |
| Crystal size/mm <sup>3</sup>                   | 0.05 × 0.05 × 0.03                                            |
| Radiation                                      | CuK $\alpha$ ( $\lambda = 1.54184$ )                          |
| 2 $\Theta$ range for data collection/ $^\circ$ | 9.54 to 157.698                                               |
| Index ranges                                   | -9 ≤ h ≤ 9, -14 ≤ k ≤ 14, -20 ≤ l ≤ 12                        |
| Reflections collected                          | 14075                                                         |
| Independent reflections                        | 2801 [R <sub>int</sub> = 0.0452, R <sub>sigma</sub> = 0.0303] |
| Data/restraints/parameters                     | 2801/0/182                                                    |
| Goodness-of-fit on F <sup>2</sup>              | 1.062                                                         |
| Final R indexes [I ≥ 2 $\sigma$ (I)]           | R <sub>1</sub> = 0.0353, wR <sub>2</sub> = 0.0923             |
| Final R indexes [all data]                     | R <sub>1</sub> = 0.0386, wR <sub>2</sub> = 0.0961             |
| Largest diff. peak/hole / e Å <sup>-3</sup>    | 0.20/-0.18                                                    |
| Flack parameter                                | -0.11(10)                                                     |

**Table 2 Fractional Atomic Coordinates ( $\times 10^4$ ) and Equivalent Isotropic Displacement Parameters ( $\text{\AA}^2 \times 10^3$ ) for IB001.  $U_{\text{eq}}$  is defined as 1/3 of the trace of the orthogonalised  $U_{ij}$  tensor.**

| Atom | x       | y          | z          | U(eq)   |
|------|---------|------------|------------|---------|
| O2   | 4401(2) | 6426.1(13) | 5729.1(9)  | 22.0(3) |
| O1   | 5088(2) | 912.8(14)  | 6645.0(9)  | 24.1(3) |
| O3   | 1109(2) | 6680.5(13) | 6529.7(9)  | 23.6(3) |
| O4   | 7943(2) | 7212.0(16) | 5574.0(11) | 28.8(4) |
| C4   | 3698(3) | 2854.7(18) | 6658.0(12) | 17.7(4) |
| C5   | 2253(3) | 3393.7(19) | 6065.1(12) | 17.6(4) |

|     |         |            |            |         |
|-----|---------|------------|------------|---------|
| C14 | 1511(3) | 5454.0(18) | 6698.2(12) | 20.0(4) |
| C7  | 329(3)  | 1559.2(19) | 6301.8(13) | 23.0(4) |
| C6  | 322(3)  | 2889.5(19) | 6243.5(13) | 22.2(4) |
| C3  | 3673(3) | 1496.9(19) | 6553.2(12) | 20.8(4) |
| C11 | 4313(3) | 5145.0(18) | 5775.2(12) | 19.2(4) |
| C12 | 2290(3) | 4776.7(18) | 5950.4(12) | 17.6(4) |
| C10 | 5683(3) | 4679.7(19) | 6402.4(13) | 20.7(4) |
| C8  | 3292(3) | 3048.8(18) | 7570.9(12) | 22.0(4) |
| C13 | 1114(3) | 5069(2)    | 5193.7(12) | 22.1(4) |
| C9  | 5629(3) | 3321.0(19) | 6442.2(13) | 20.5(4) |
| C2  | 1862(3) | 902(2)     | 6411.6(12) | 23.4(4) |
| C1  | 1844(4) | -435(2)    | 6422.8(15) | 28.5(5) |

**Table 3 Anisotropic Displacement Parameters ( $\text{\AA}^2 \times 10^3$ ) for IB001. The anisotropic displacement factor exponent takes the form:  $-2\pi^2[h^2a^*U_{11}+2hka^*b^*U_{12}+\dots]$ .**

| Atom | $U_{11}$ | $U_{22}$ | $U_{33}$ | $U_{23}$ | $U_{13}$ | $U_{12}$ |
|------|----------|----------|----------|----------|----------|----------|
| O2   | 19.4(8)  | 20.2(7)  | 26.4(8)  | 4.6(6)   | -1.7(6)  | -2.4(6)  |
| O1   | 23.0(7)  | 23.1(7)  | 26.3(7)  | 1.3(6)   | 1.9(6)   | 4.3(6)   |
| O3   | 22.0(7)  | 19.3(7)  | 29.6(8)  | 0.5(6)   | 2.1(6)   | 2.8(6)   |
| O4   | 22.0(8)  | 33.9(9)  | 30.4(8)  | 11.3(7)  | -0.4(7)  | 0.9(7)   |
| C4   | 14.8(9)  | 19.0(9)  | 19.3(9)  | 0.5(7)   | 1.3(8)   | -0.3(7)  |
| C5   | 15.3(9)  | 18.2(9)  | 19.2(9)  | -2.3(8)  | -1.0(7)  | -0.2(7)  |
| C14  | 19.2(9)  | 19.4(10) | 21.4(9)  | 0.3(8)   | 0.7(8)   | 1.0(7)   |
| C7   | 20.8(10) | 23.6(10) | 24.7(10) | -1.7(8)  | 0.8(8)   | -6.3(8)  |
| C6   | 17.2(10) | 22.5(10) | 26.8(10) | -0.4(8)  | -0.7(8)  | -1.5(8)  |
| C3   | 21.4(10) | 21.4(10) | 19.7(9)  | 0.5(8)   | 1.9(8)   | 2.7(8)   |
| C11  | 20.2(10) | 18.1(9)  | 19.3(9)  | 1.9(8)   | 0.0(8)   | -0.7(7)  |
| C12  | 16.4(9)  | 19.6(10) | 16.9(9)  | -0.1(7)  | -1.8(7)  | 0.2(8)   |
| C10  | 16.0(9)  | 22.3(10) | 23.7(10) | 2.5(8)   | -0.6(7)  | -0.8(7)  |
| C8   | 24.3(10) | 22.2(10) | 19.5(9)  | 1.1(8)   | 0.0(8)   | -0.4(8)  |
| C13  | 18.7(9)  | 25.2(10) | 22.4(10) | 2.8(8)   | -3.7(8)  | -0.8(8)  |
| C9   | 17.5(9)  | 20.9(10) | 23.1(10) | 1.2(8)   | 0.3(8)   | 2.9(8)   |
| C2   | 29.2(11) | 20.9(10) | 20(1)    | -1.0(8)  | 1.8(8)   | -4.2(9)  |
| C1   | 36.5(12) | 19.4(10) | 29.7(11) | -0.1(9)  | 0.7(10)  | -3.8(9)  |

**Table 4 Bond Lengths for IB001.**

| Atom | Atom | Length/ $\text{\AA}$ | Atom | Atom | Length/ $\text{\AA}$ |
|------|------|----------------------|------|------|----------------------|
| O2   | C11  | 1.442(2)             | C14  | C12  | 1.550(3)             |
| O1   | C3   | 1.222(2)             | C7   | C6   | 1.497(3)             |
| O3   | C14  | 1.434(2)             | C7   | C2   | 1.341(3)             |
| C4   | C5   | 1.550(3)             | C3   | C2   | 1.485(3)             |
| C4   | C3   | 1.535(3)             | C11  | C12  | 1.543(3)             |

|    |     |          |     |     |          |
|----|-----|----------|-----|-----|----------|
| C4 | C8  | 1.543(3) | C11 | C10 | 1.520(3) |
| C4 | C9  | 1.529(3) | C12 | C13 | 1.540(3) |
| C5 | C6  | 1.532(3) | C10 | C9  | 1.528(3) |
| C5 | C12 | 1.565(3) | C2  | C1  | 1.502(3) |

**Table 5 Bond Angles for IB001.**

| Atom | Atom | Atom | Angle/°    | Atom | Atom | Atom | Angle/°    |
|------|------|------|------------|------|------|------|------------|
| C3   | C4   | C5   | 108.04(16) | O2   | C11  | C12  | 108.59(16) |
| C3   | C4   | C8   | 104.31(16) | O2   | C11  | C10  | 110.48(16) |
| C8   | C4   | C5   | 115.33(16) | C10  | C11  | C12  | 113.32(16) |
| C9   | C4   | C5   | 109.43(16) | C14  | C12  | C5   | 112.68(16) |
| C9   | C4   | C3   | 108.97(16) | C11  | C12  | C5   | 107.72(16) |
| C9   | C4   | C8   | 110.48(17) | C11  | C12  | C14  | 111.02(16) |
| C4   | C5   | C12  | 116.88(16) | C13  | C12  | C5   | 107.43(16) |
| C6   | C5   | C4   | 110.30(16) | C13  | C12  | C14  | 109.61(16) |
| C6   | C5   | C12  | 113.90(16) | C13  | C12  | C11  | 108.22(16) |
| O3   | C14  | C12  | 113.05(16) | C11  | C10  | C9   | 110.84(16) |
| C2   | C7   | C6   | 124.08(19) | C10  | C9   | C4   | 112.04(16) |
| C7   | C6   | C5   | 112.21(17) | C7   | C2   | C3   | 119.92(19) |
| O1   | C3   | C4   | 120.65(18) | C7   | C2   | C1   | 123.0(2)   |
| O1   | C3   | C2   | 120.79(19) | C3   | C2   | C1   | 117.1(2)   |
| C2   | C3   | C4   | 118.33(17) |      |      |      |            |

**Table 6 Hydrogen Atom Coordinates ( $\text{\AA}\times 10^4$ ) and Isotropic Displacement Parameters ( $\text{\AA}^2\times 10^3$ ) for IB001.**

| Atom | x       | y       | z       | U(eq) |
|------|---------|---------|---------|-------|
| H5   | 2590.14 | 3063.95 | 5519.3  | 21    |
| H14A | 362     | 5054.92 | 6883.89 | 24    |
| H14B | 2424.66 | 5410.92 | 7147.05 | 24    |
| H7   | -824.52 | 1155.06 | 6258.24 | 28    |
| H6A  | -139.39 | 3227.14 | 6762.13 | 27    |
| H6B  | -540.35 | 3136.55 | 5805.74 | 27    |
| H11  | 4669.65 | 4815.74 | 5231.66 | 23    |
| H10A | 5375.54 | 5012.91 | 6943.82 | 25    |
| H10B | 6950.36 | 4944.02 | 6257.08 | 25    |
| H8A  | 3463.11 | 3891.5  | 7706.5  | 33    |
| H8B  | 4143.69 | 2563.95 | 7896.86 | 33    |
| H8C  | 2010.59 | 2814.25 | 7688.92 | 33    |
| H13A | 1500.83 | 4560.2  | 4739.71 | 33    |
| H13B | 1291.47 | 5906.6  | 5045.42 | 33    |
| H13C | -198.36 | 4926.25 | 5314.39 | 33    |
| H9A  | 6528.44 | 3041.79 | 6855.58 | 25    |
| H9B  | 6008.65 | 2991.02 | 5908.75 | 25    |
| H1A  | 567.49  | -720.16 | 6360.58 | 43    |
| H1B  | 2349.47 | -719.42 | 6941.4  | 43    |
| H1C  | 2604.35 | -738.12 | 5973.69 | 43    |

|     |          |          |          |        |
|-----|----------|----------|----------|--------|
| H3  | 2110(50) | 6990(30) | 6336(18) | 33(8)  |
| H4A | 8850(50) | 7070(30) | 5870(20) | 42(9)  |
| H2  | 5600(60) | 6610(30) | 5690(20) | 59(11) |
| H4B | 8370(50) | 7720(40) | 5190(20) | 56(10) |

### Crystal structure determination of [IB001]

**Crystal Data** for  $C_{14}H_{24}O_4$  ( $M = 256.33$  g/mol): orthorhombic, space group  $P2_12_12_1$  (no. 19),  $a = 7.21010(10)$  Å,  $b = 11.2298(3)$  Å,  $c = 16.4264(3)$  Å,  $V = 1330.01(5)$  Å<sup>3</sup>,  $Z = 4$ ,  $T = 100(2)$  K,  $\mu(\text{CuK}\alpha) = 0.749$  mm<sup>-1</sup>,  $D_{\text{calc}} = 1.280$  g/cm<sup>3</sup>, 14075 reflections measured ( $9.54^\circ \leq 2\Theta \leq 157.698^\circ$ ), 2801 unique ( $R_{\text{int}} = 0.0452$ ,  $R_{\text{sigma}} = 0.0303$ ) which were used in all calculations. The final  $R_1$  was 0.0353 ( $I > 2\sigma(I)$ ) and  $wR_2$  was 0.0961 (all data).

### Refinement model description

Number of restraints - 0, number of constraints - unknown.

# Copies of $^1\text{H}$ - and $^{13}\text{C}$ -NMR Spectra

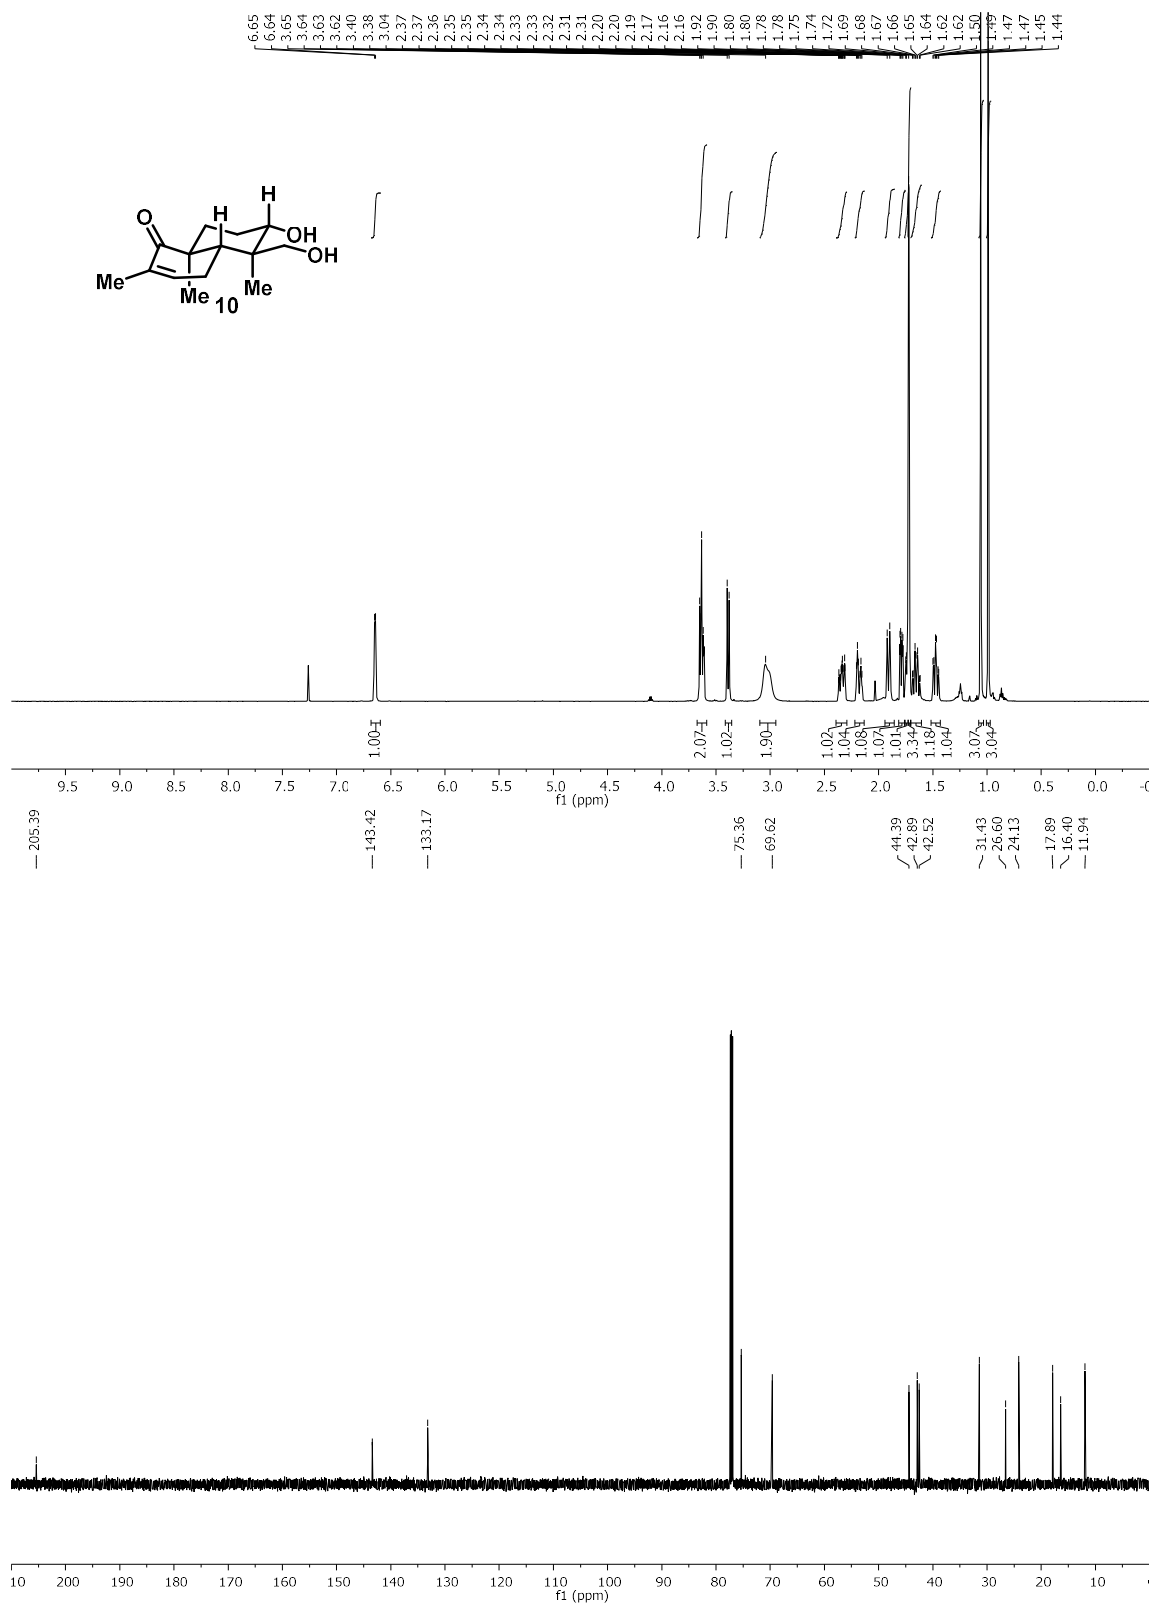

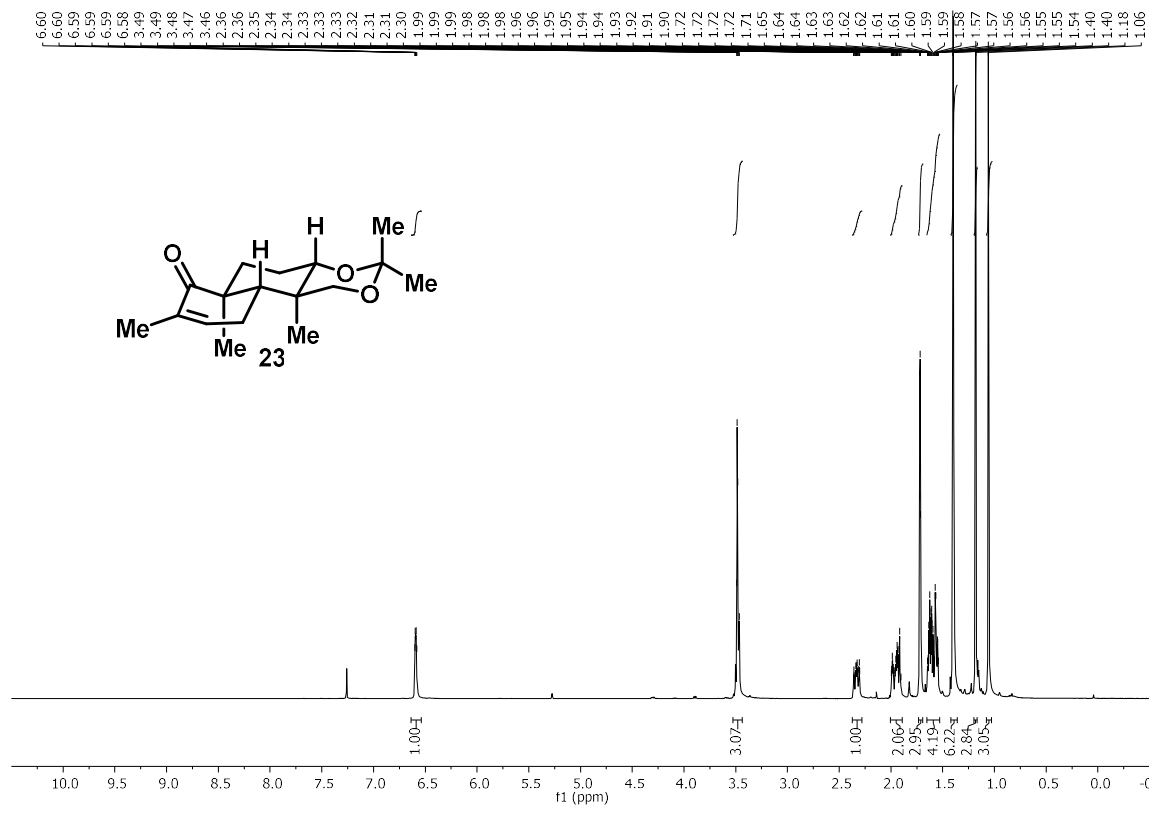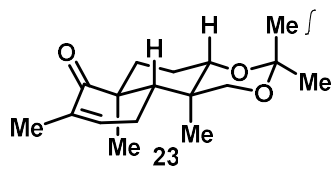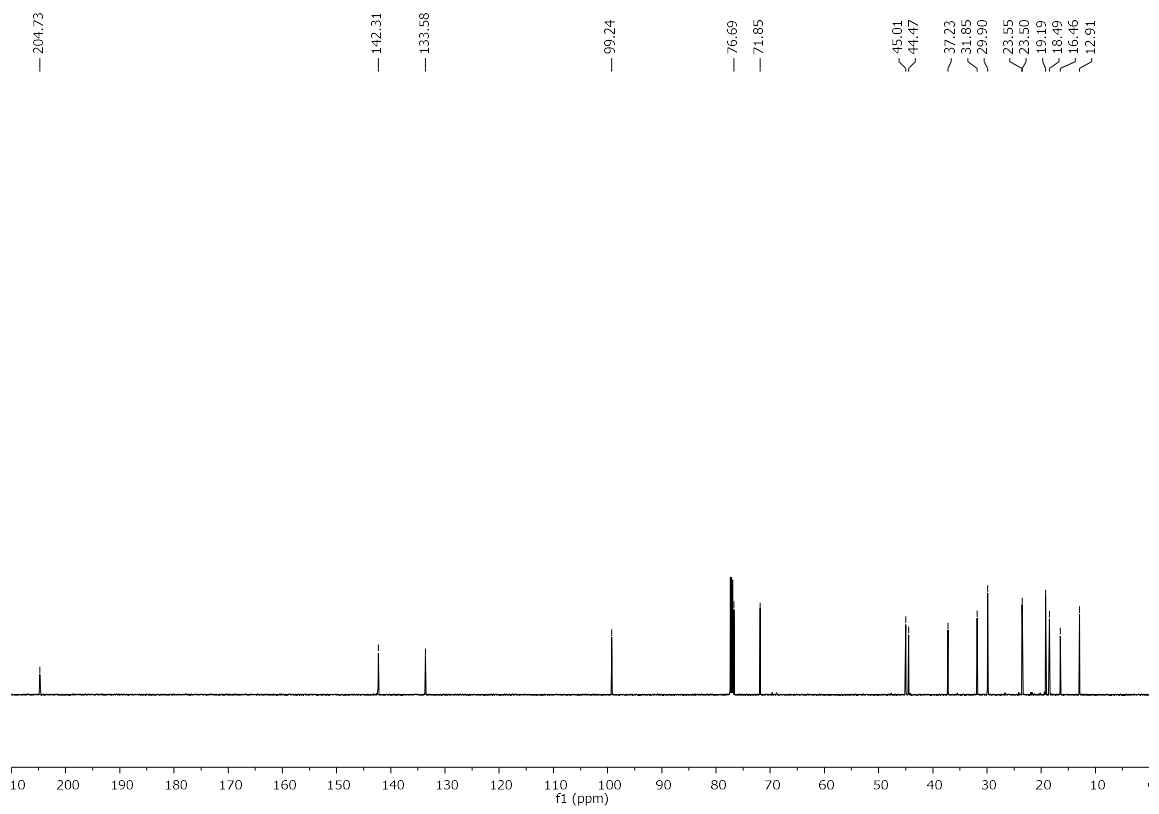



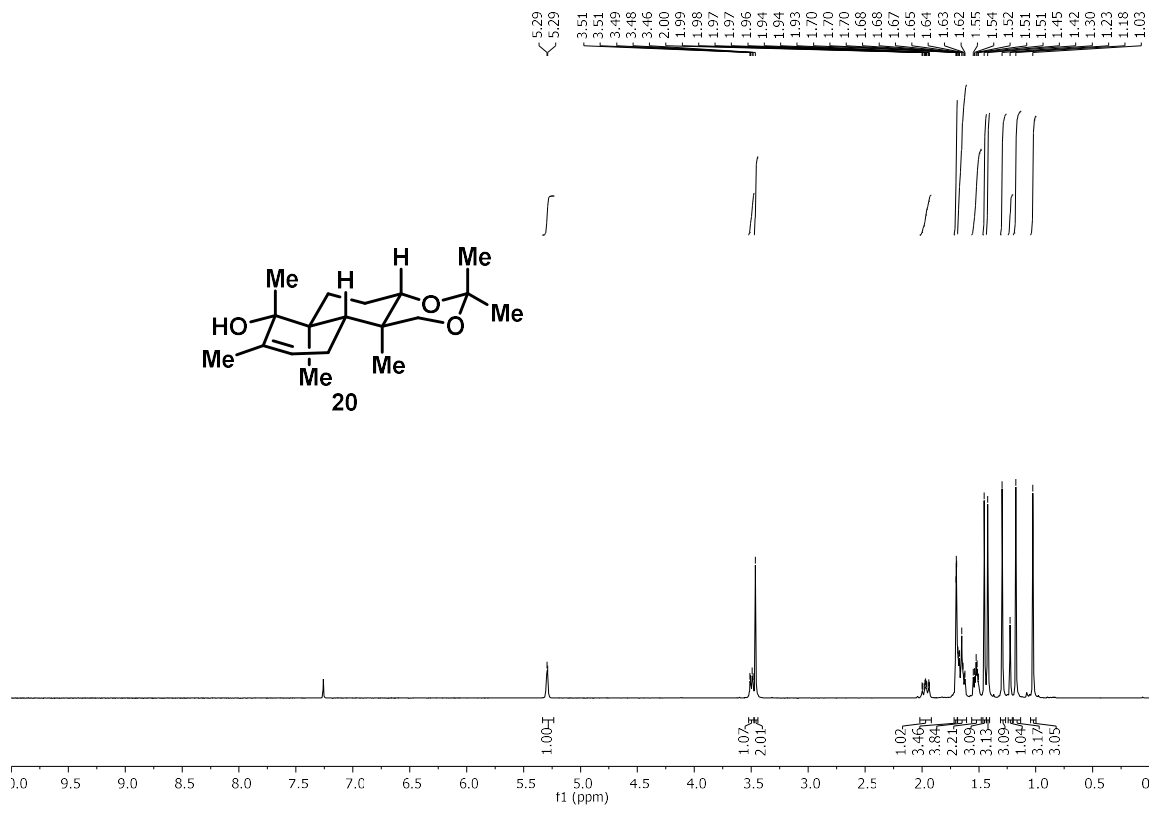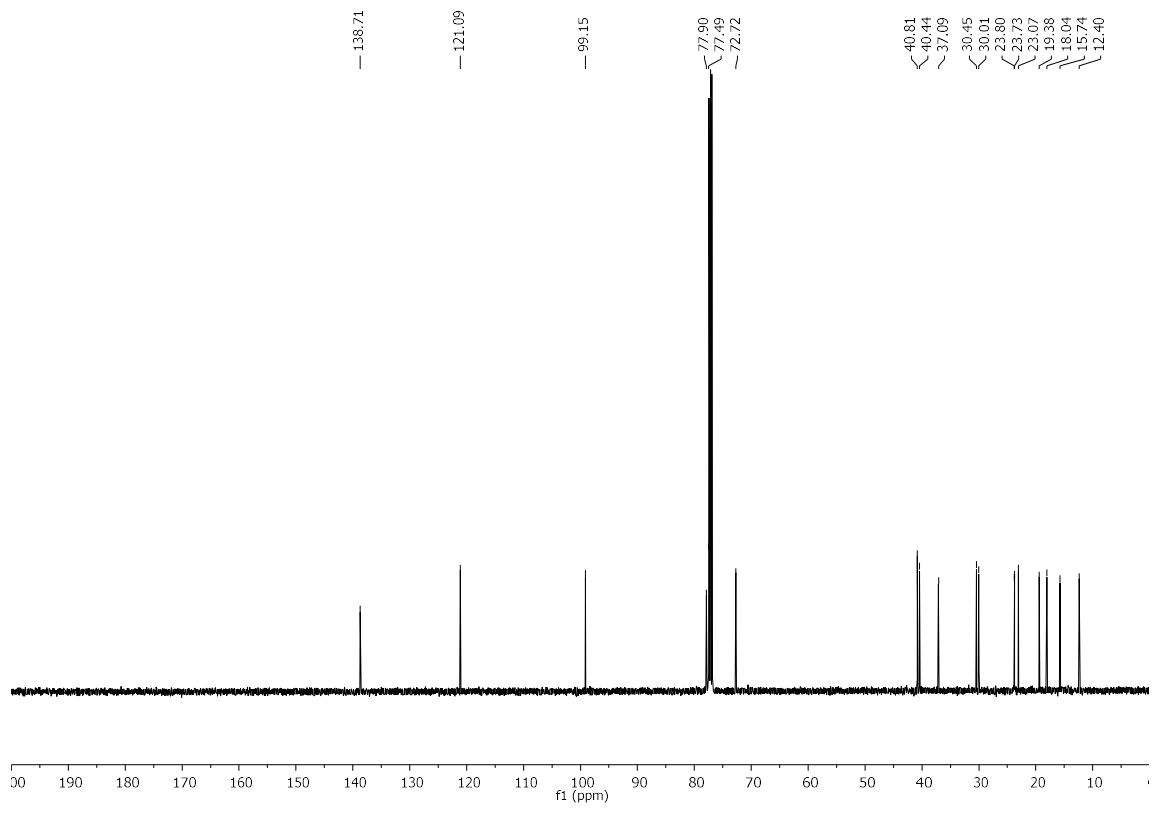

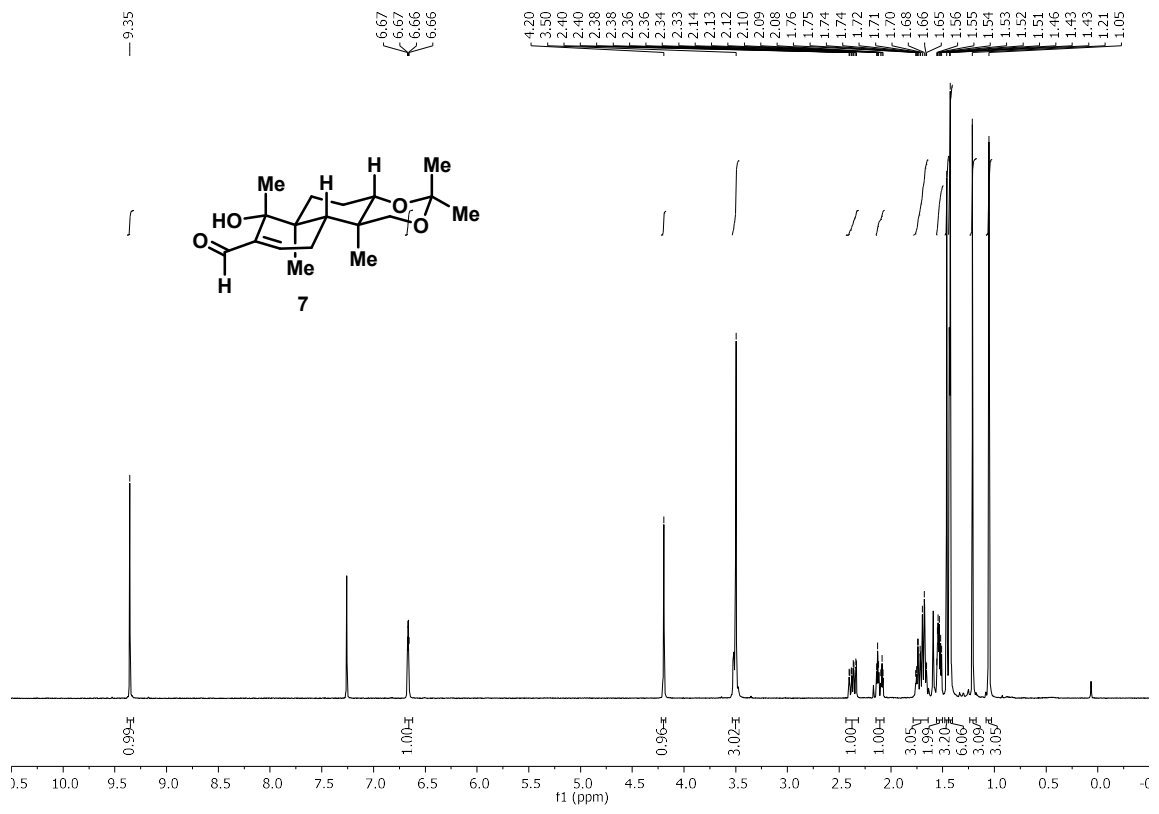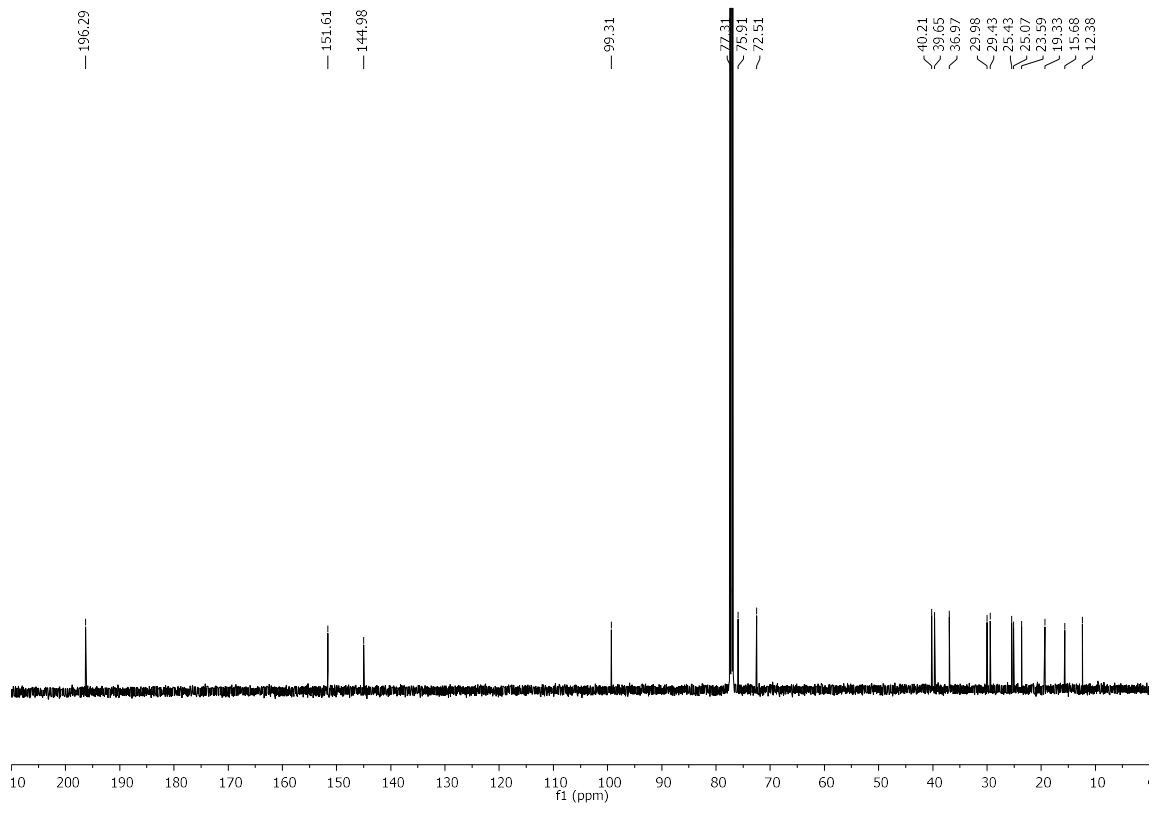

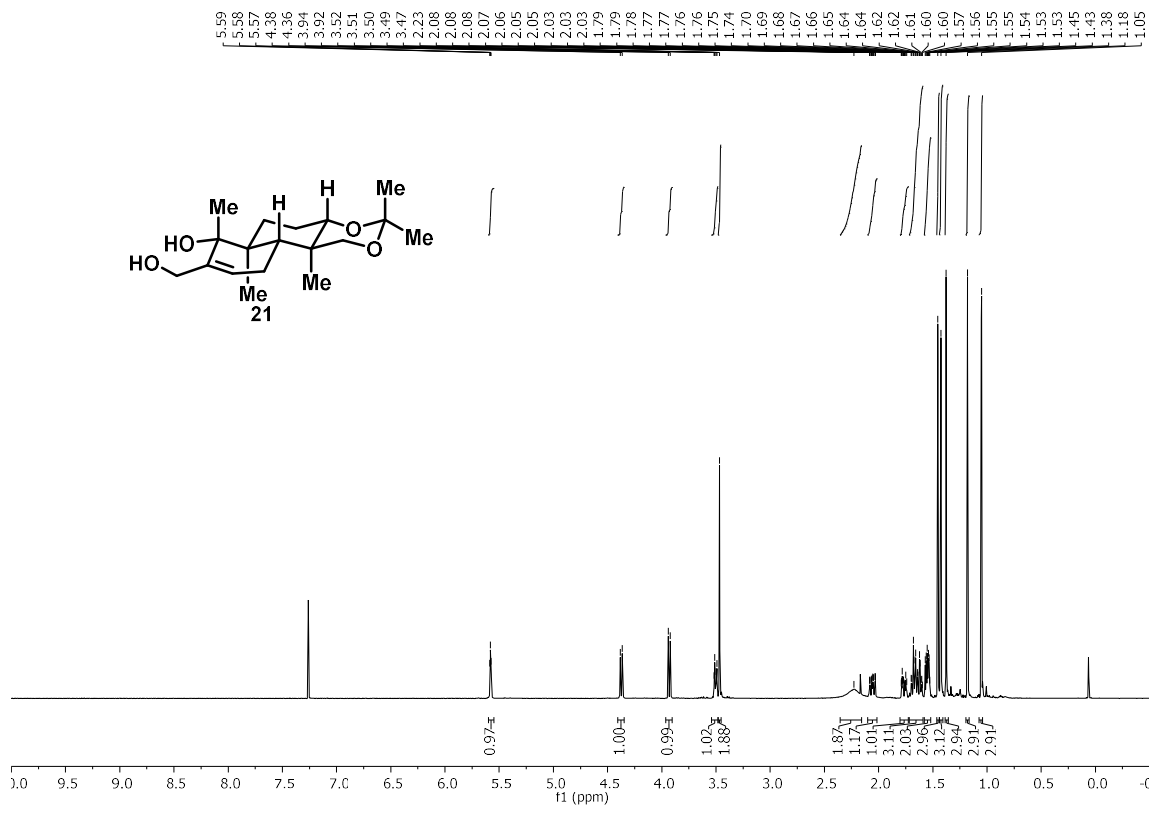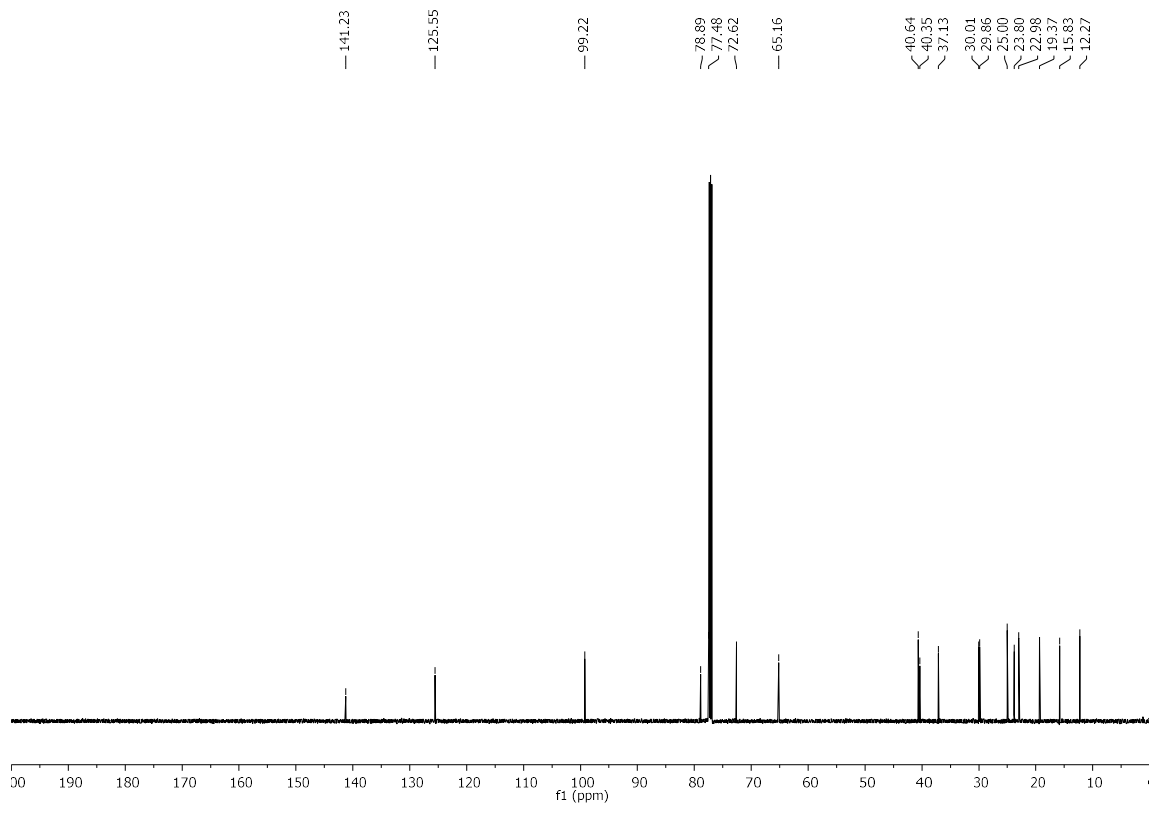

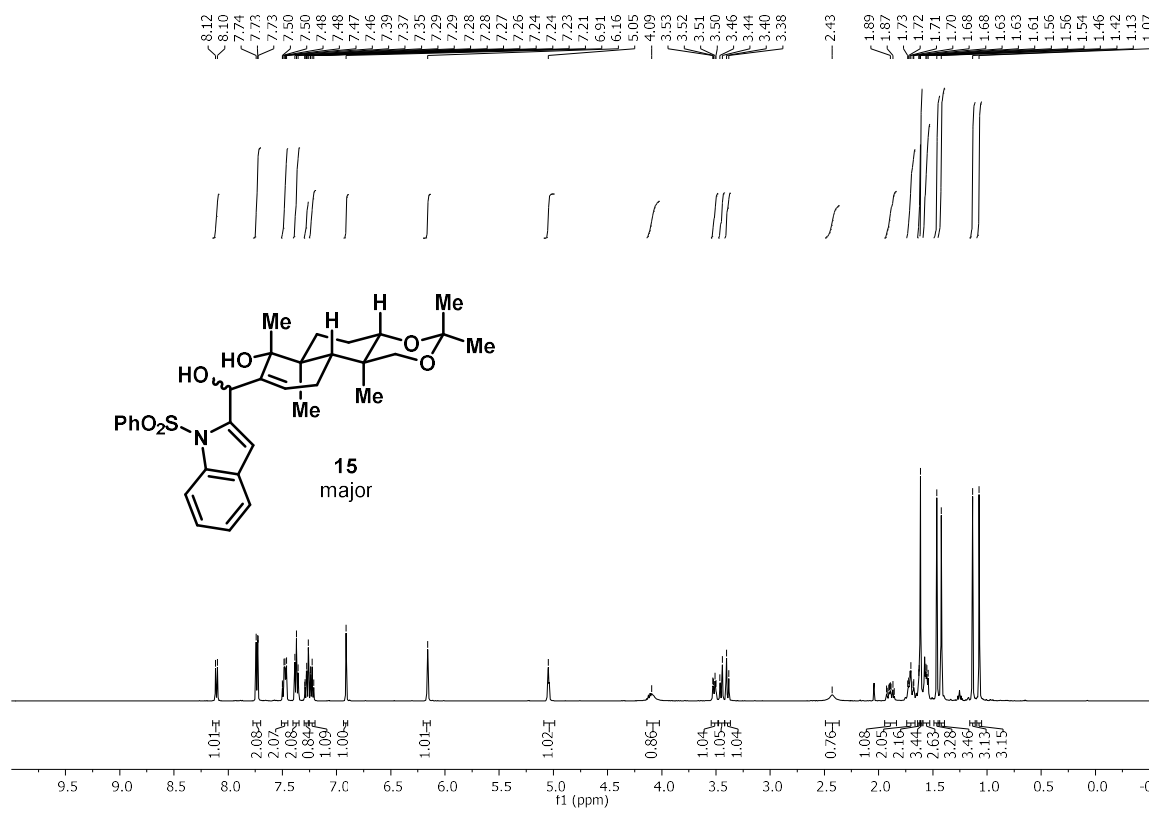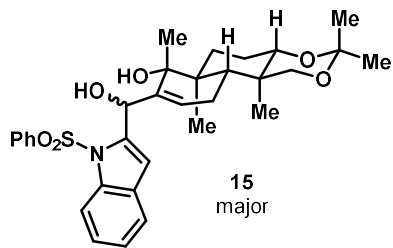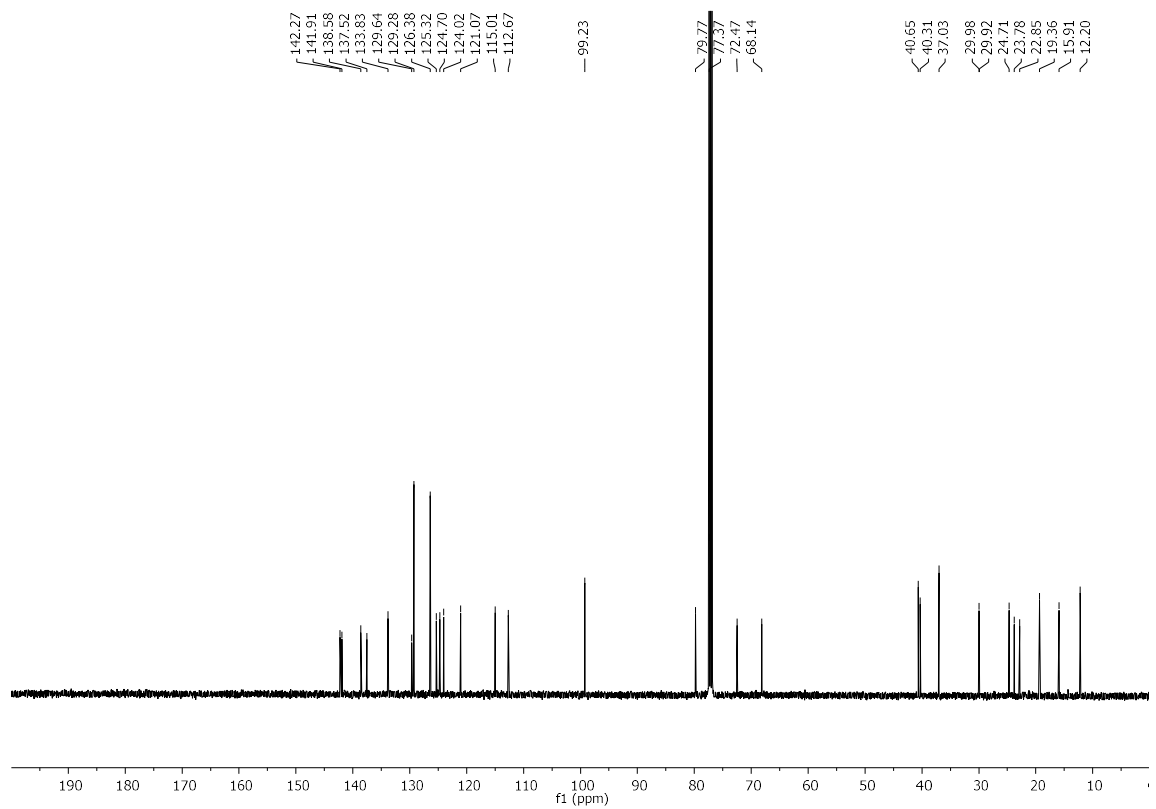

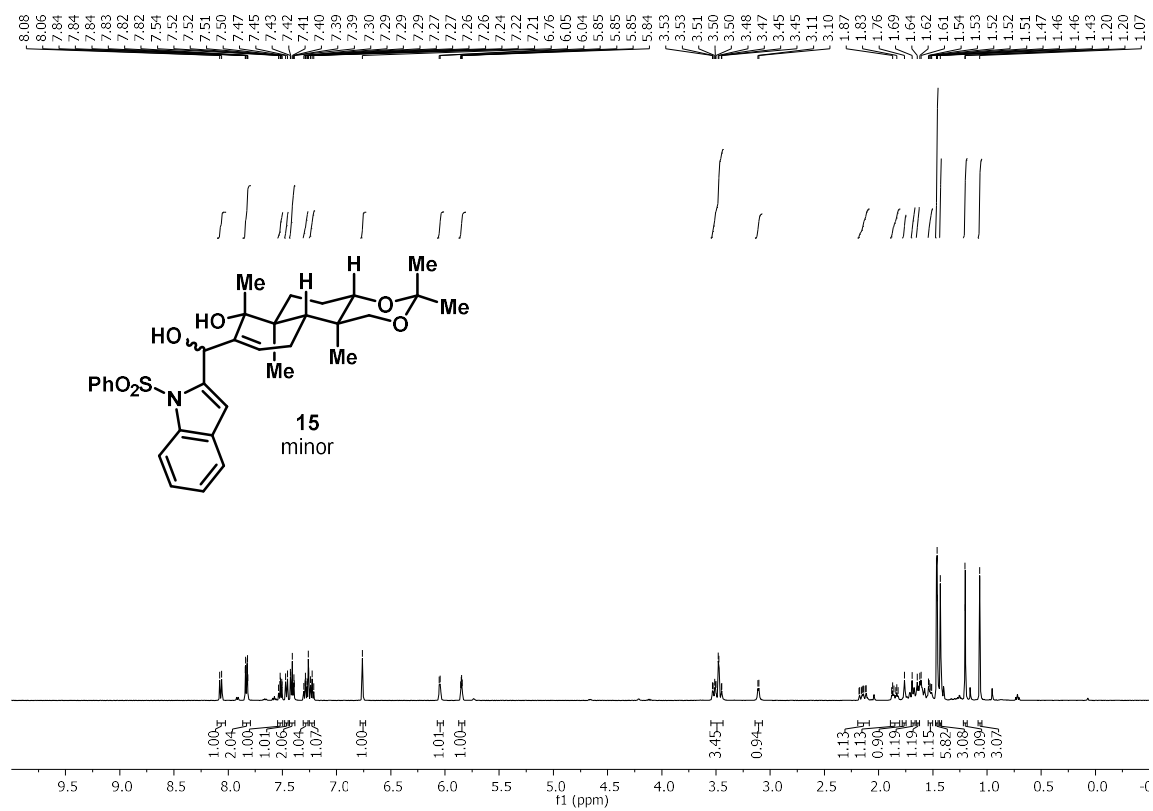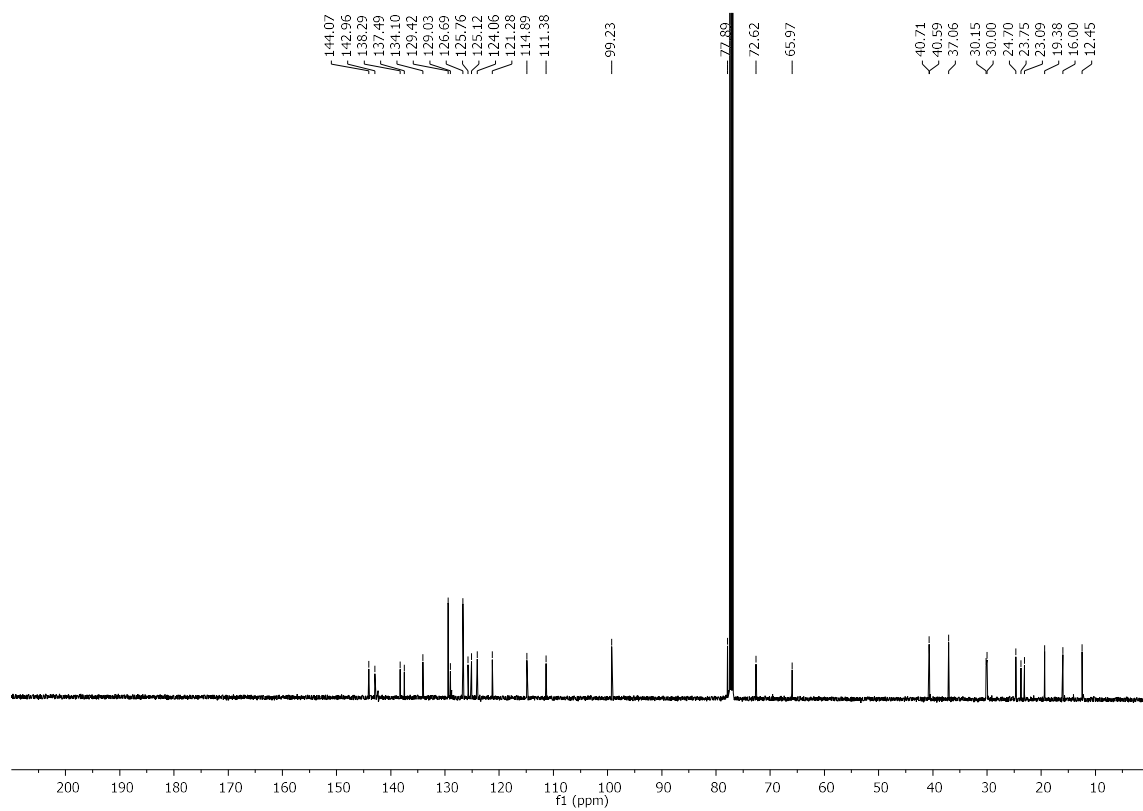

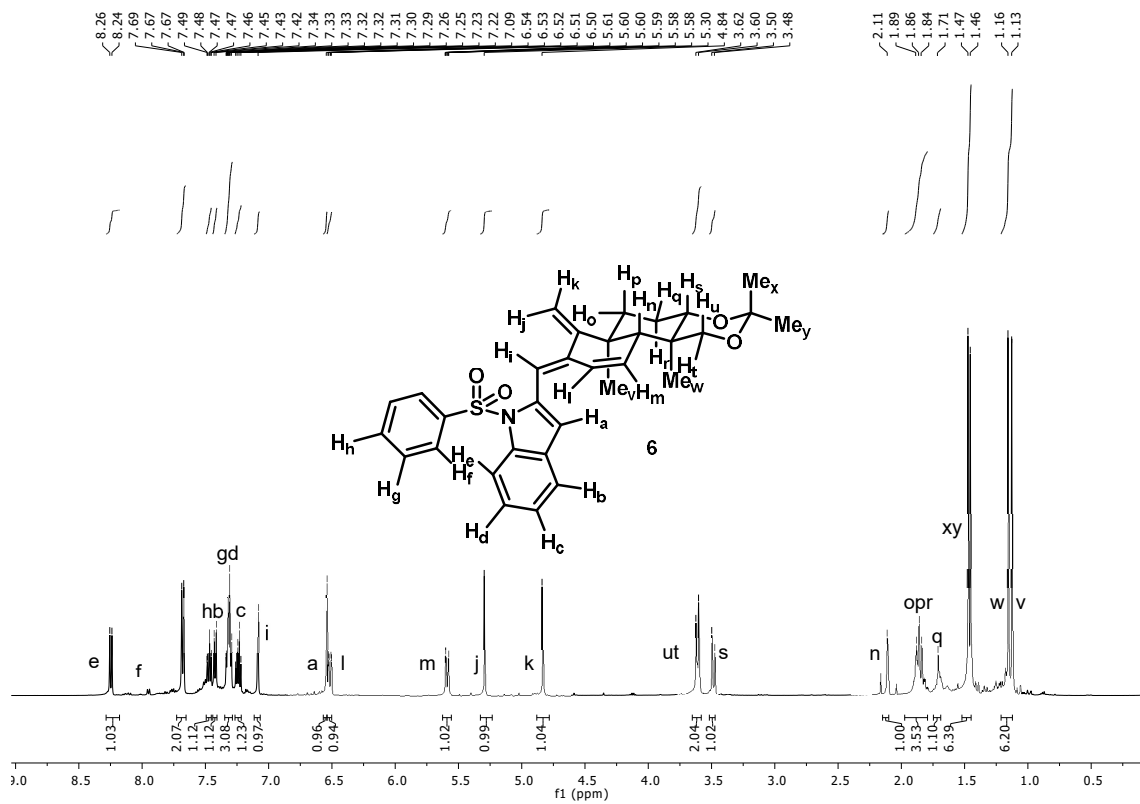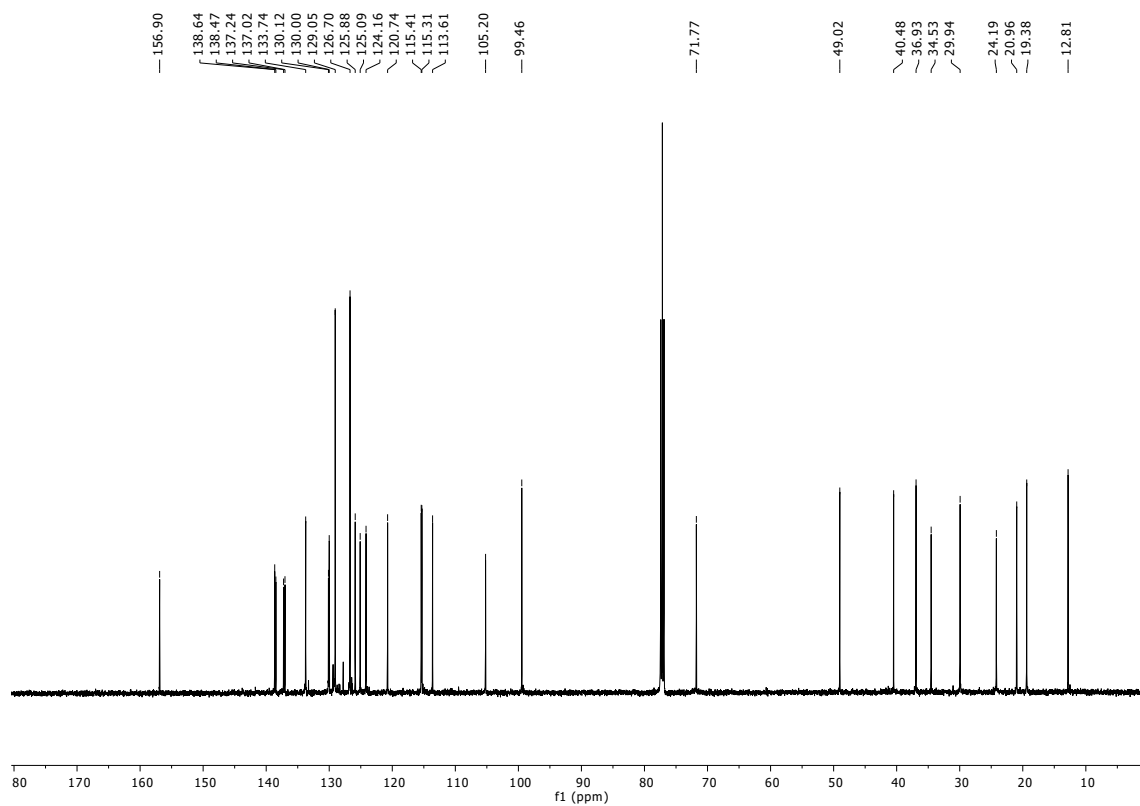

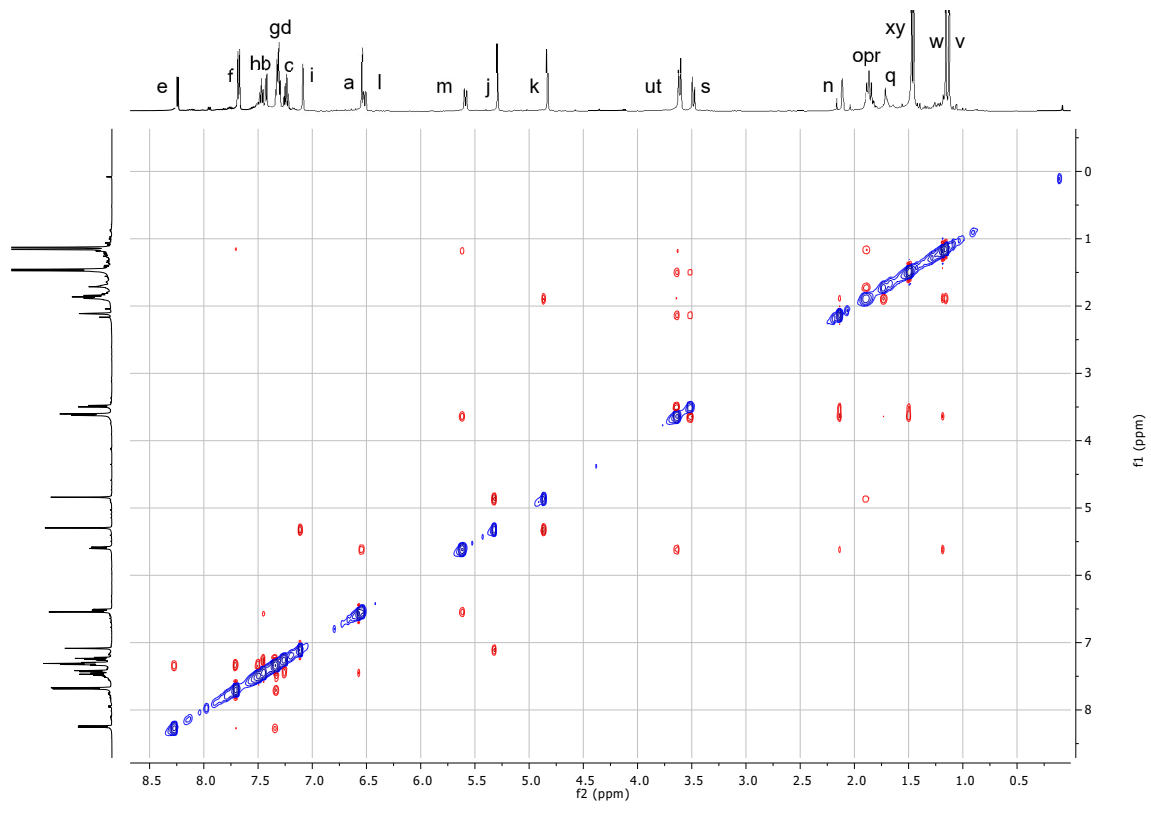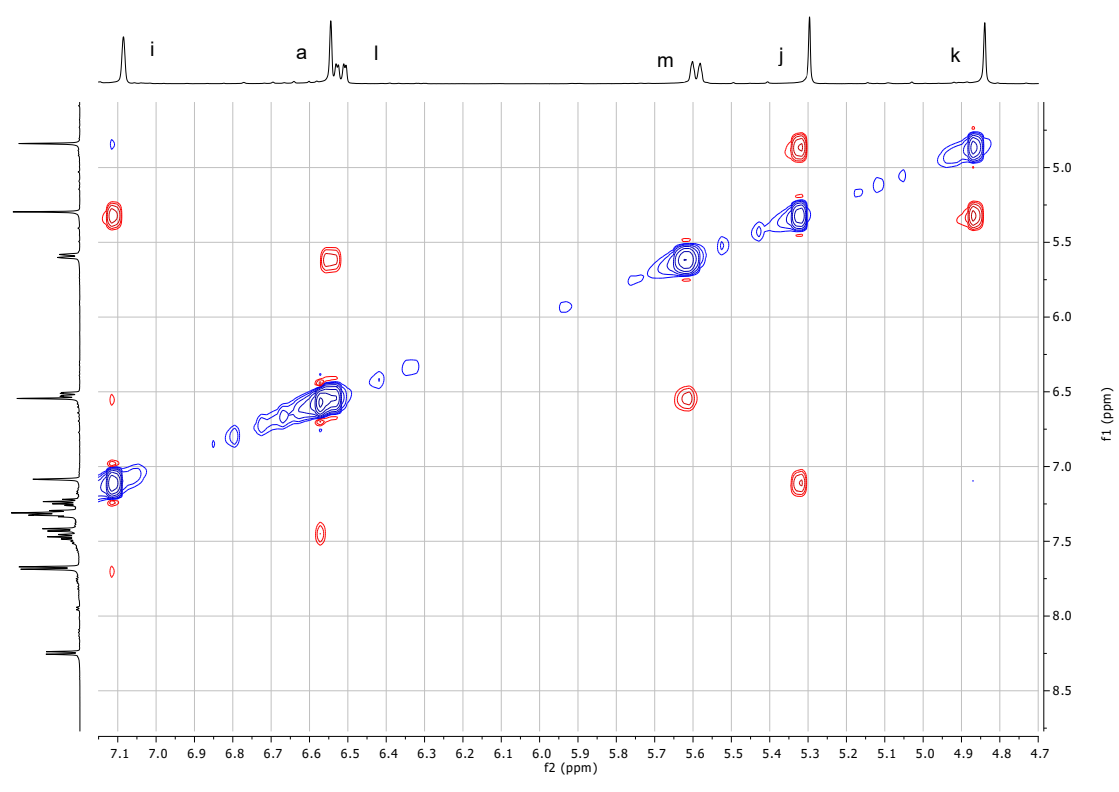

NOESY correlations for compound 6

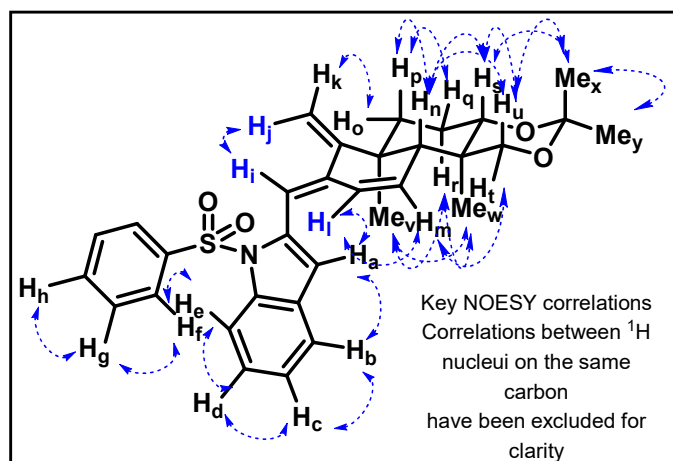

| $^1\text{H}$ signal | NOESY correlation |
|---------------------|-------------------|
| a                   | b, l              |
| b                   | a, c              |
| c                   | b, d              |
| d                   | c, e              |
| e                   | d                 |
| f                   | g                 |
| g                   | f, h              |
| h                   | g                 |
| i                   | j                 |
| j                   | i, k              |
| k                   | j, o              |
| l                   | a, m              |
| m                   | l, w, t           |
| n                   | p, s, u           |
| o                   | k, p, q, r        |
| p                   | n, o, q, s        |
| q                   | o, p, r           |
| r                   | o, q, v, w        |
| s                   | p, n, x           |
| t                   | m, u, w           |
| u                   | n, s, t, x        |
| v                   | r, w              |
| w                   | m, r, t, v        |
| x                   | s, u, y           |
| y                   | x                 |



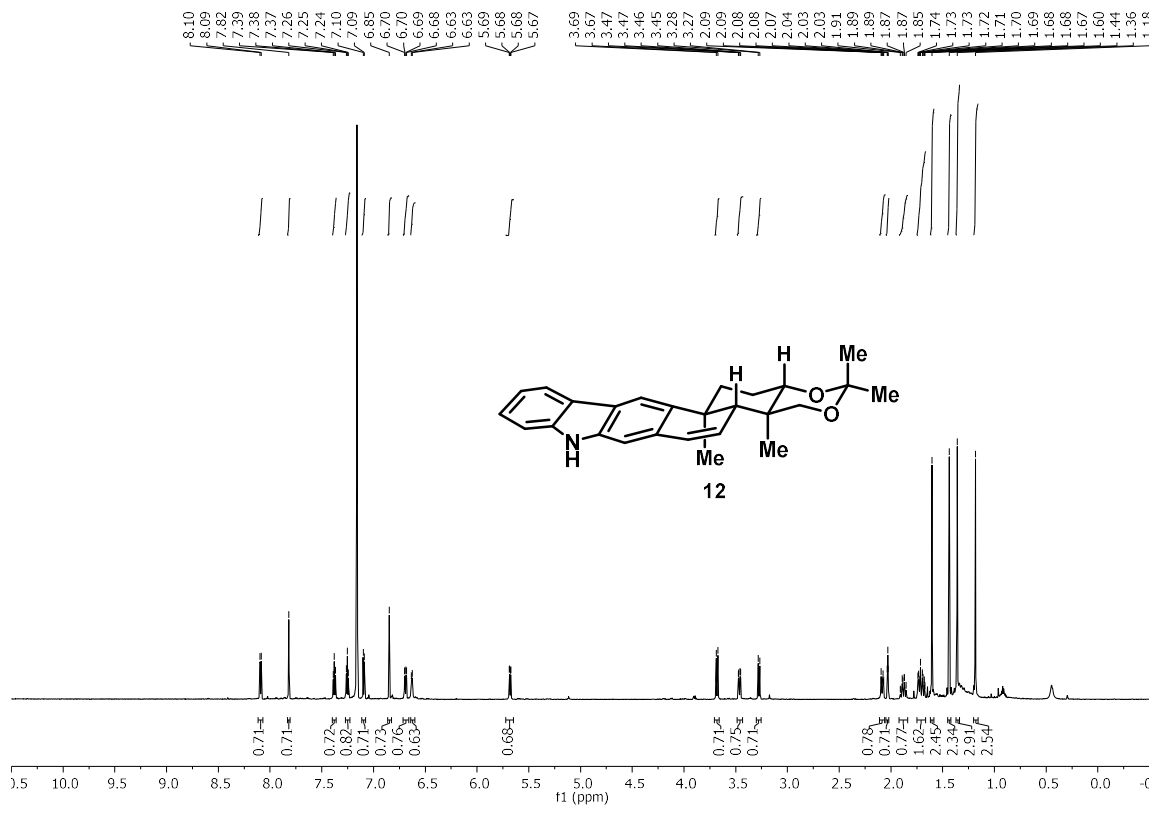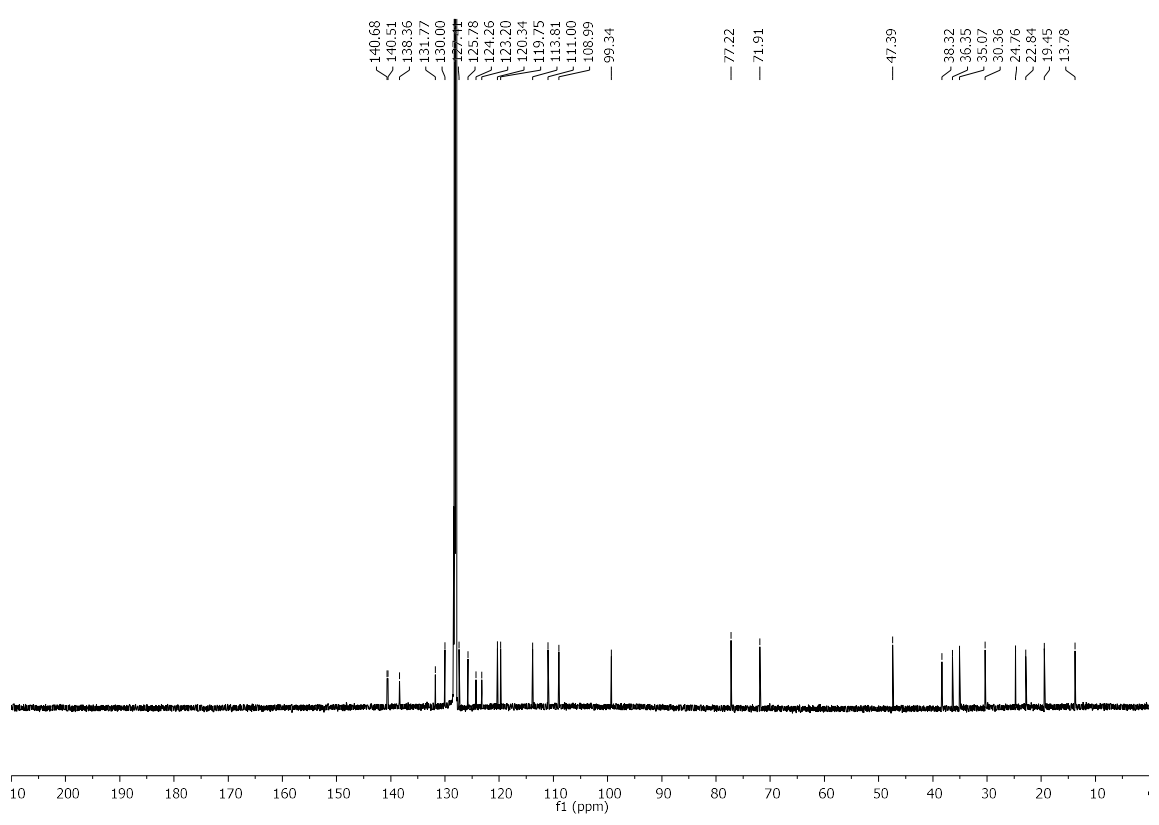

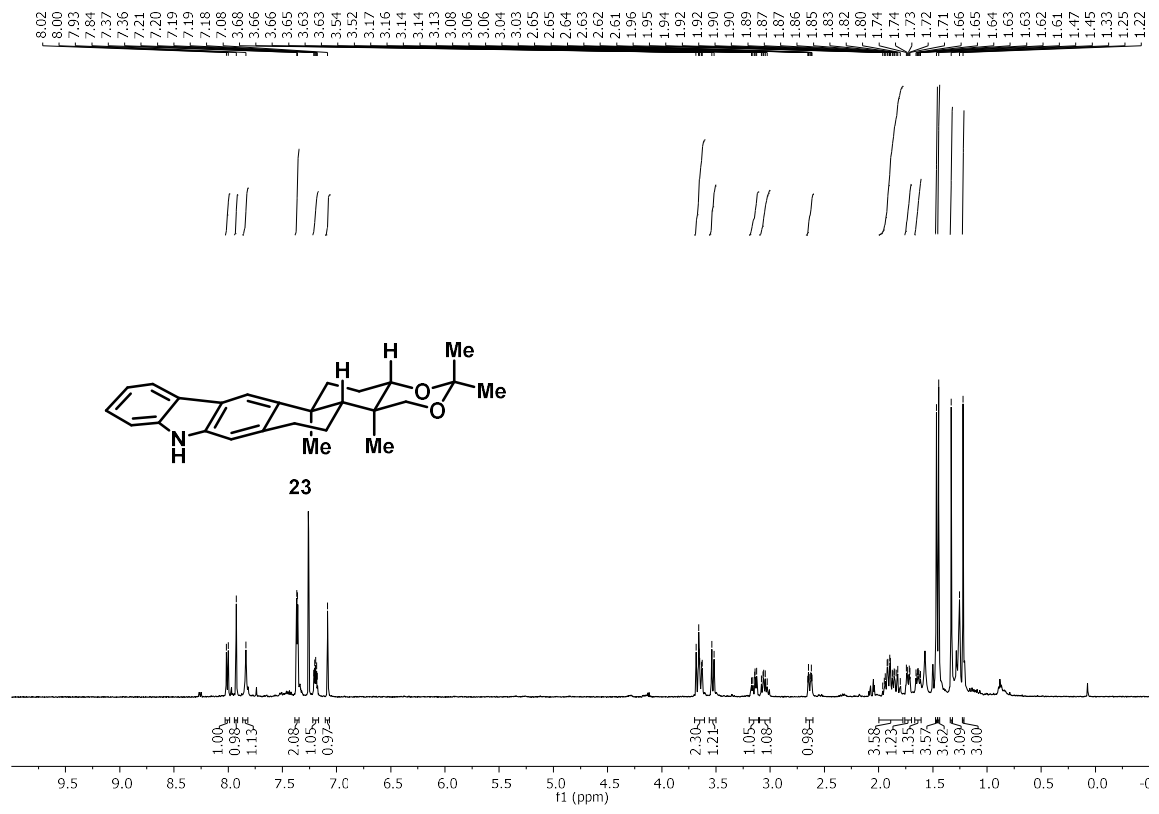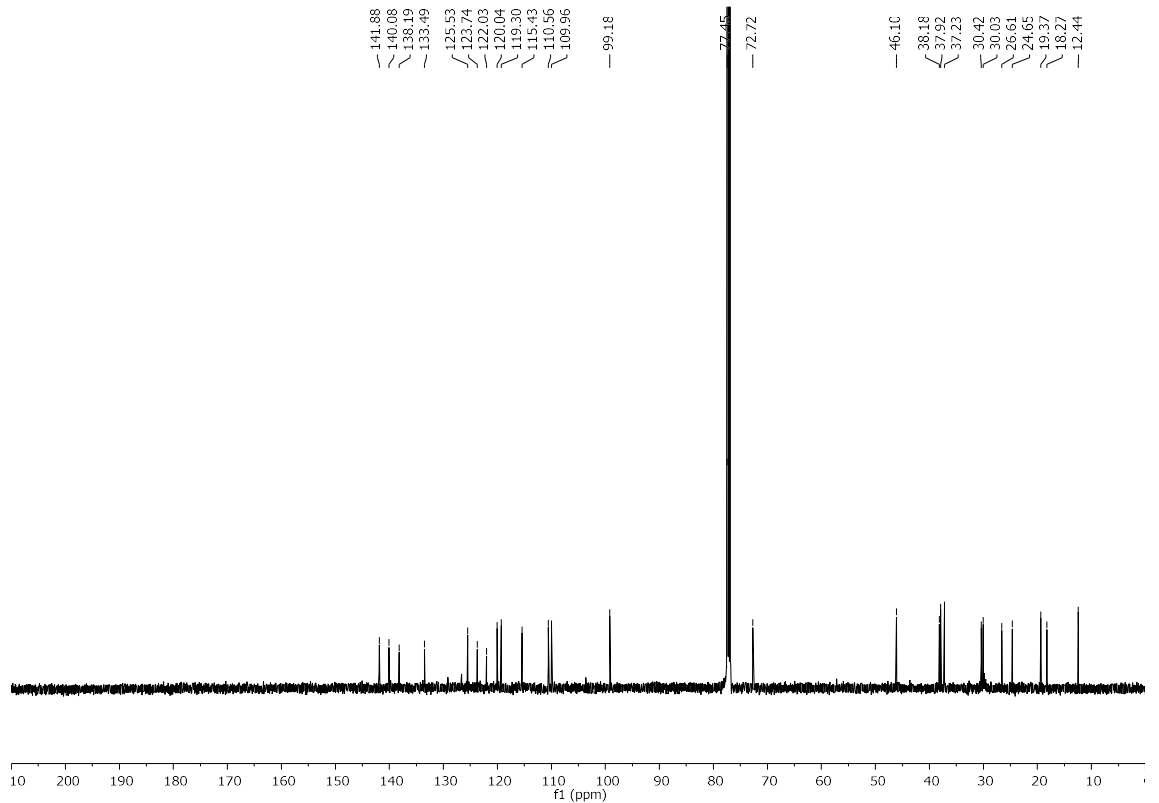

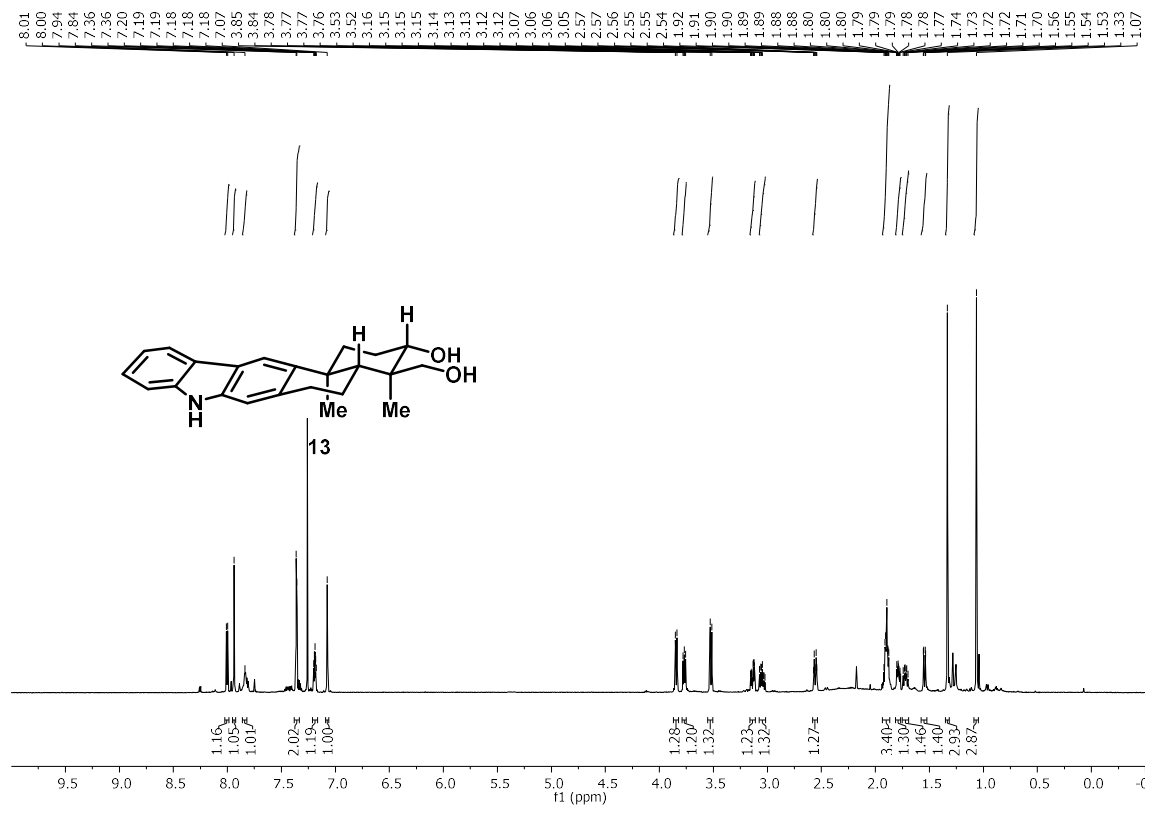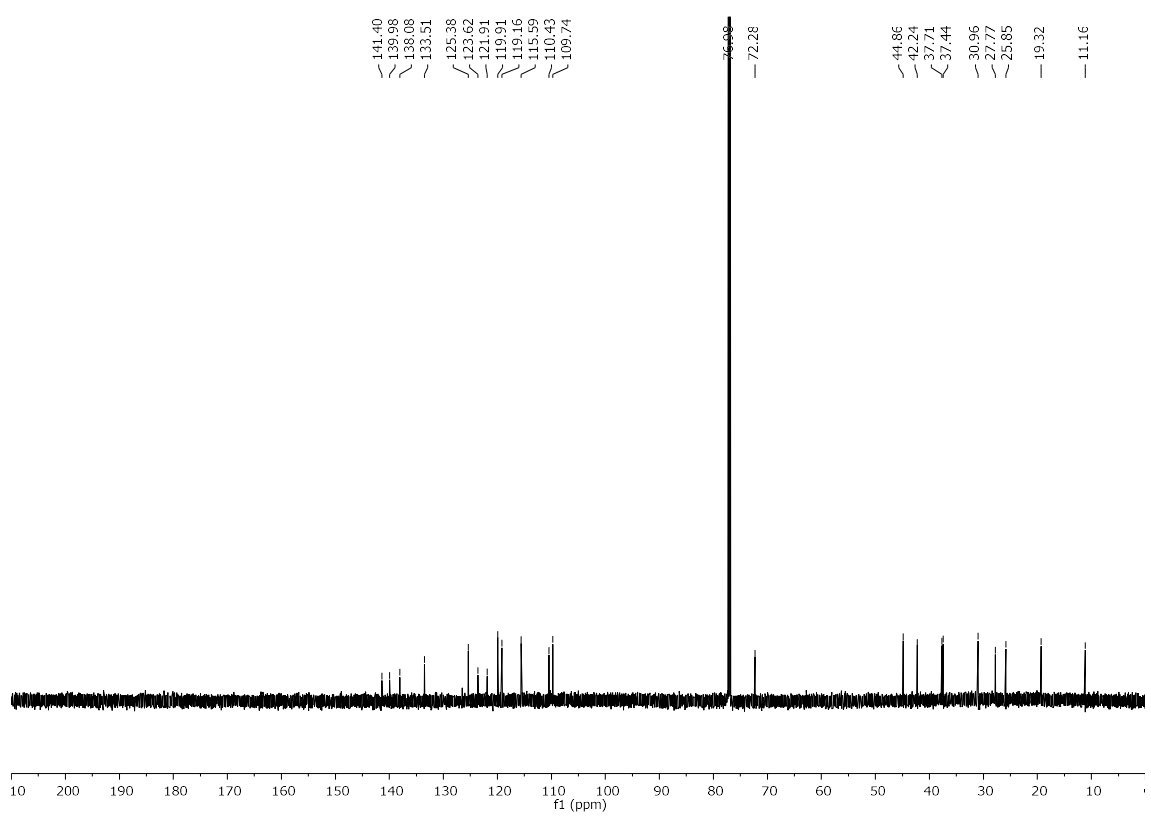

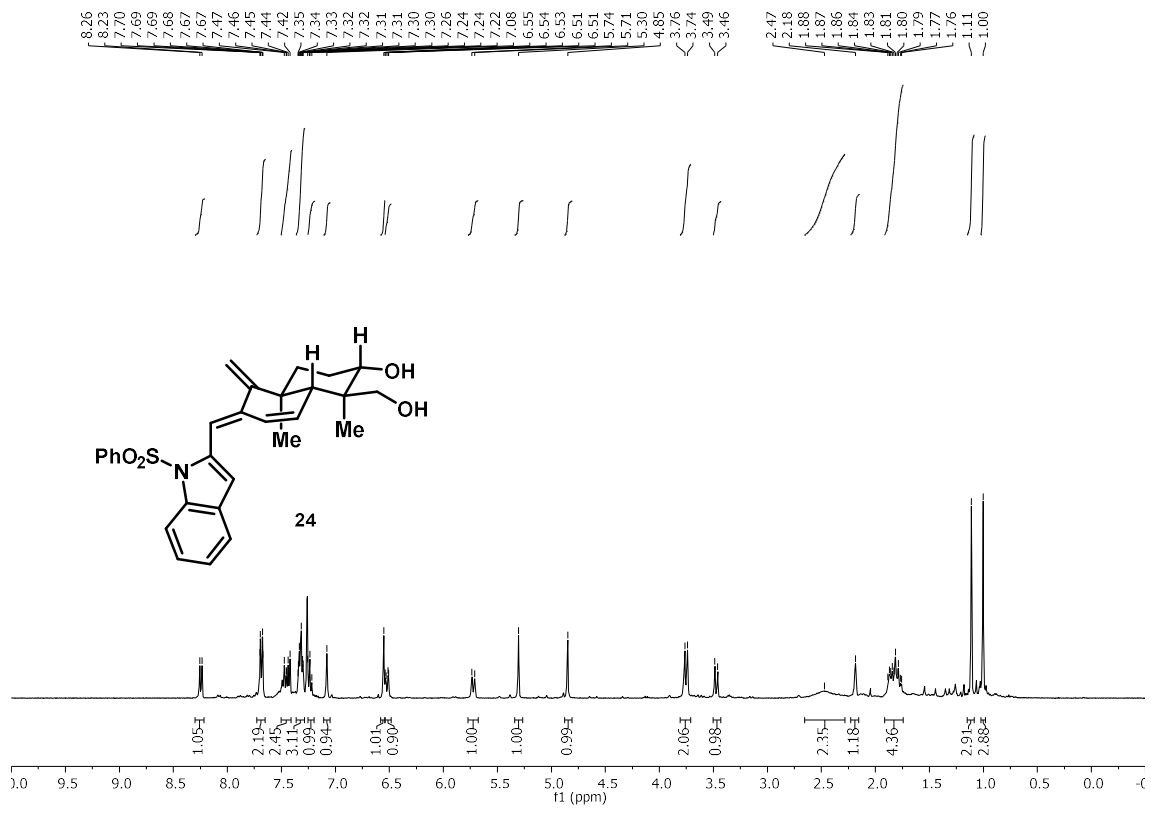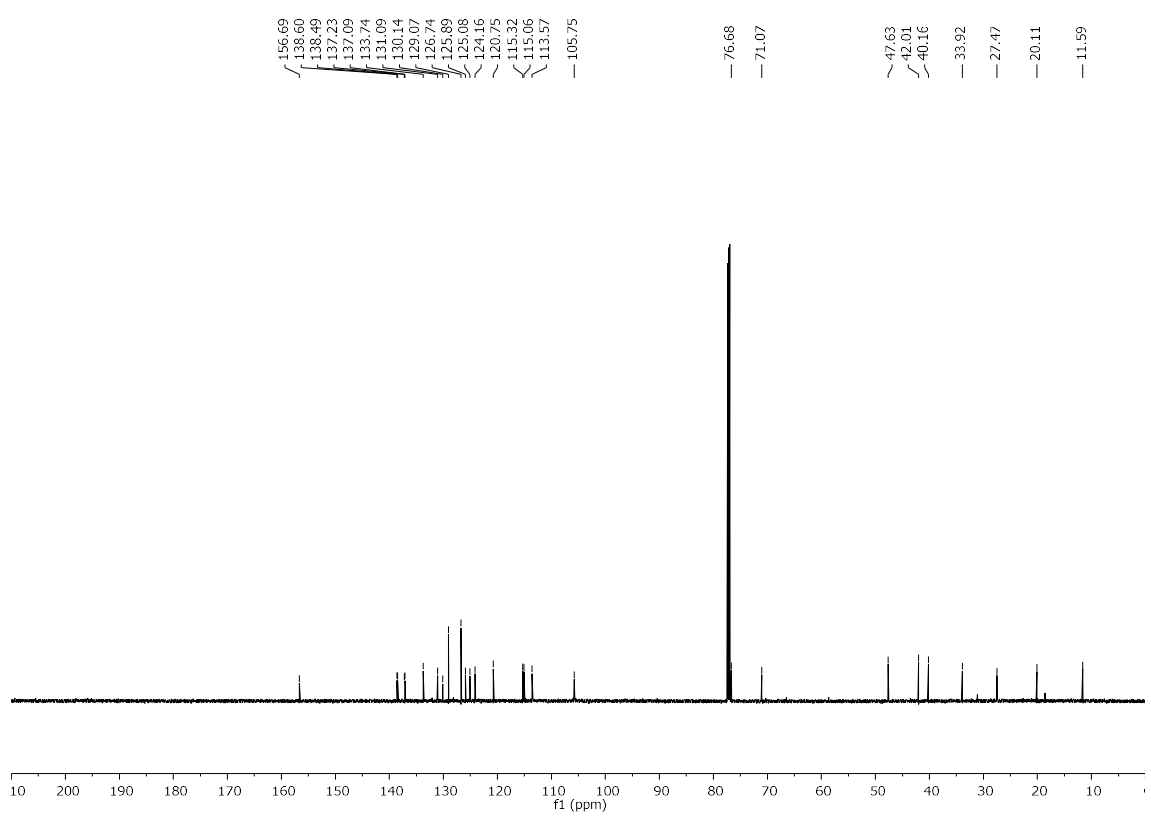

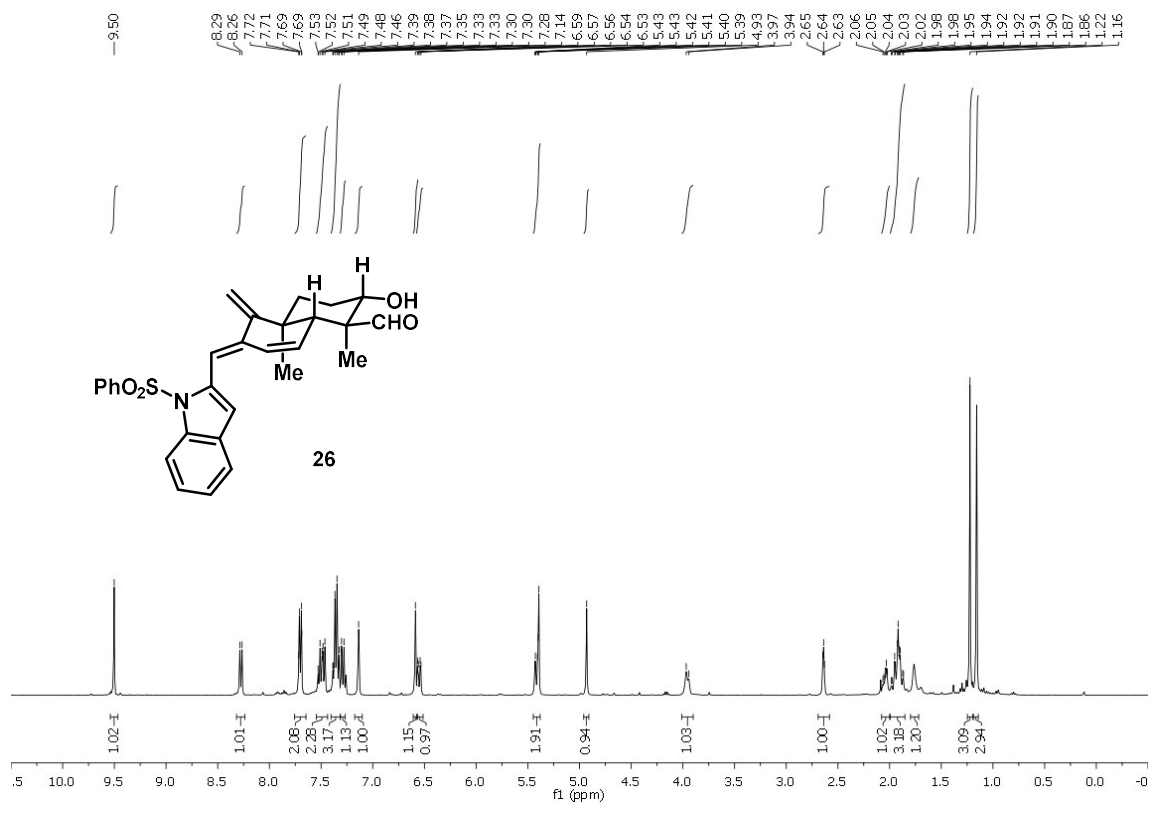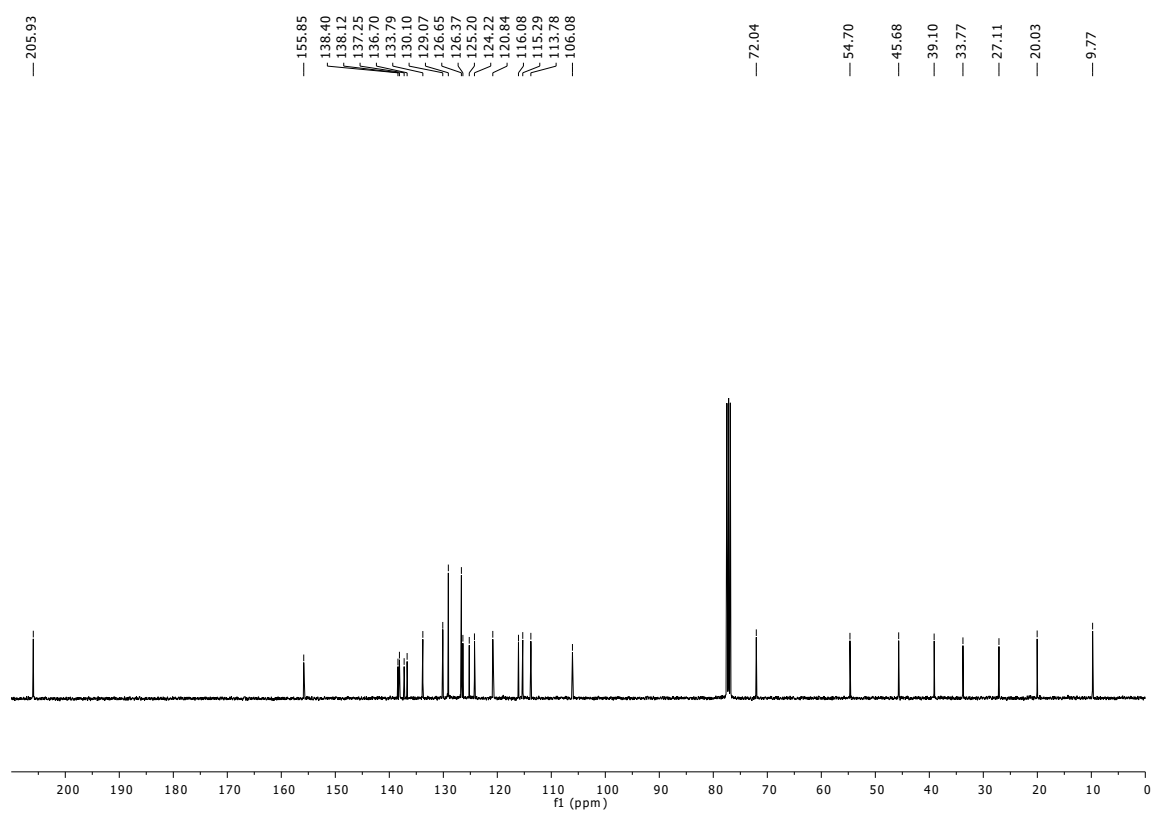

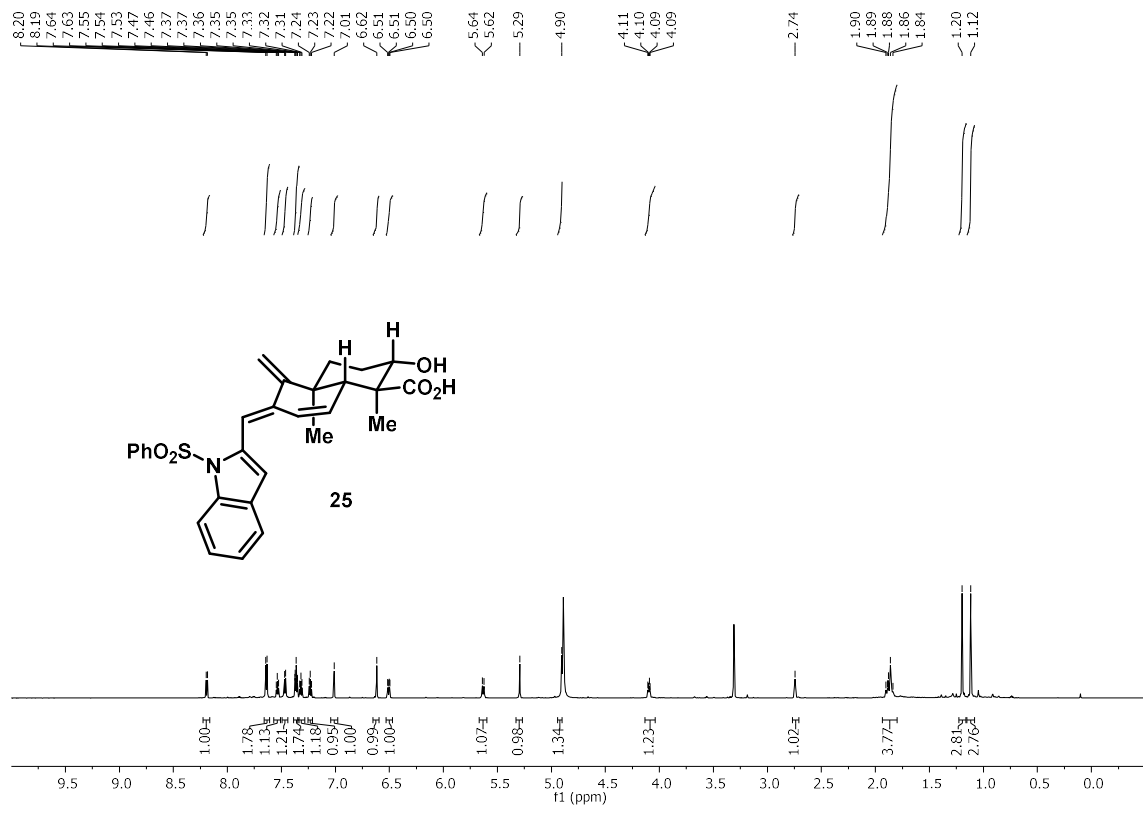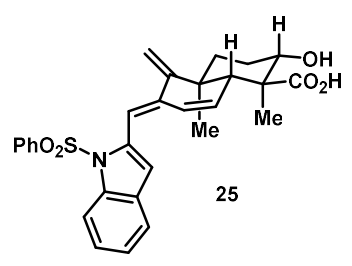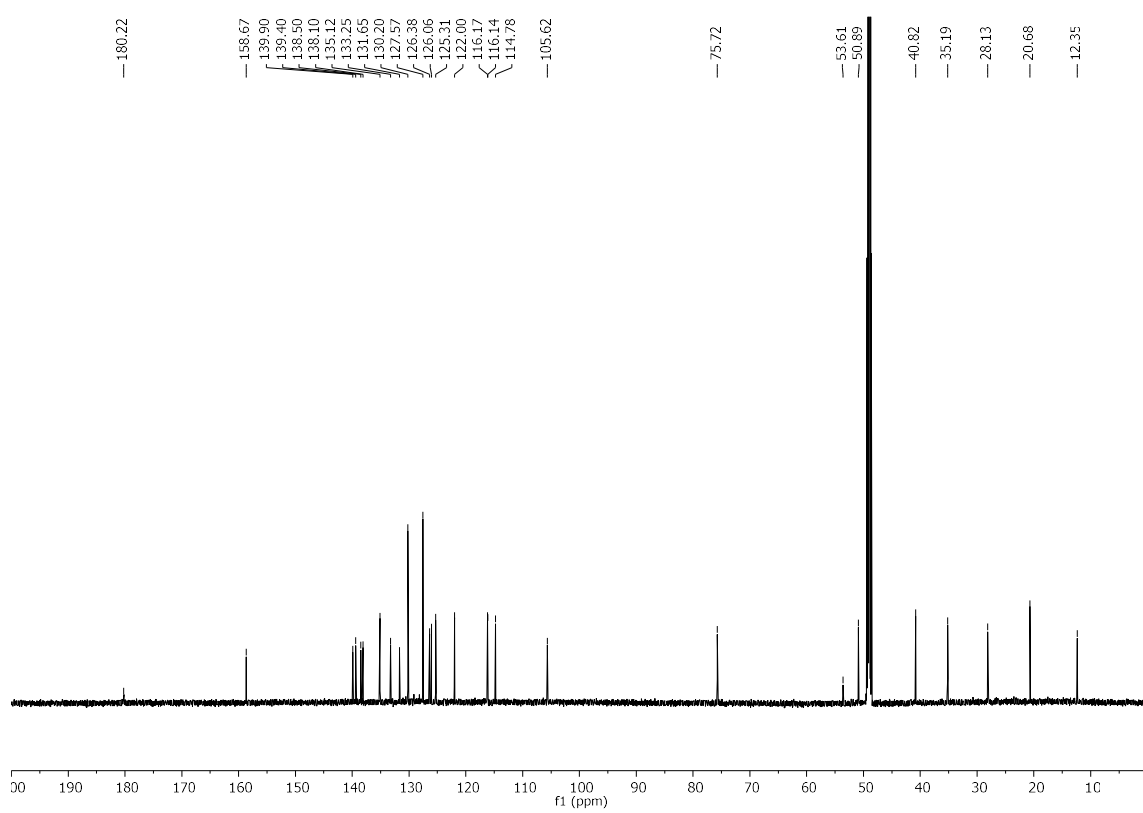

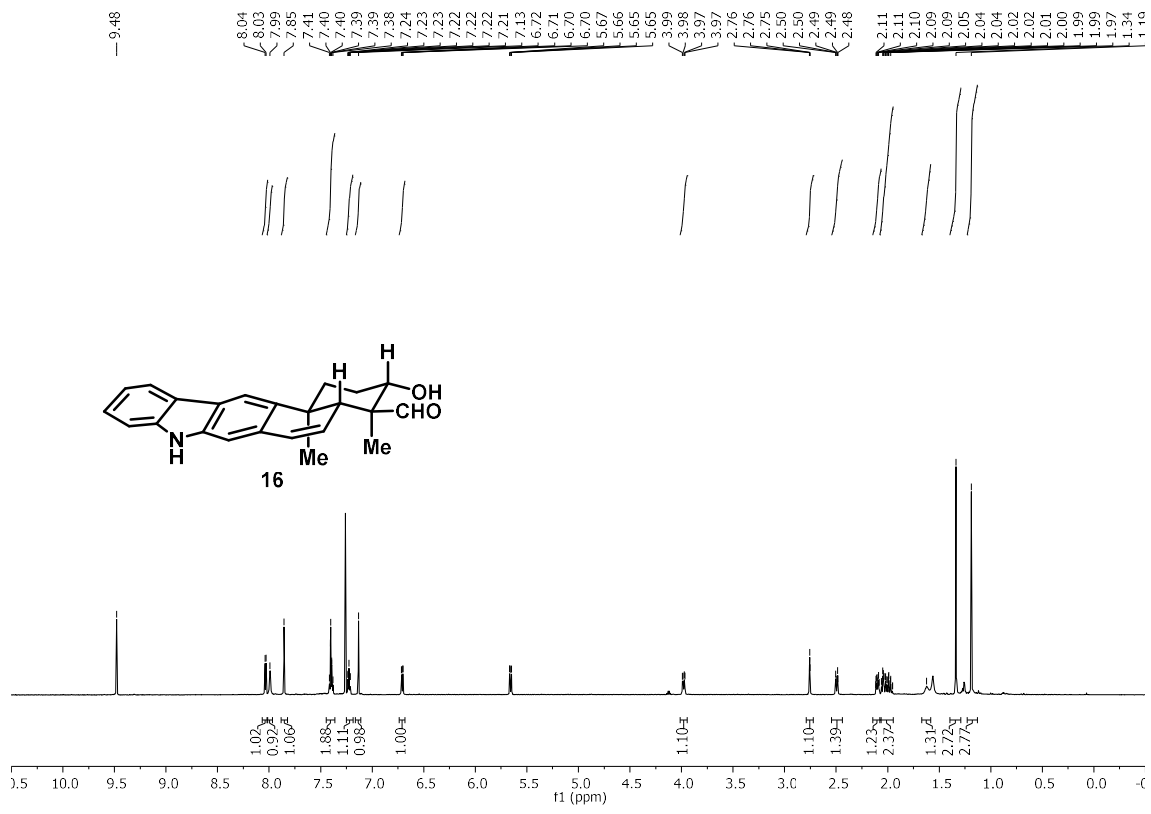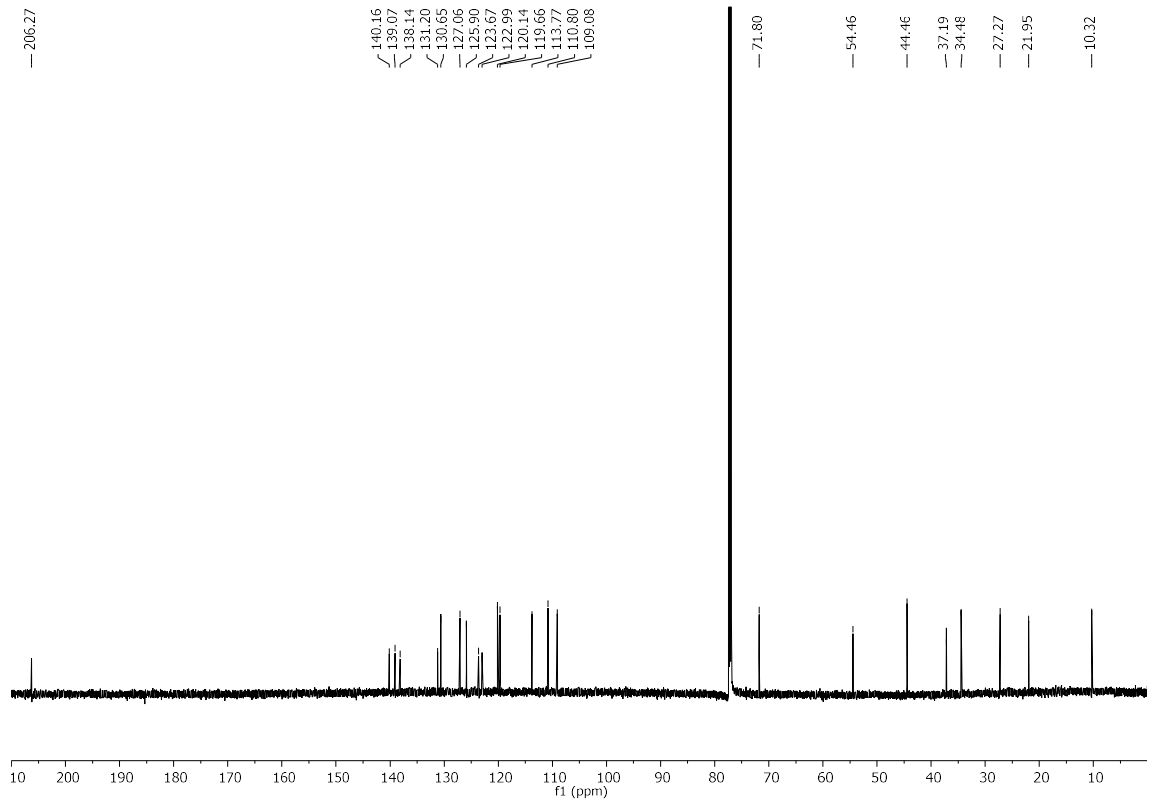

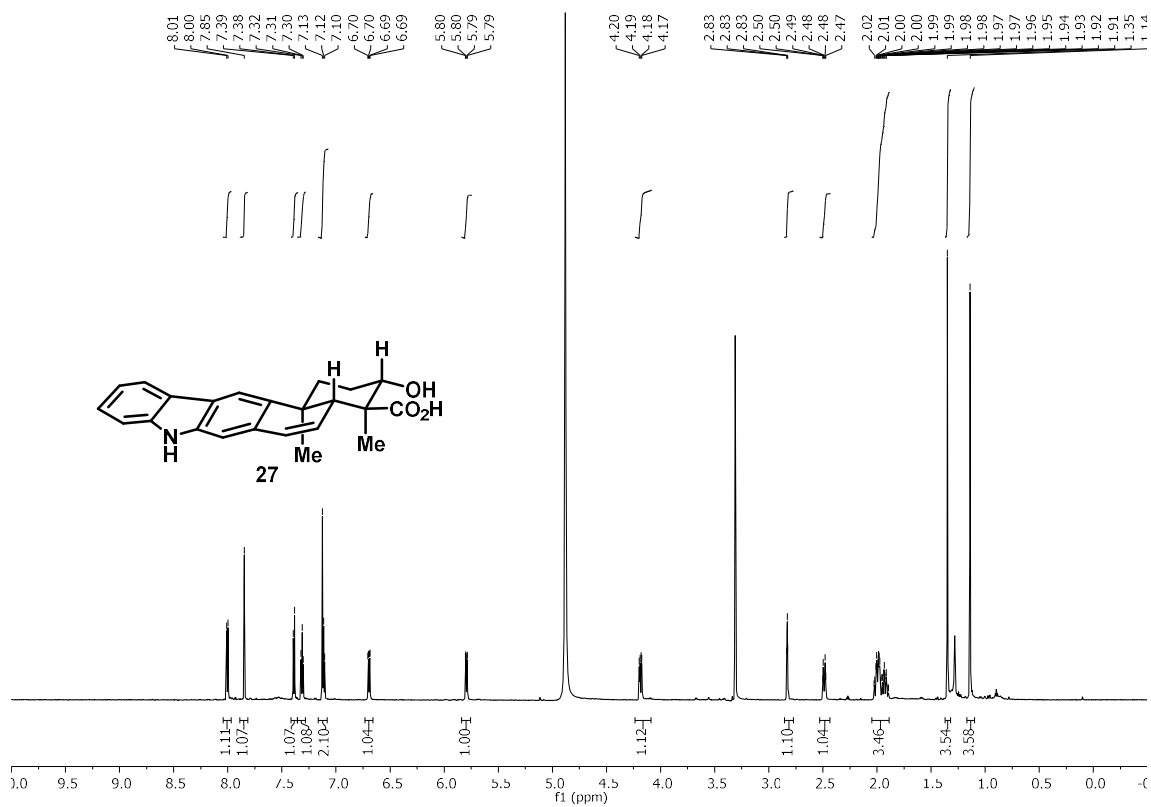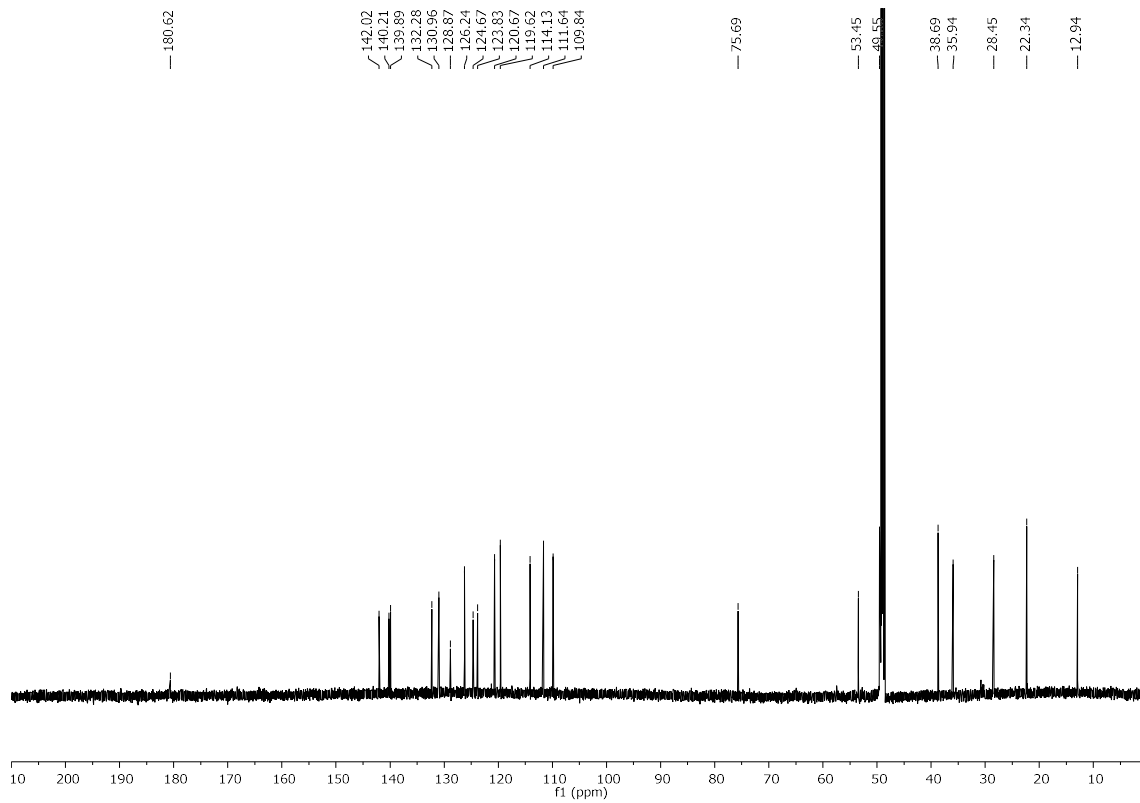



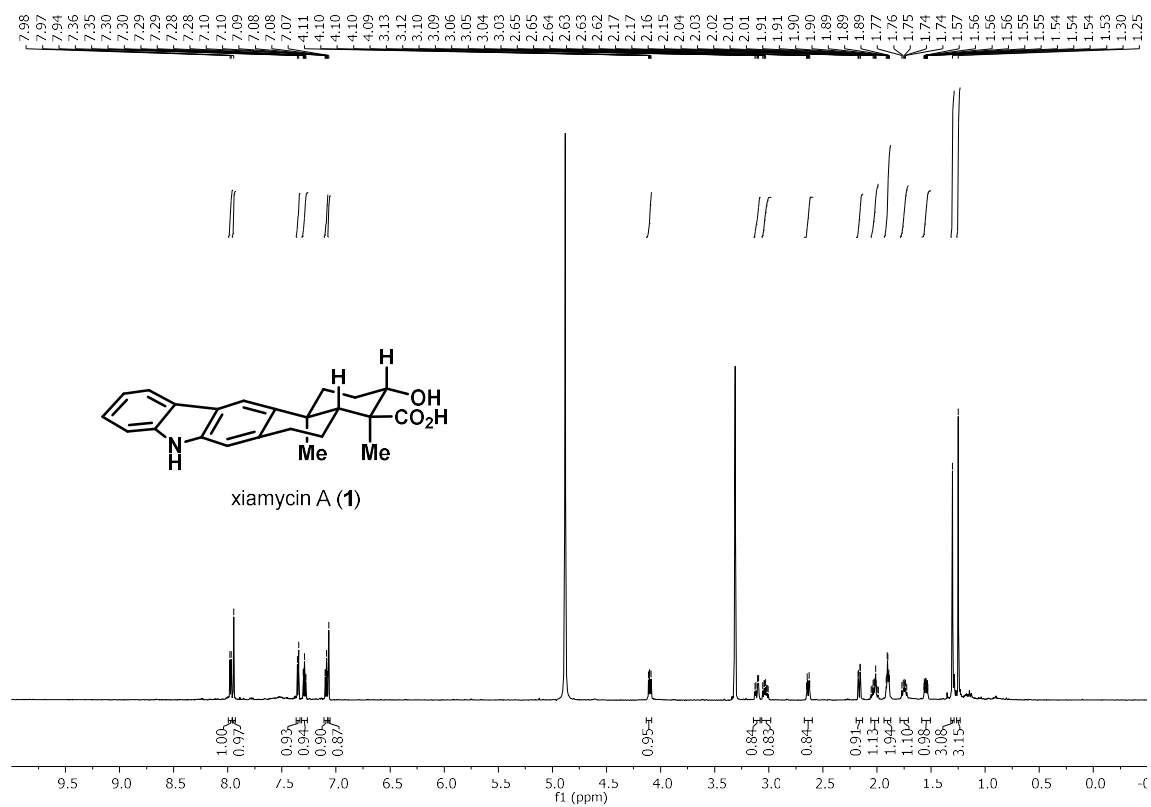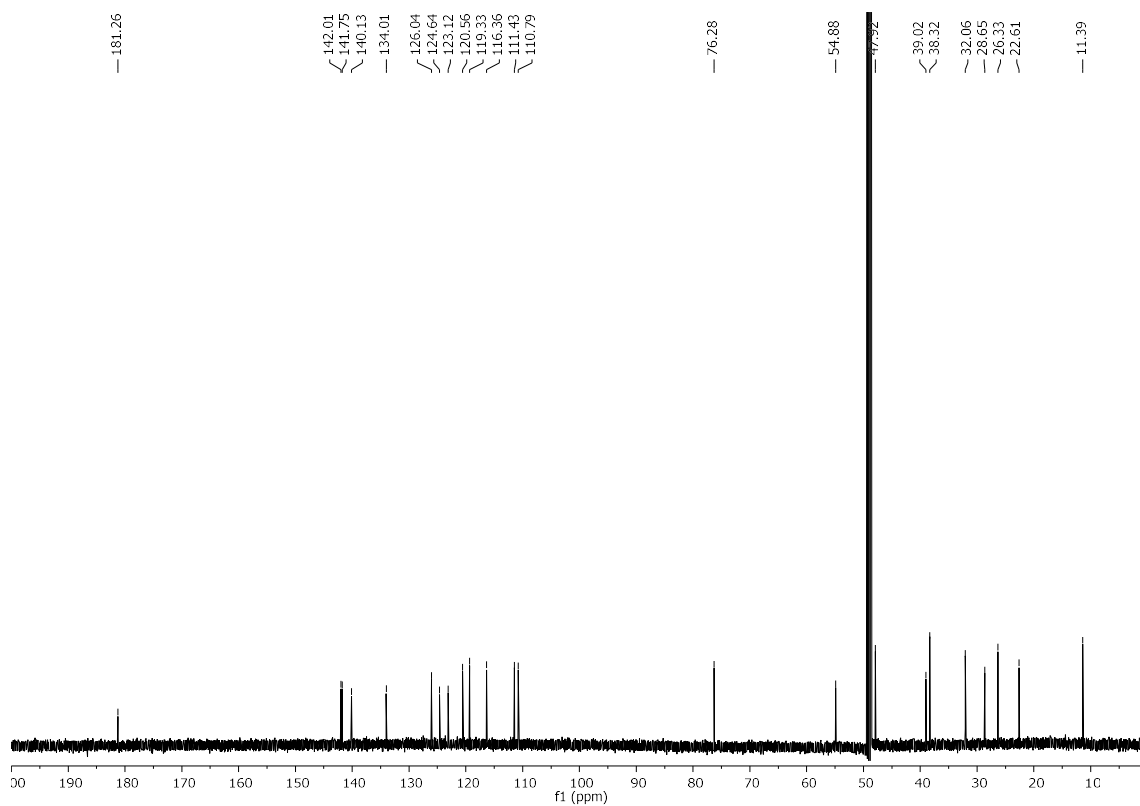

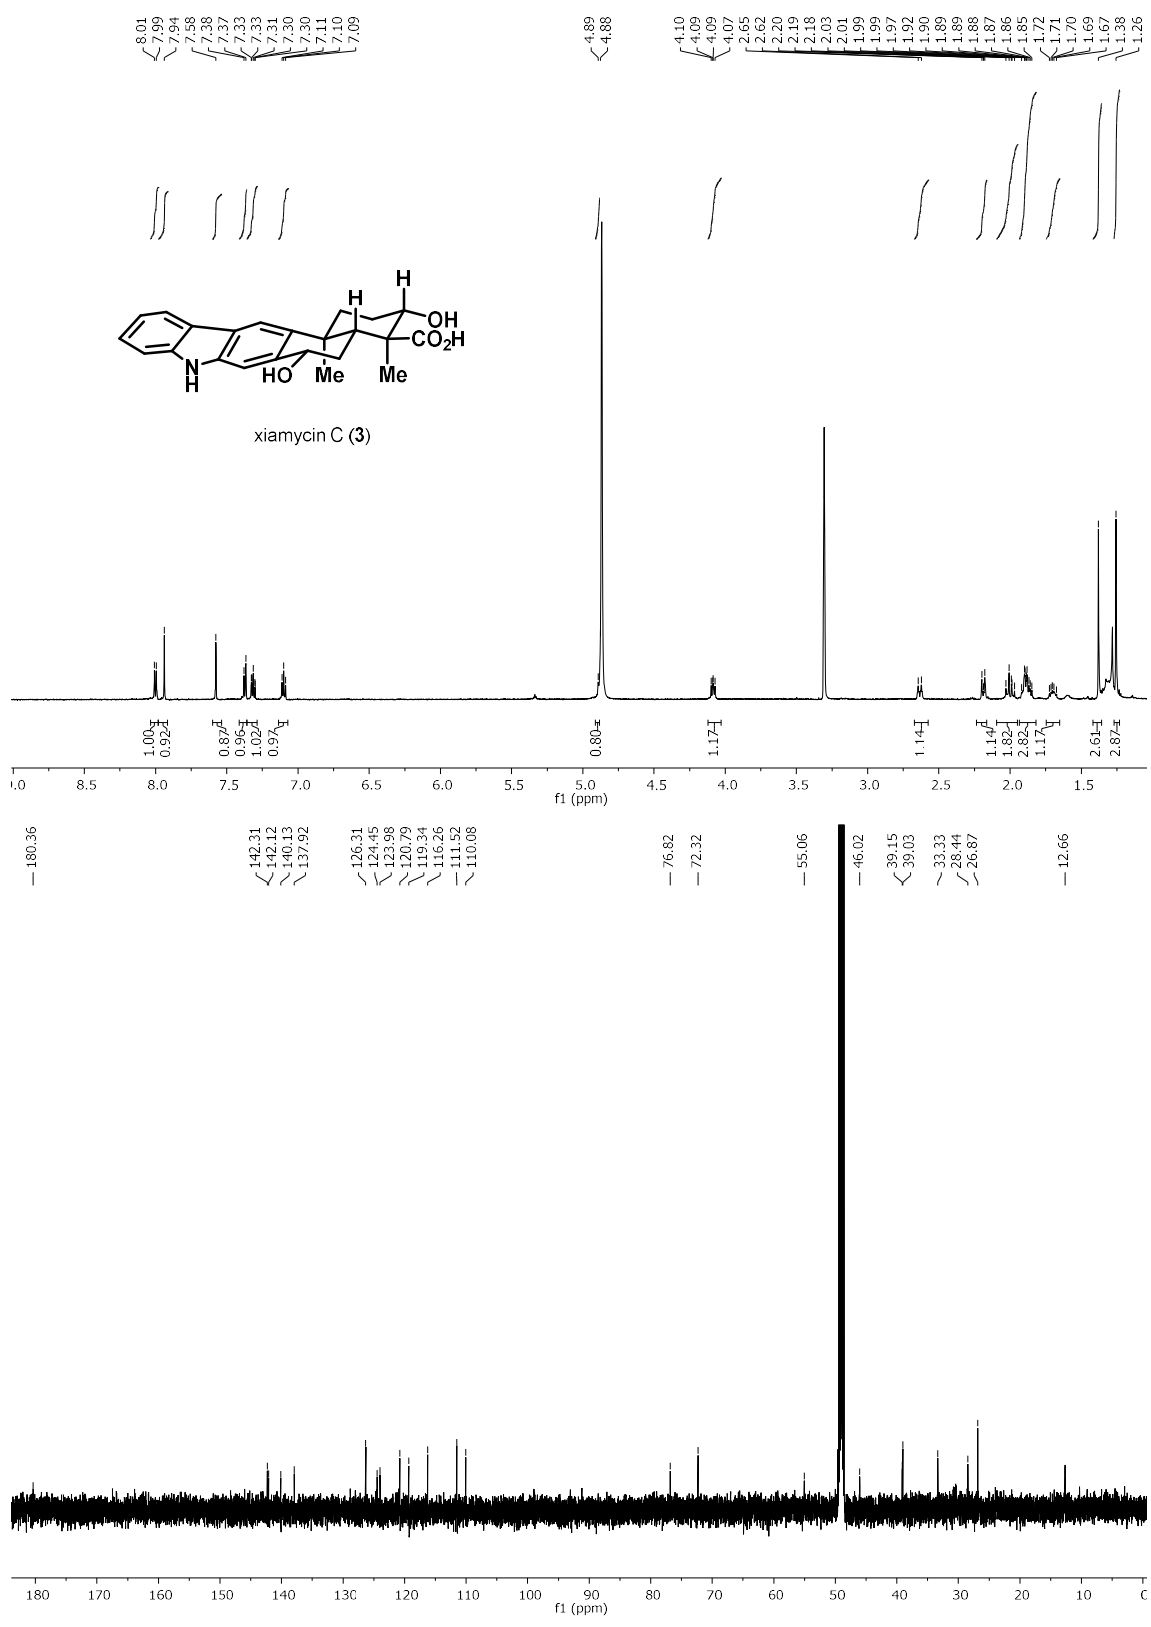

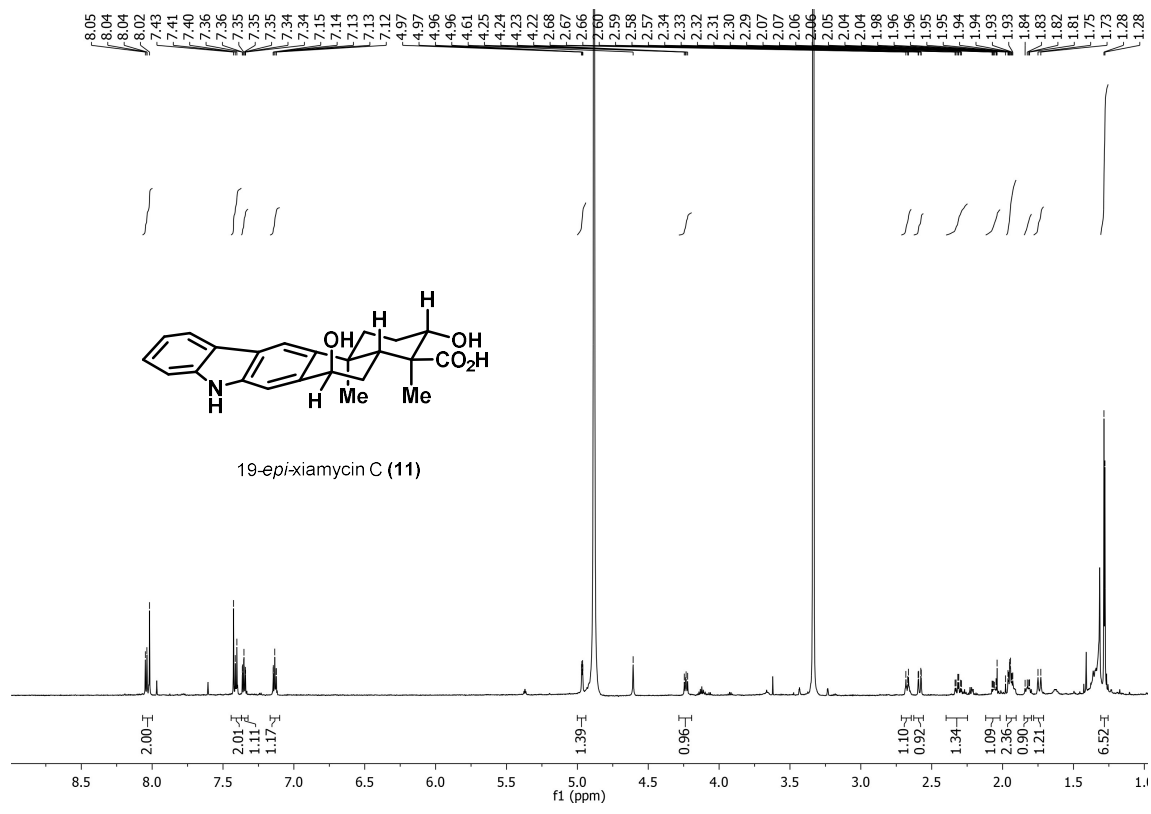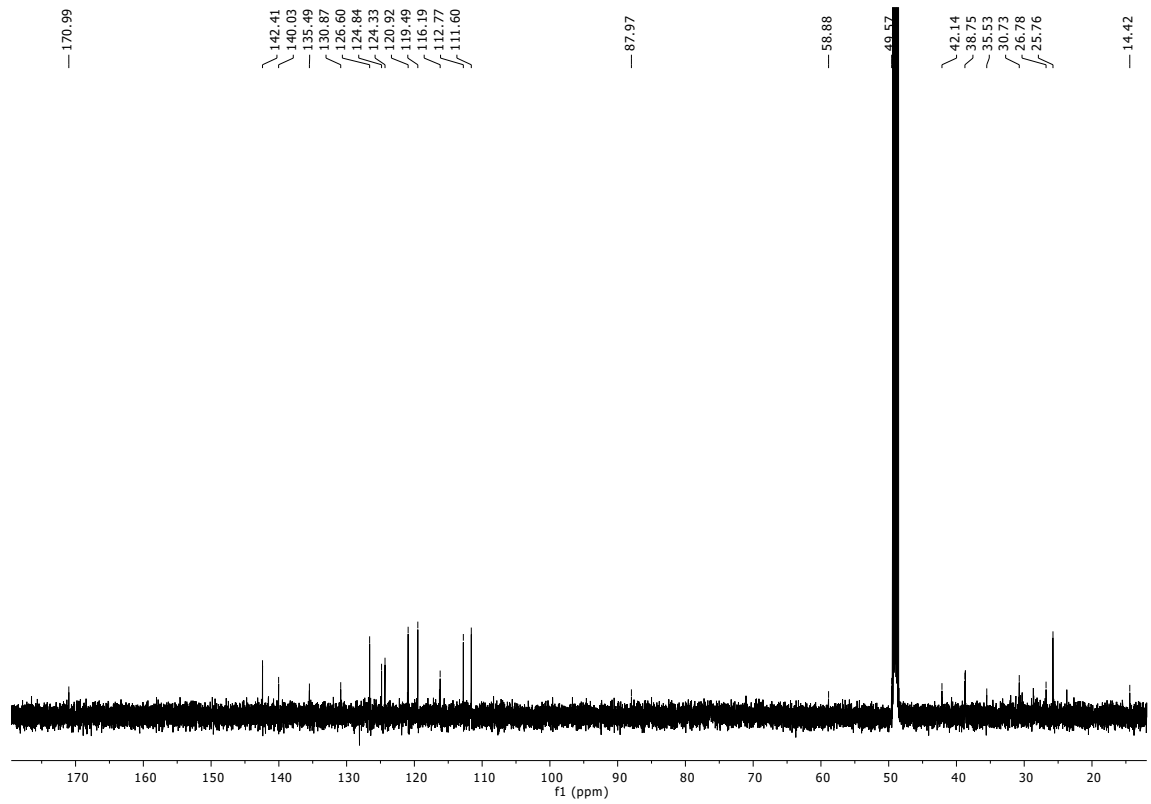

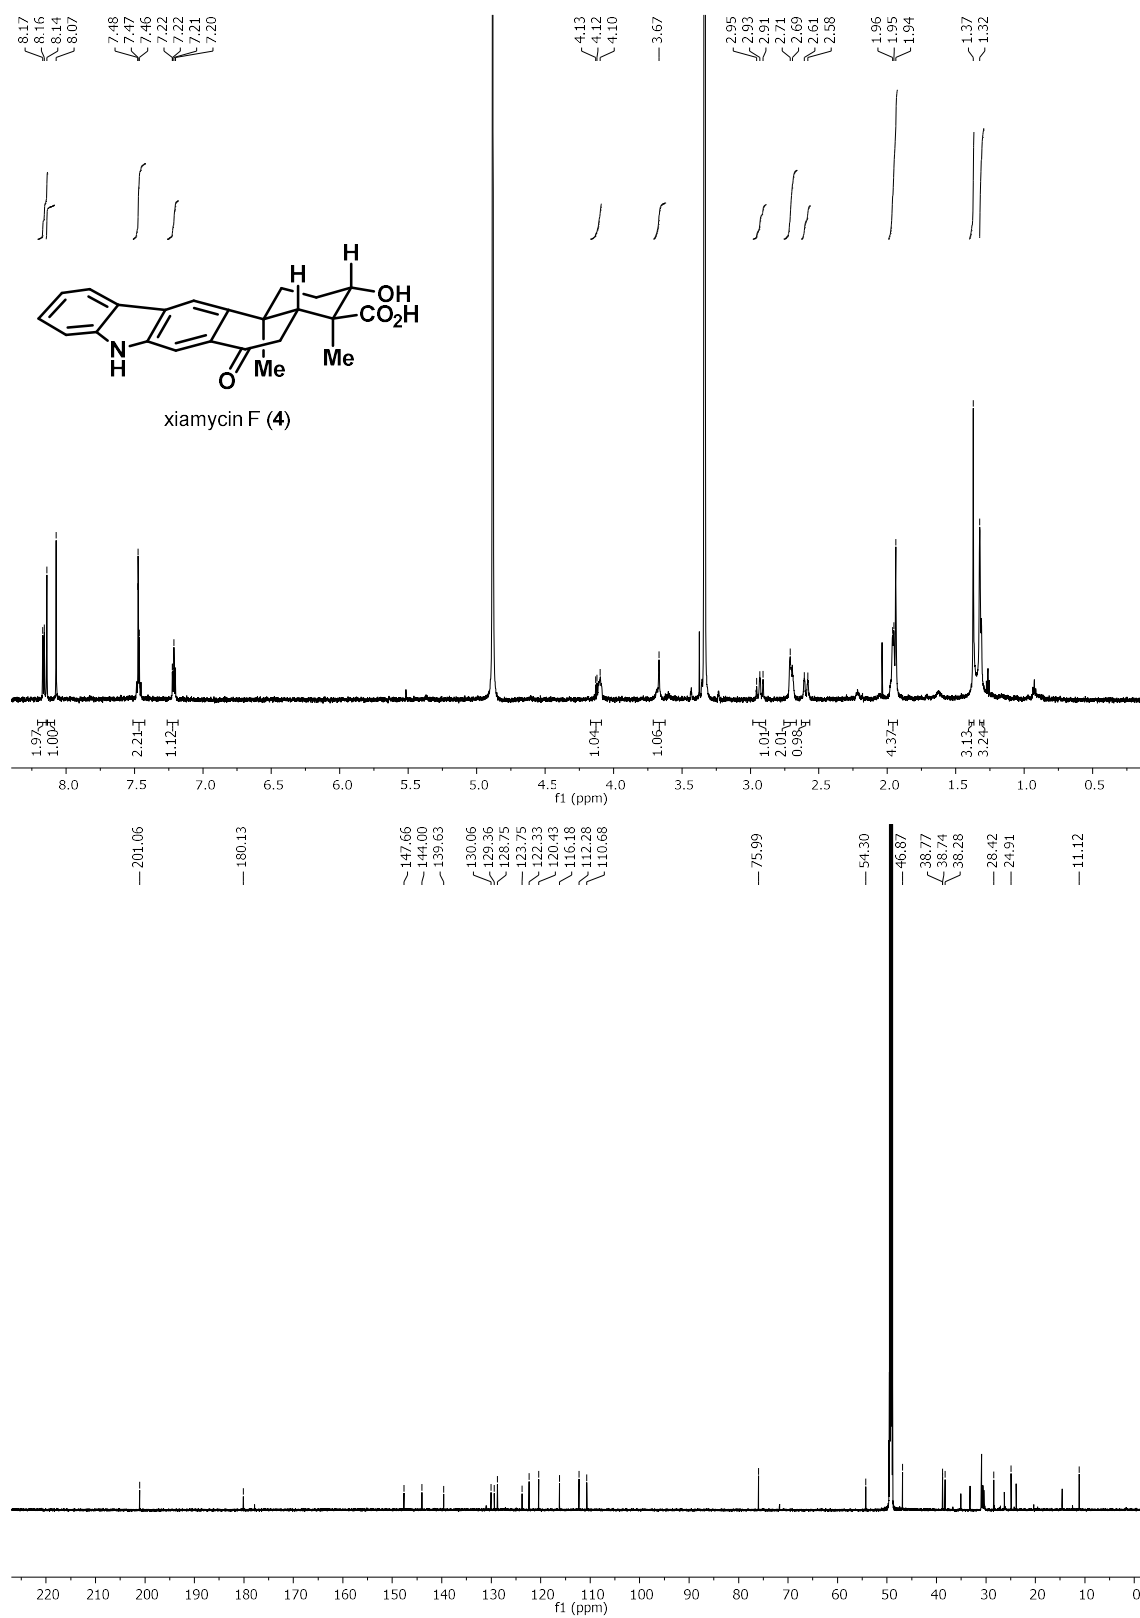

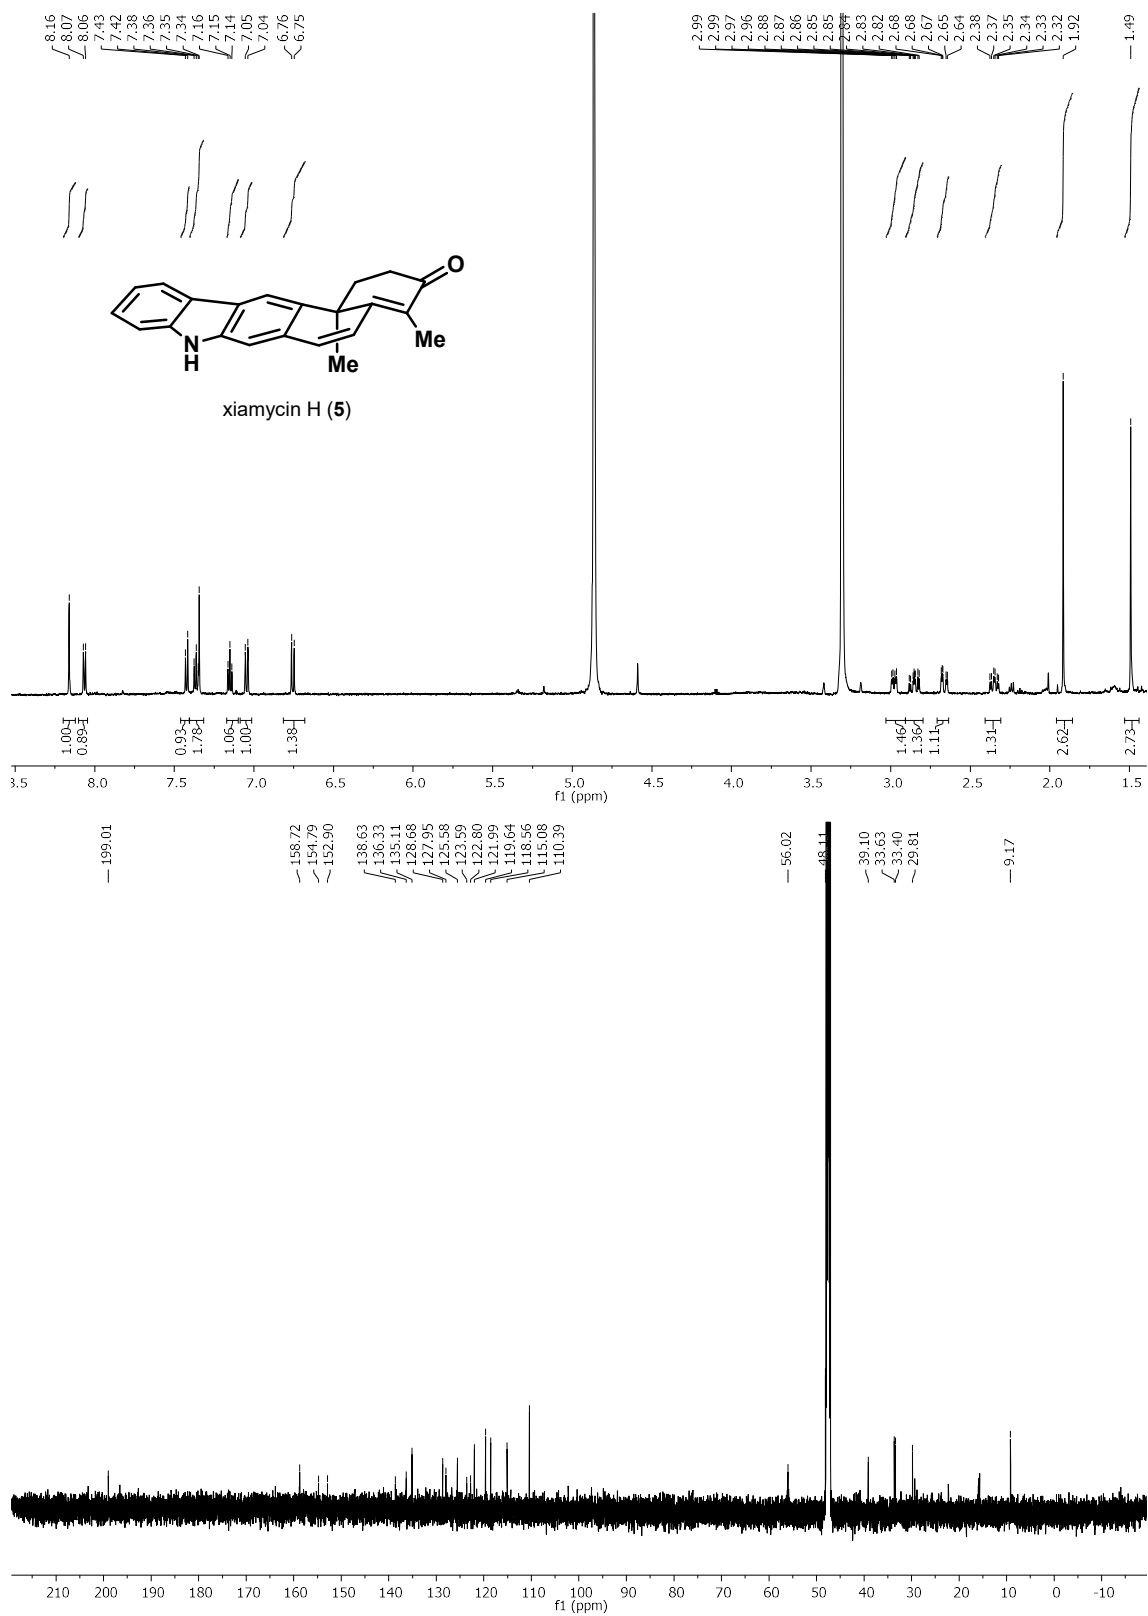

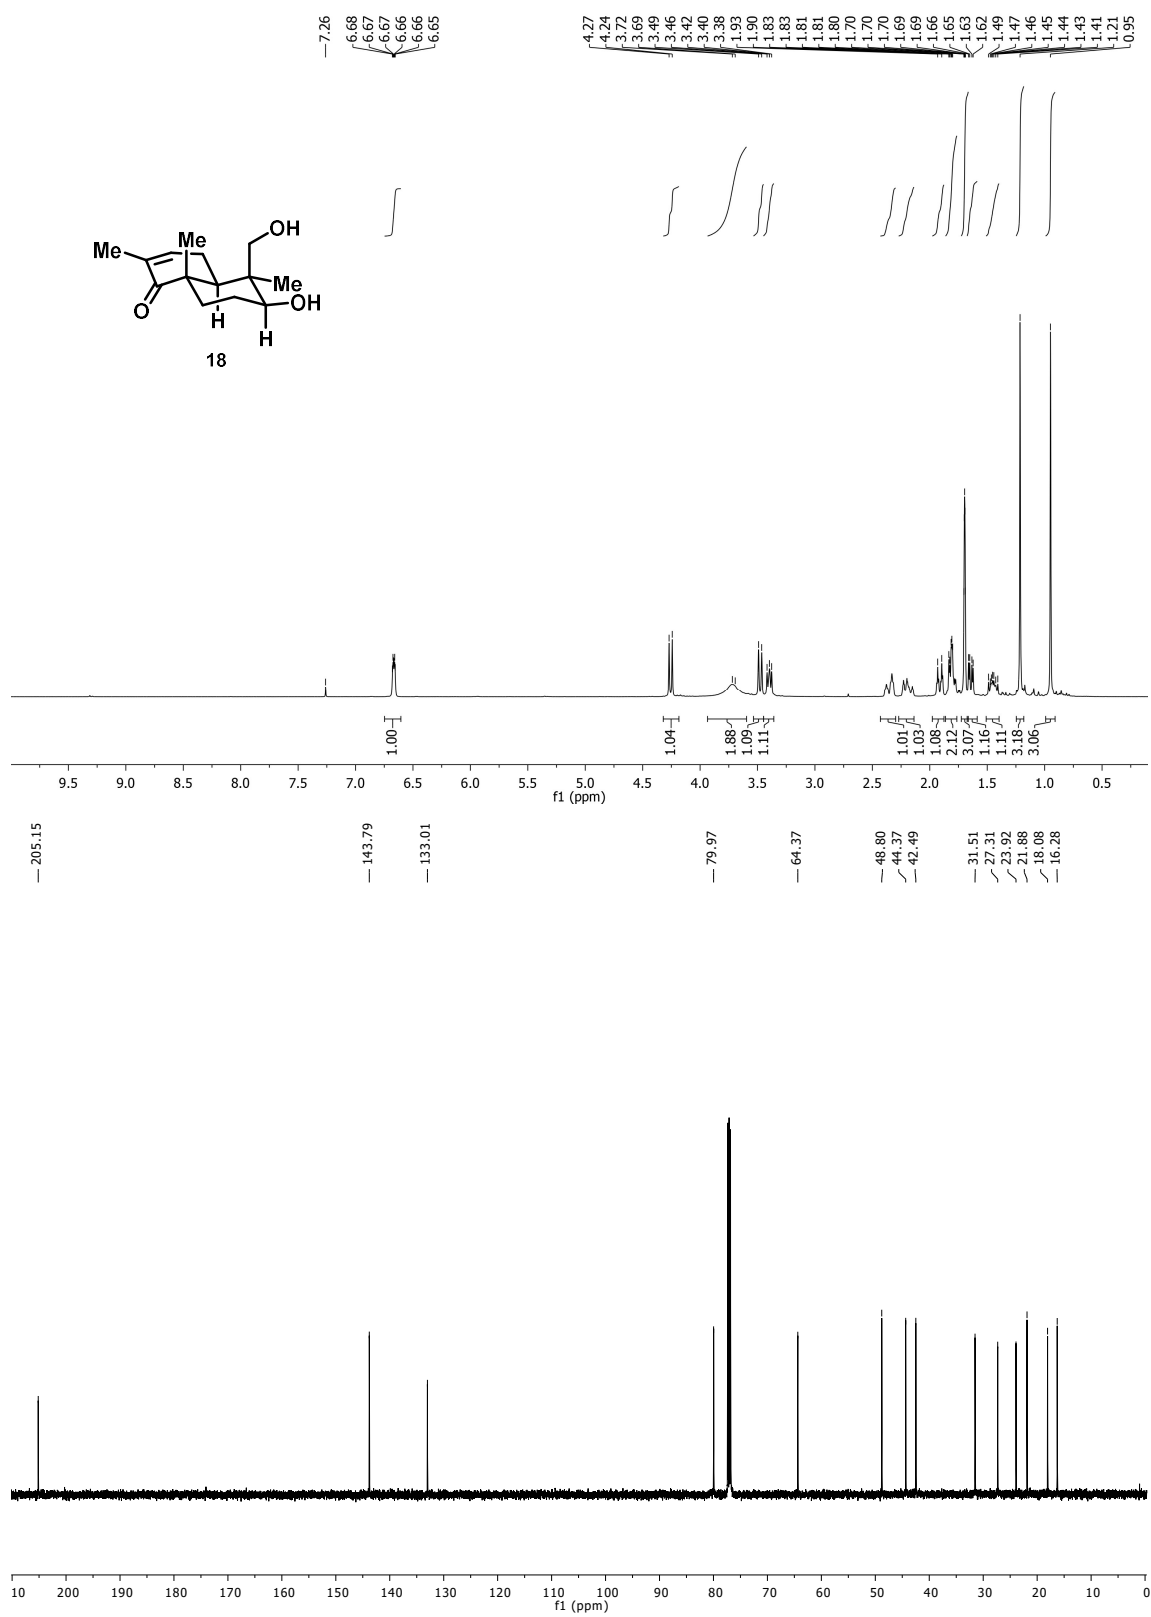

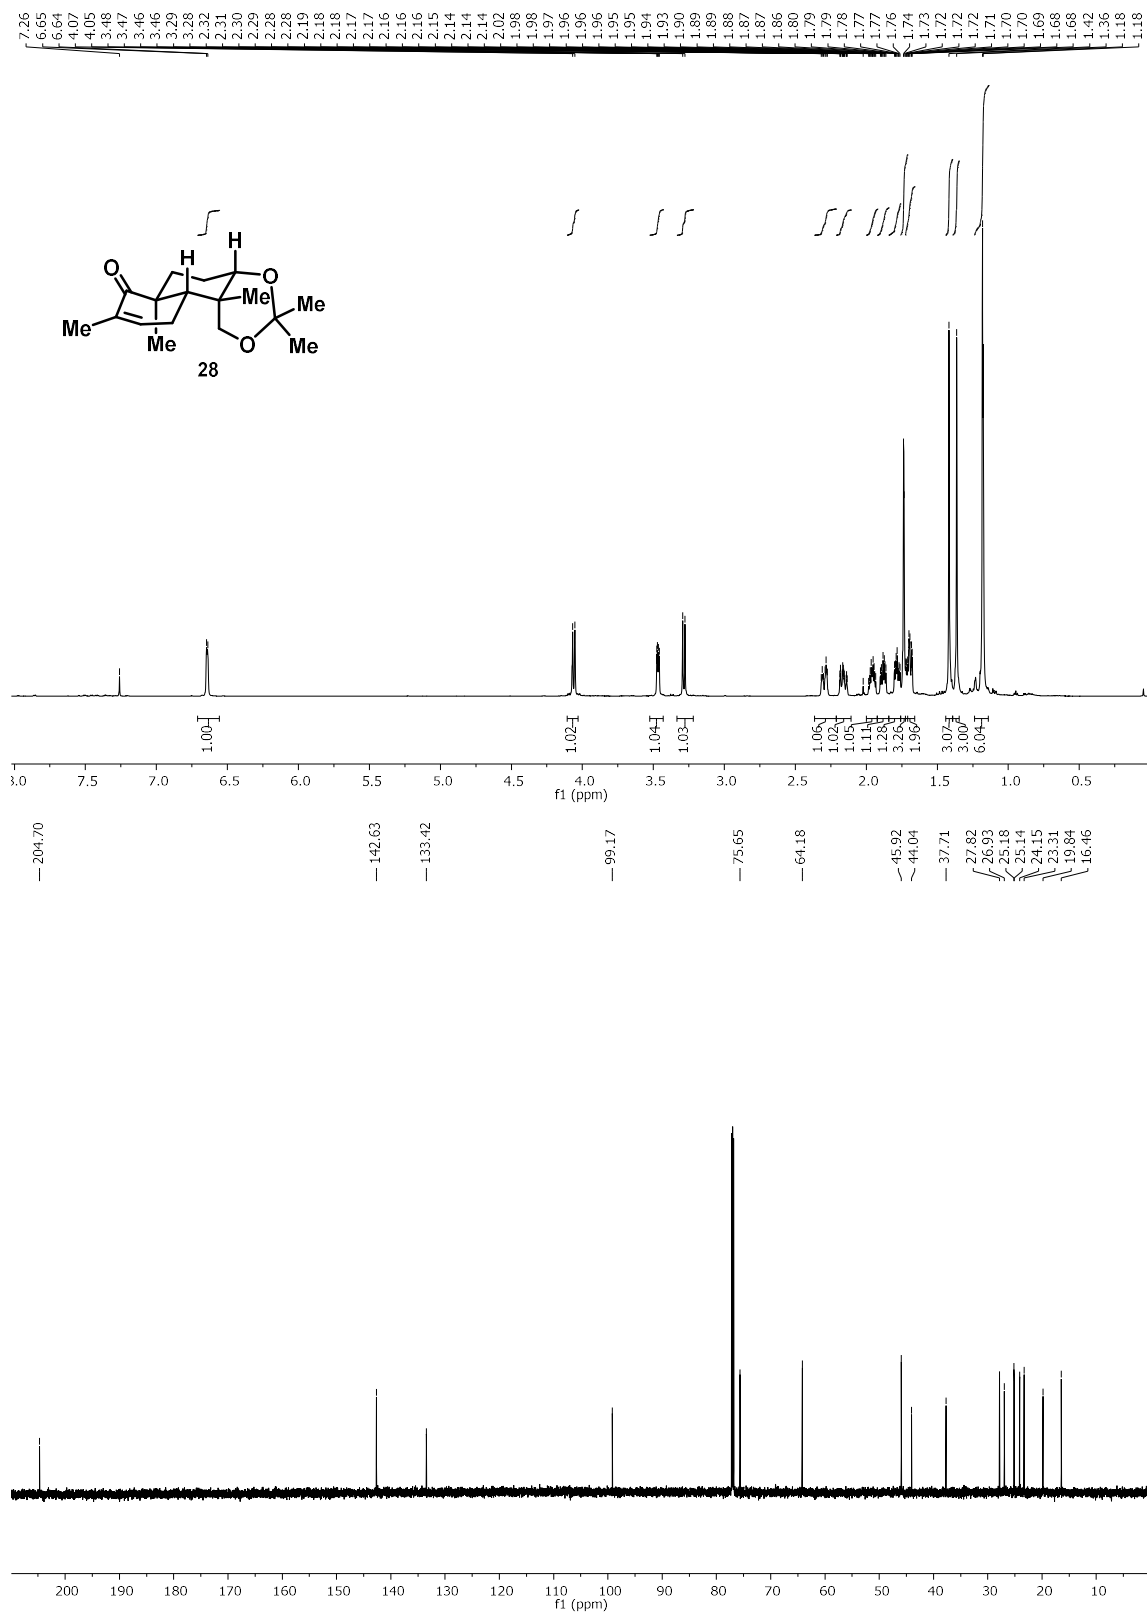

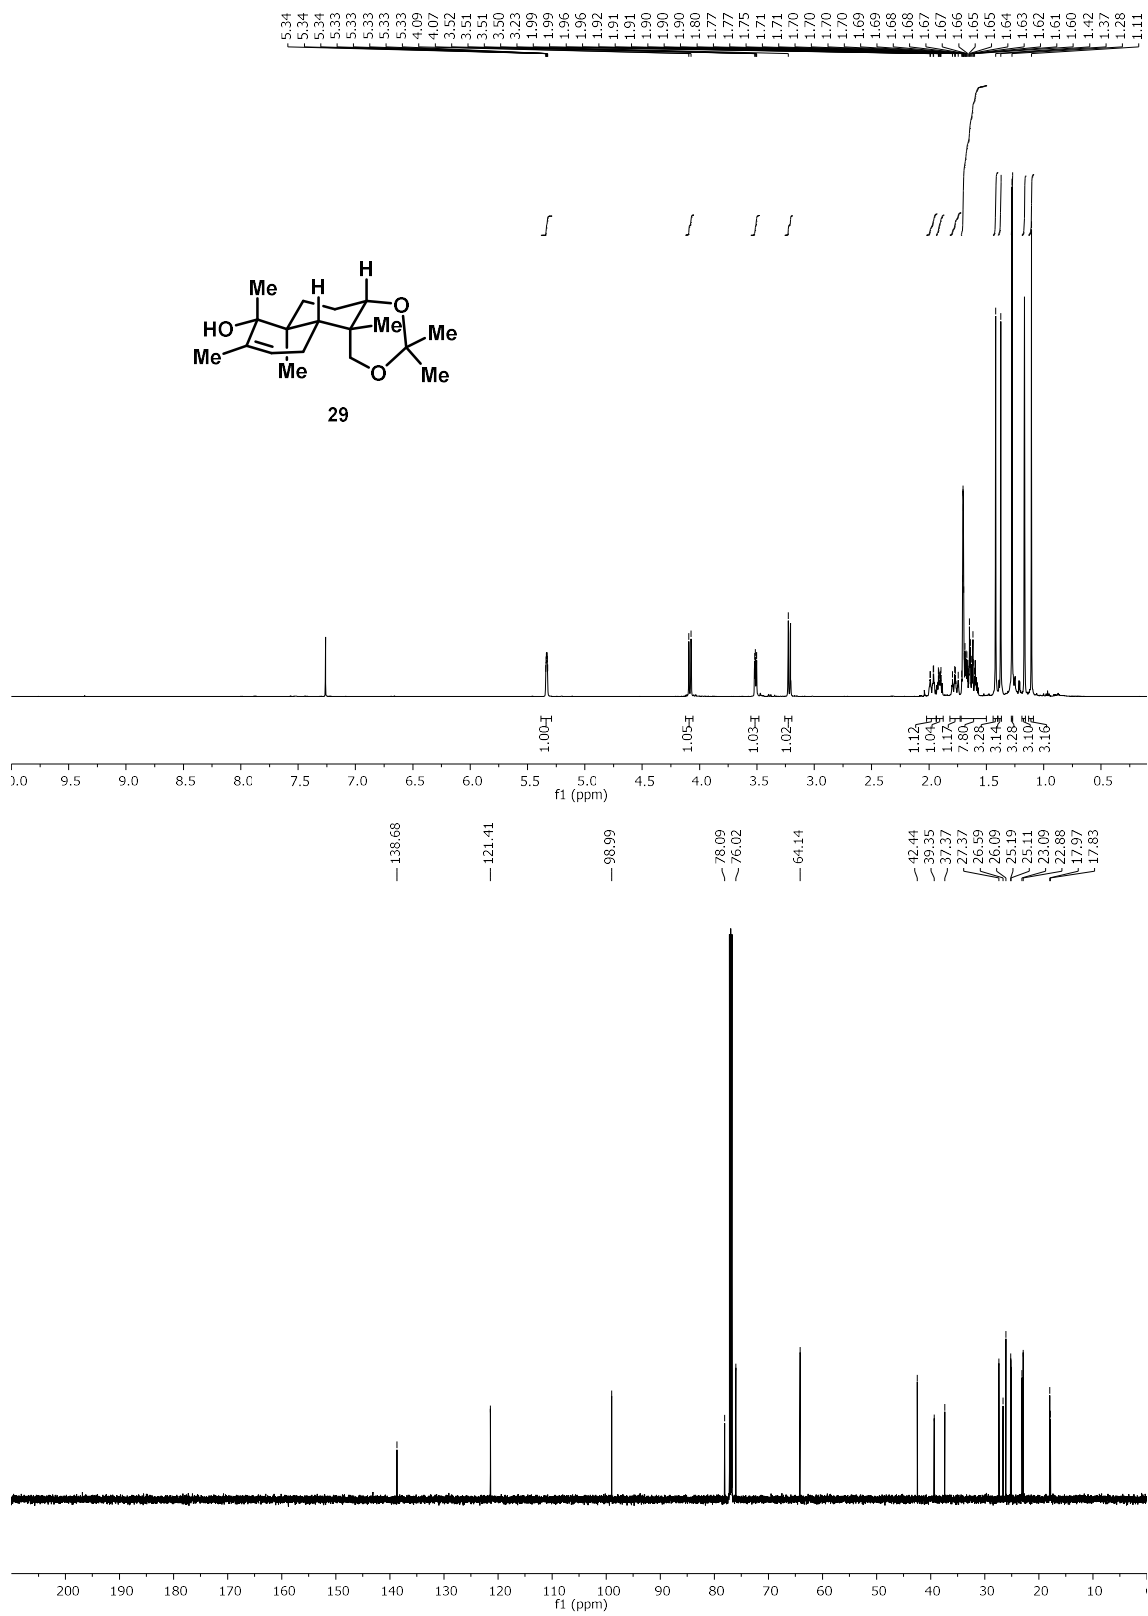



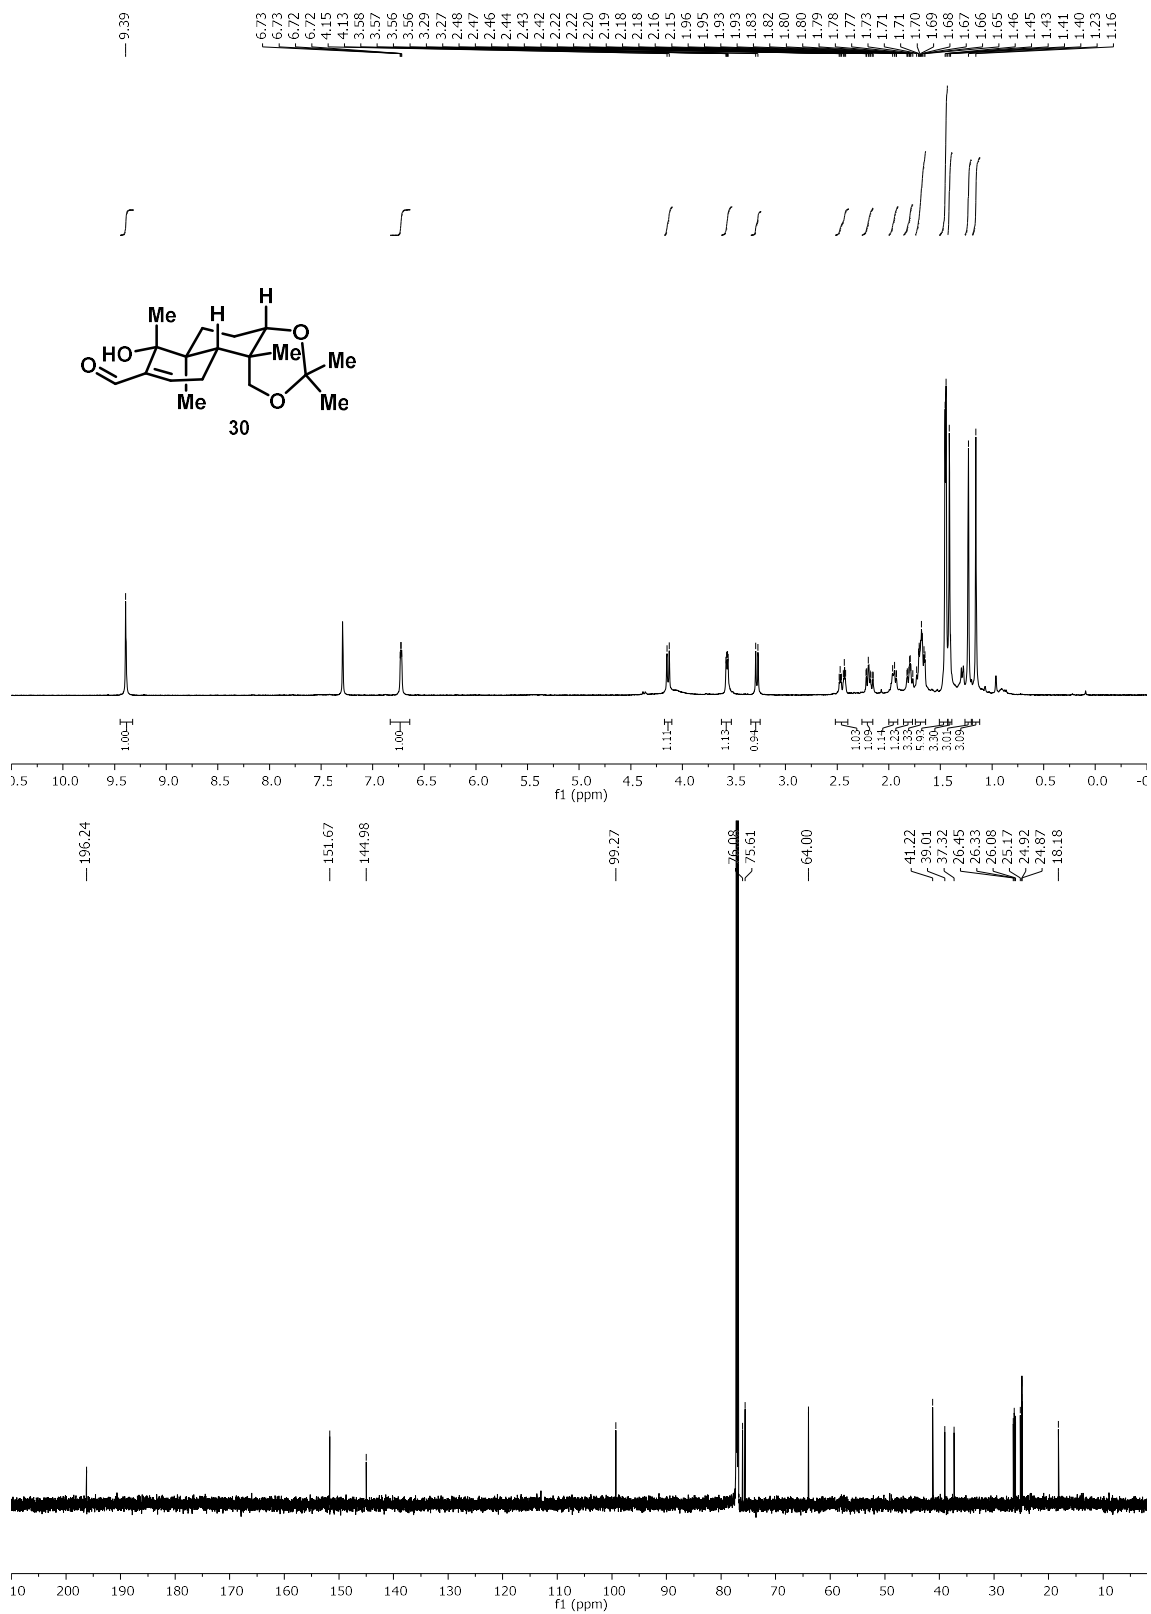

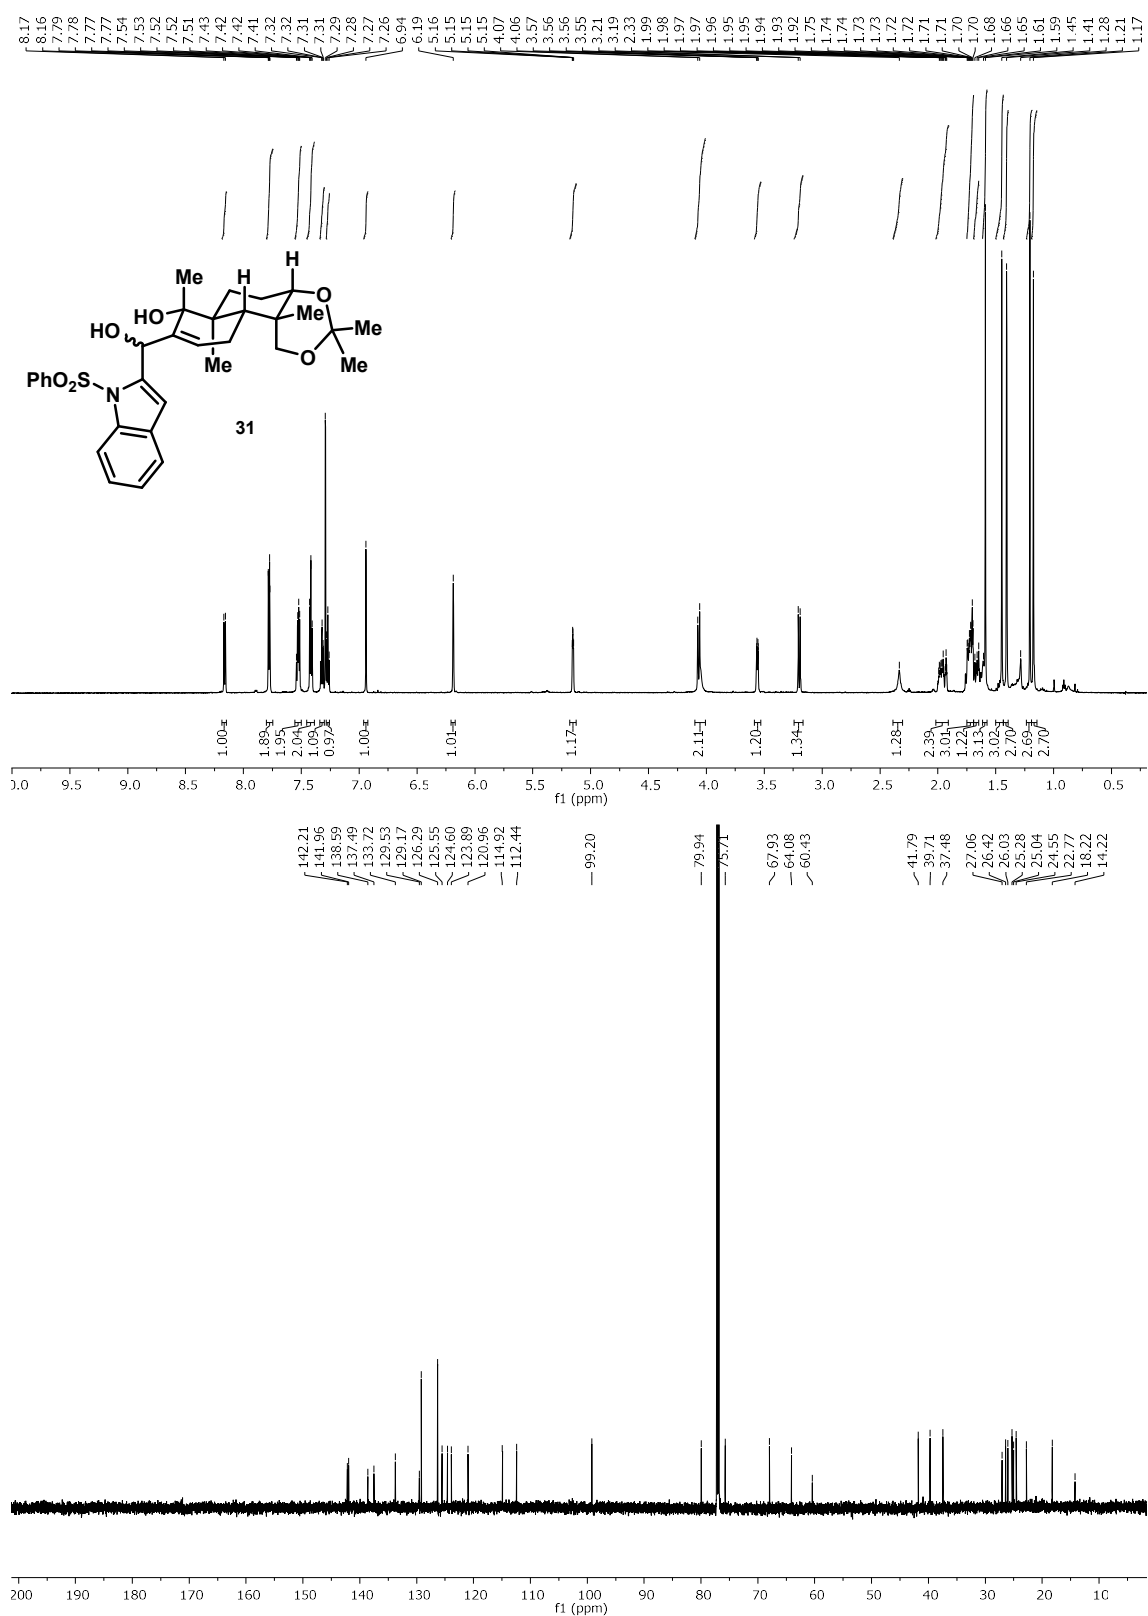

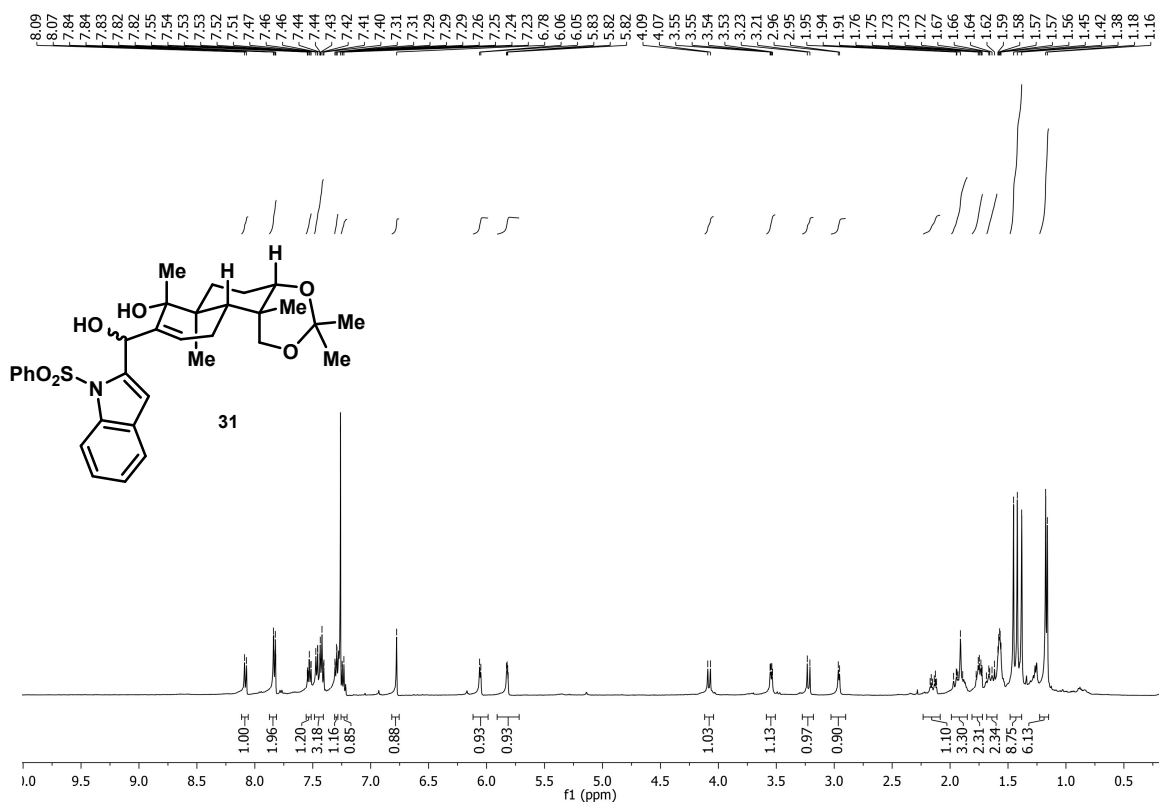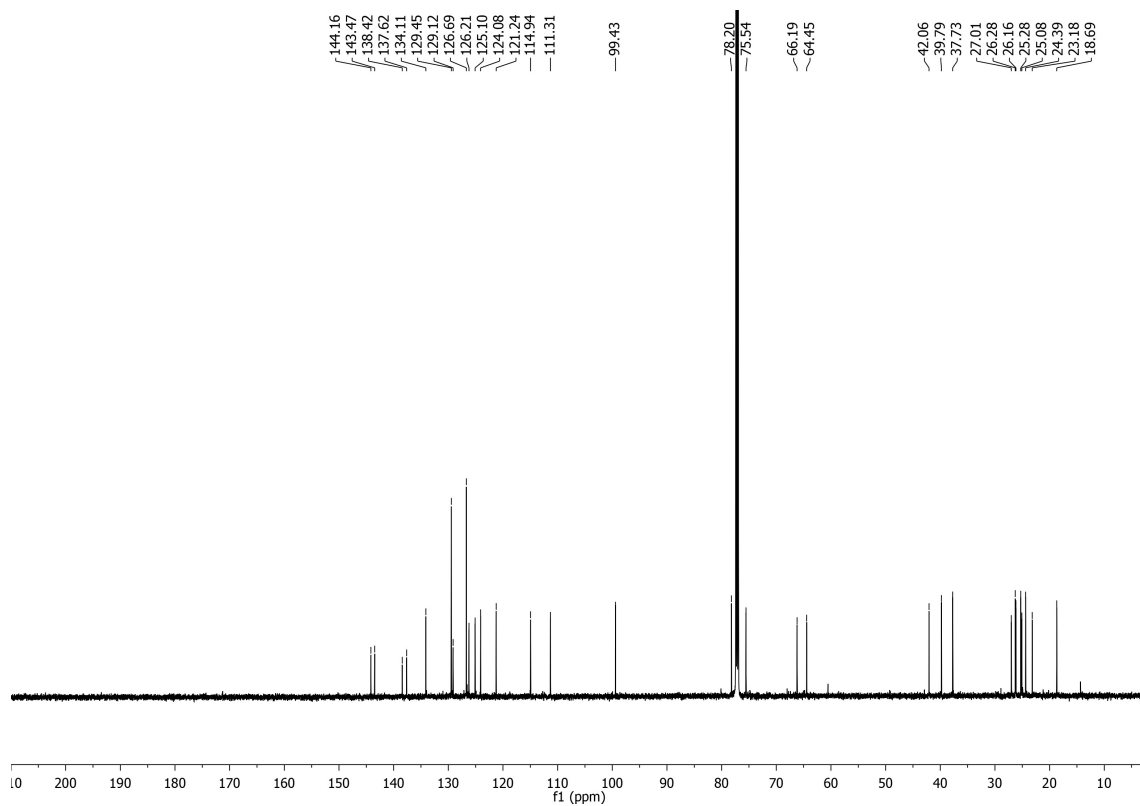

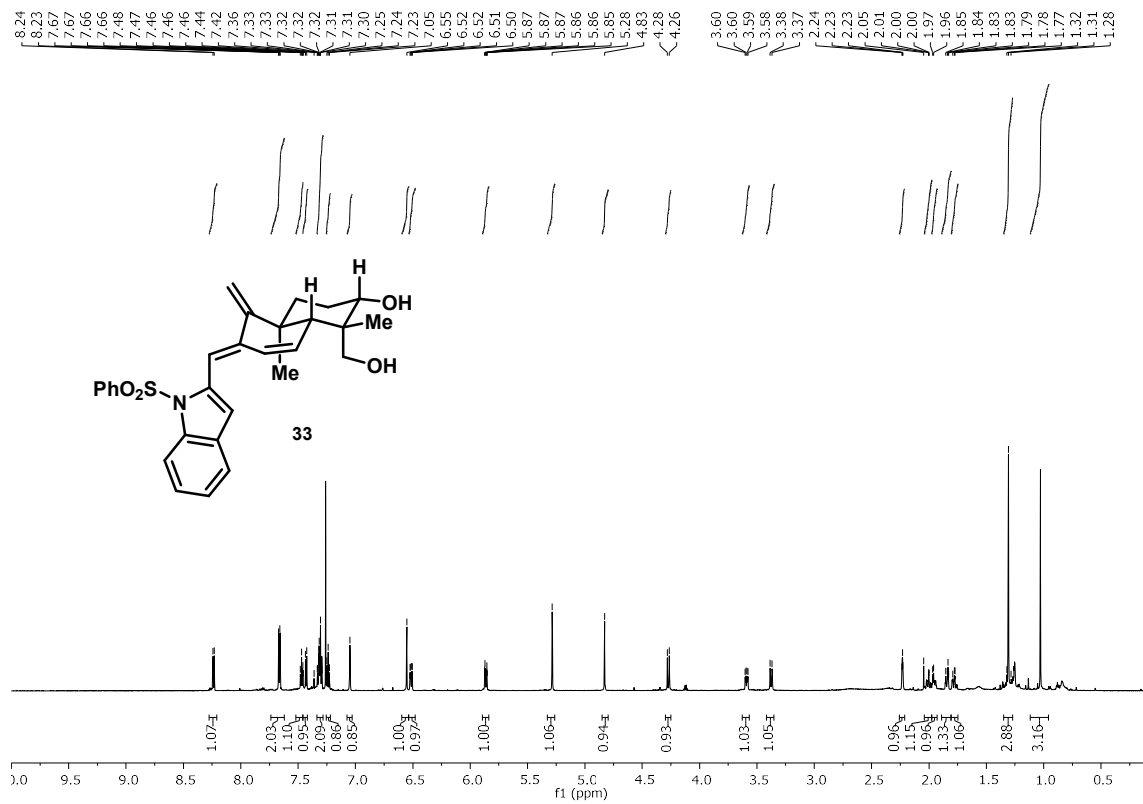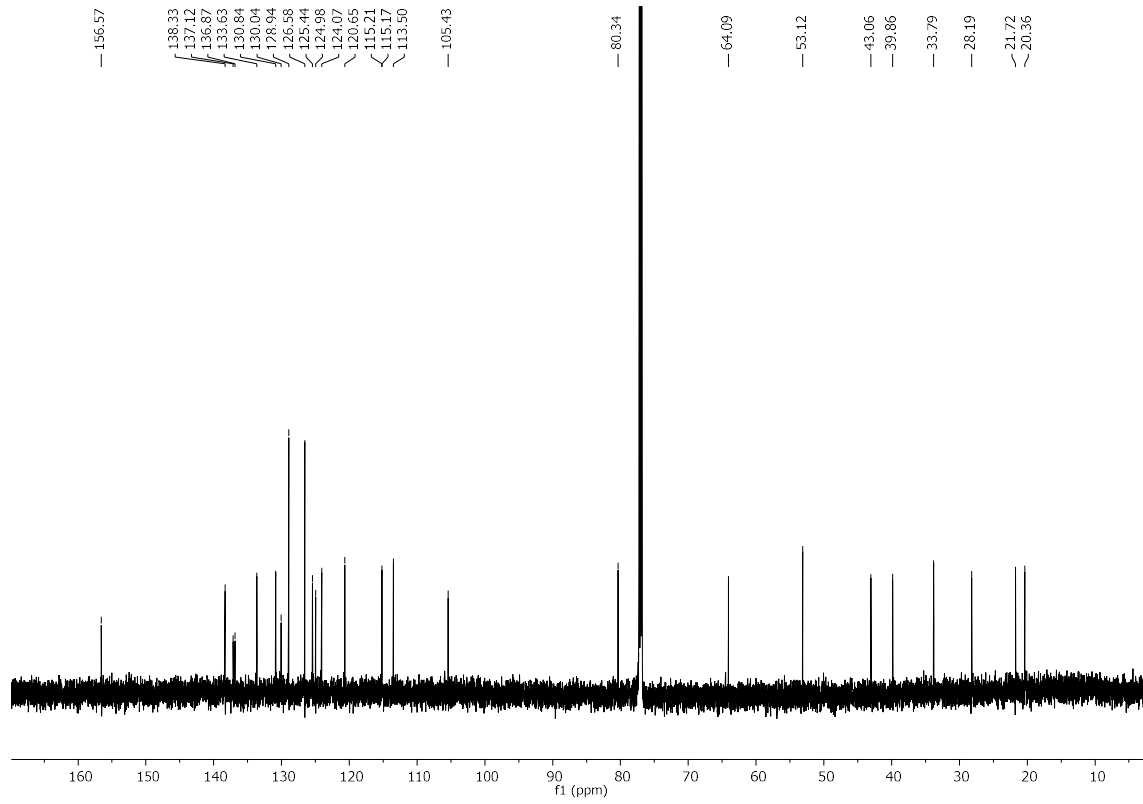

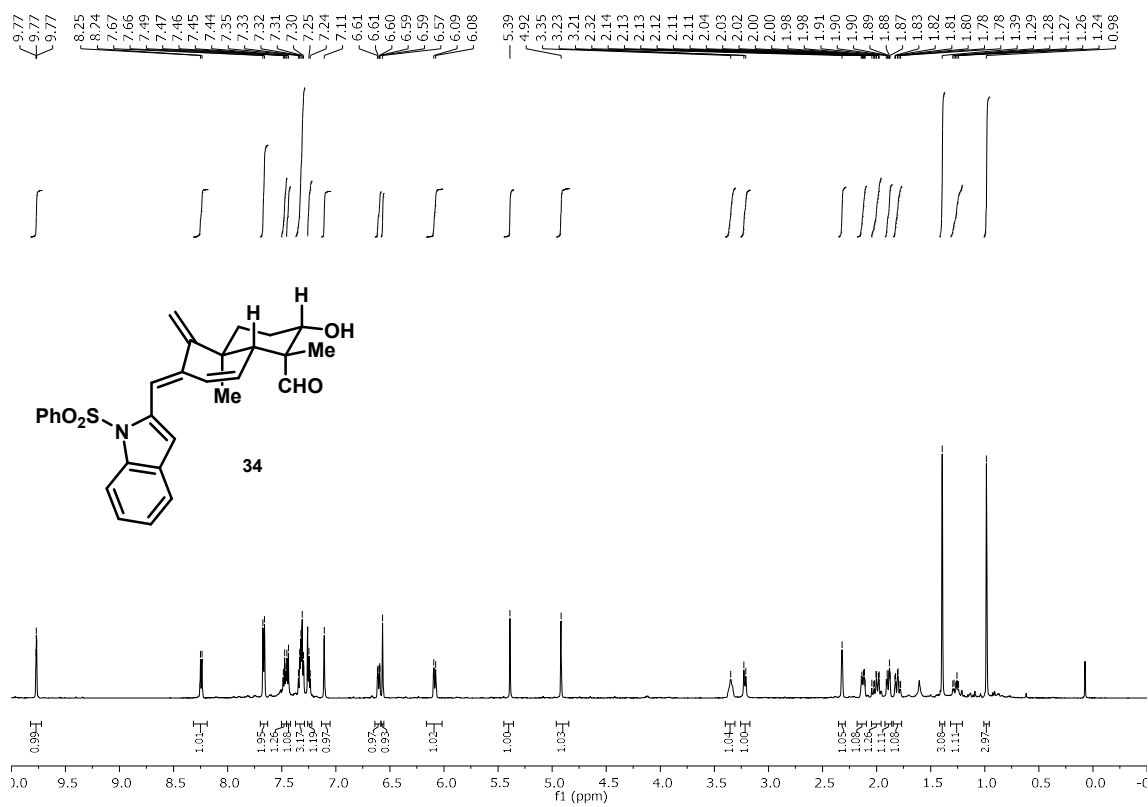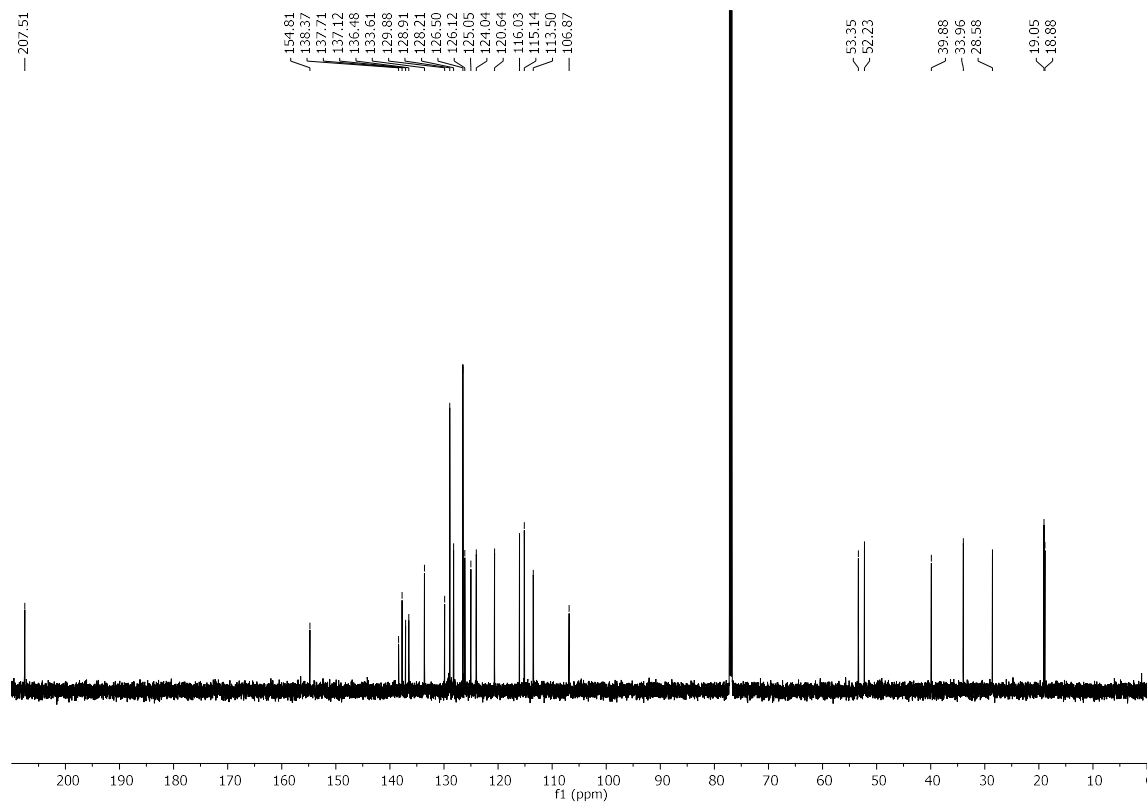

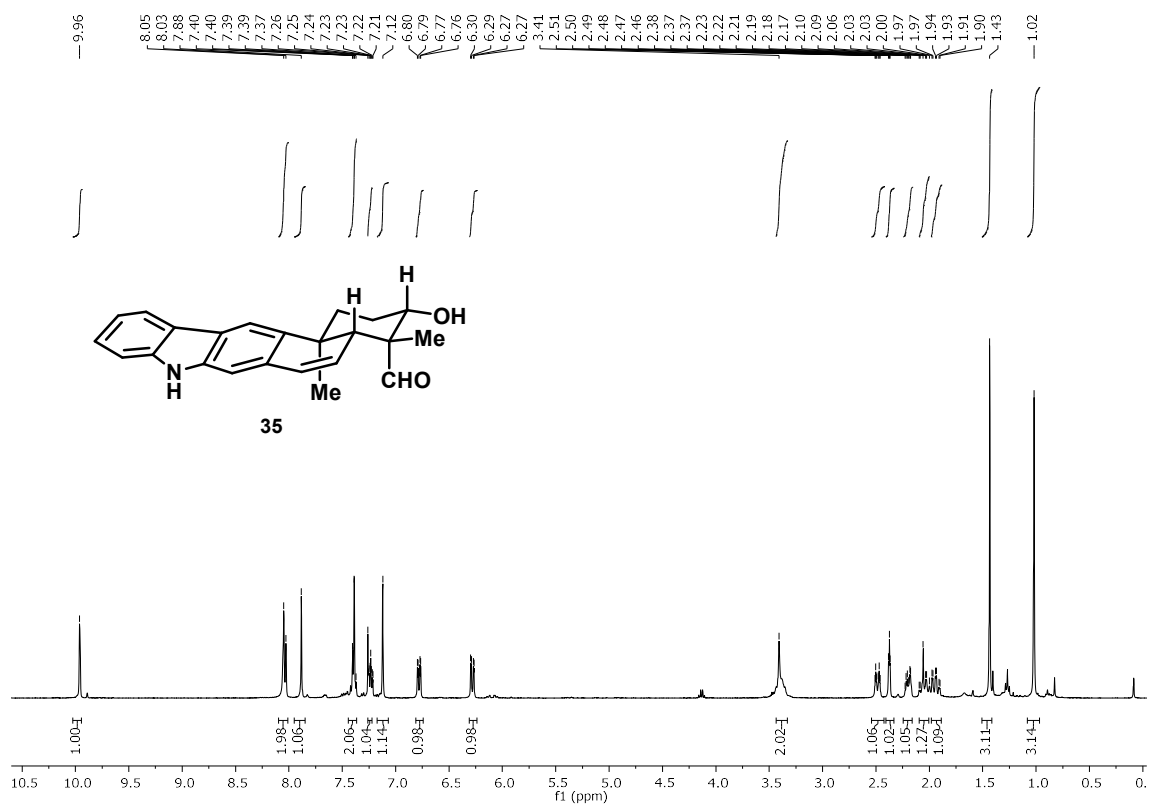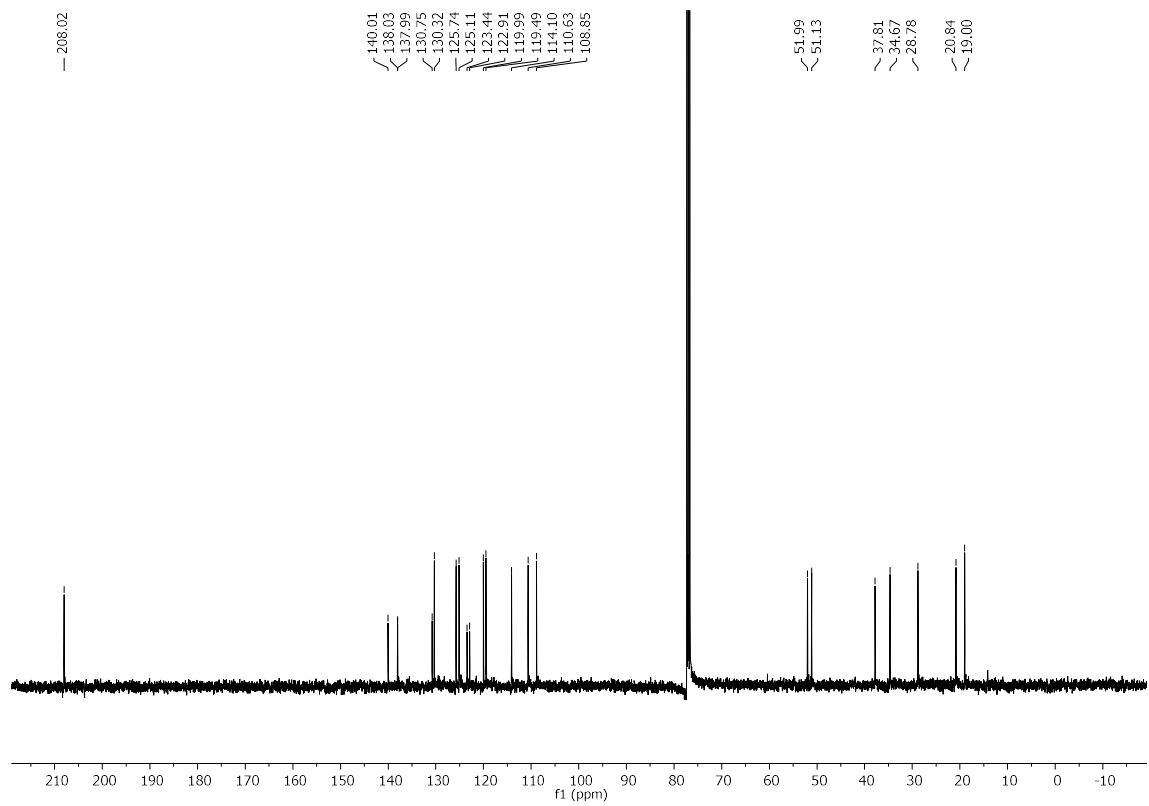

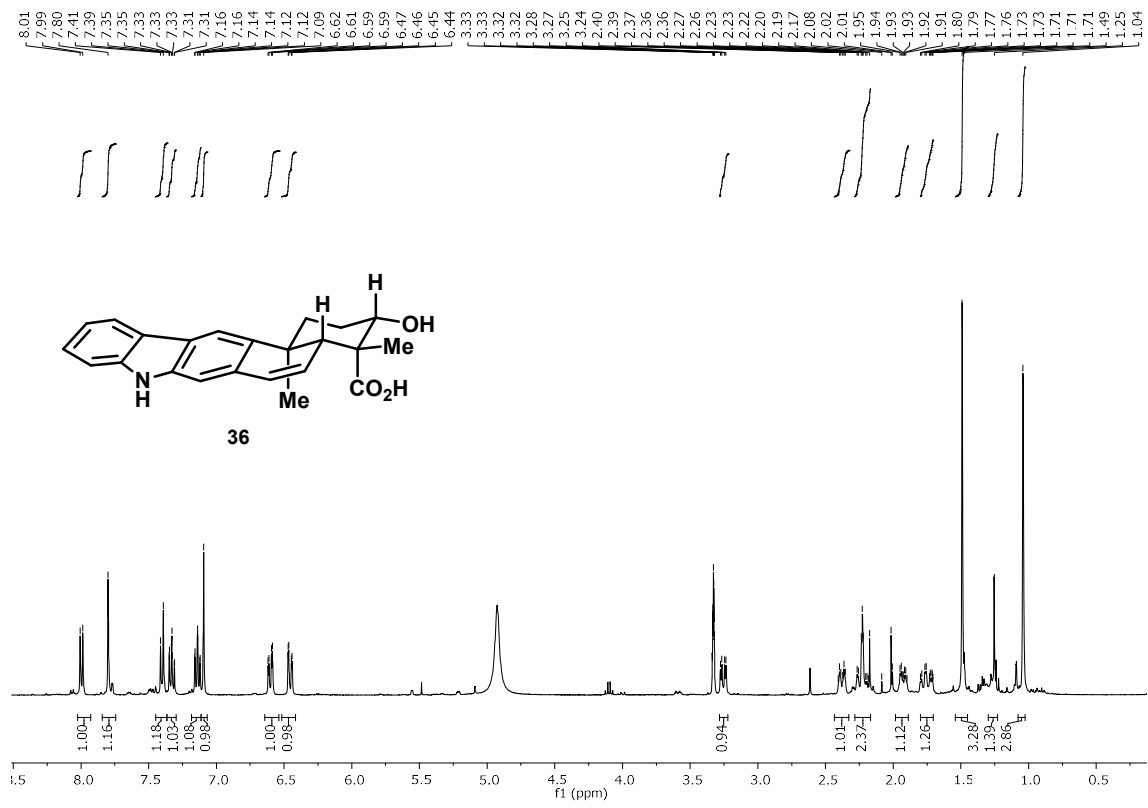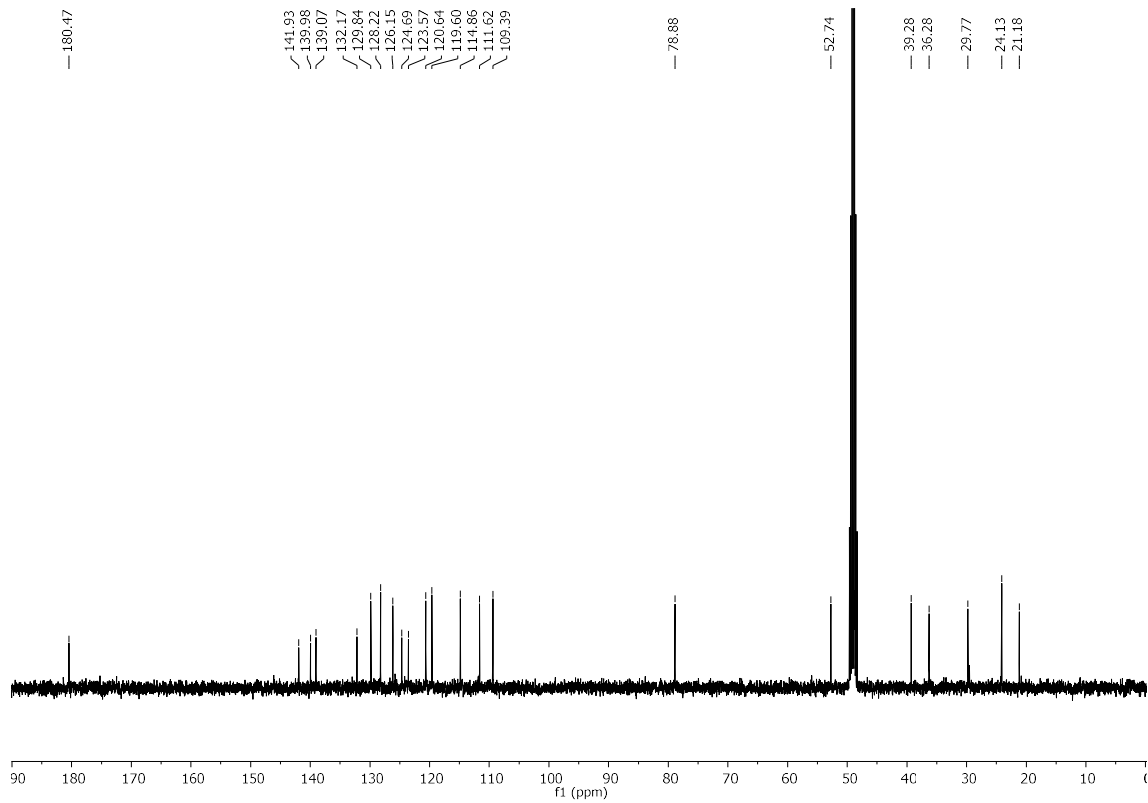

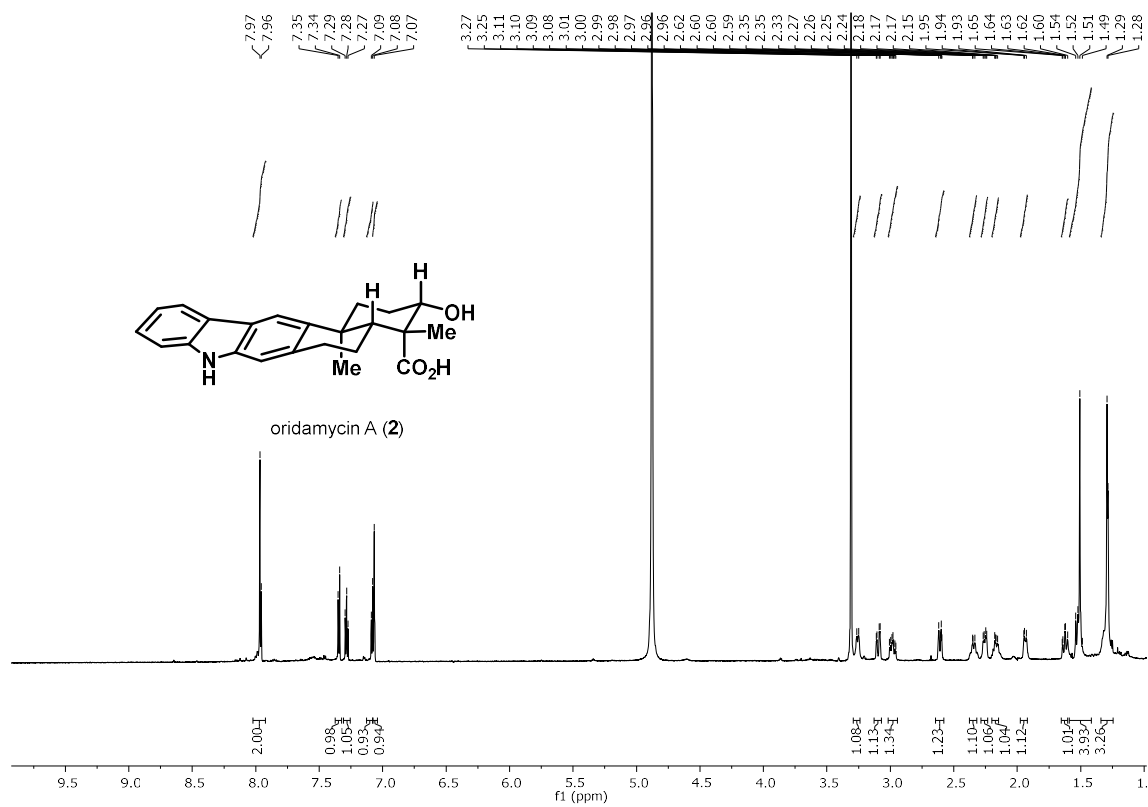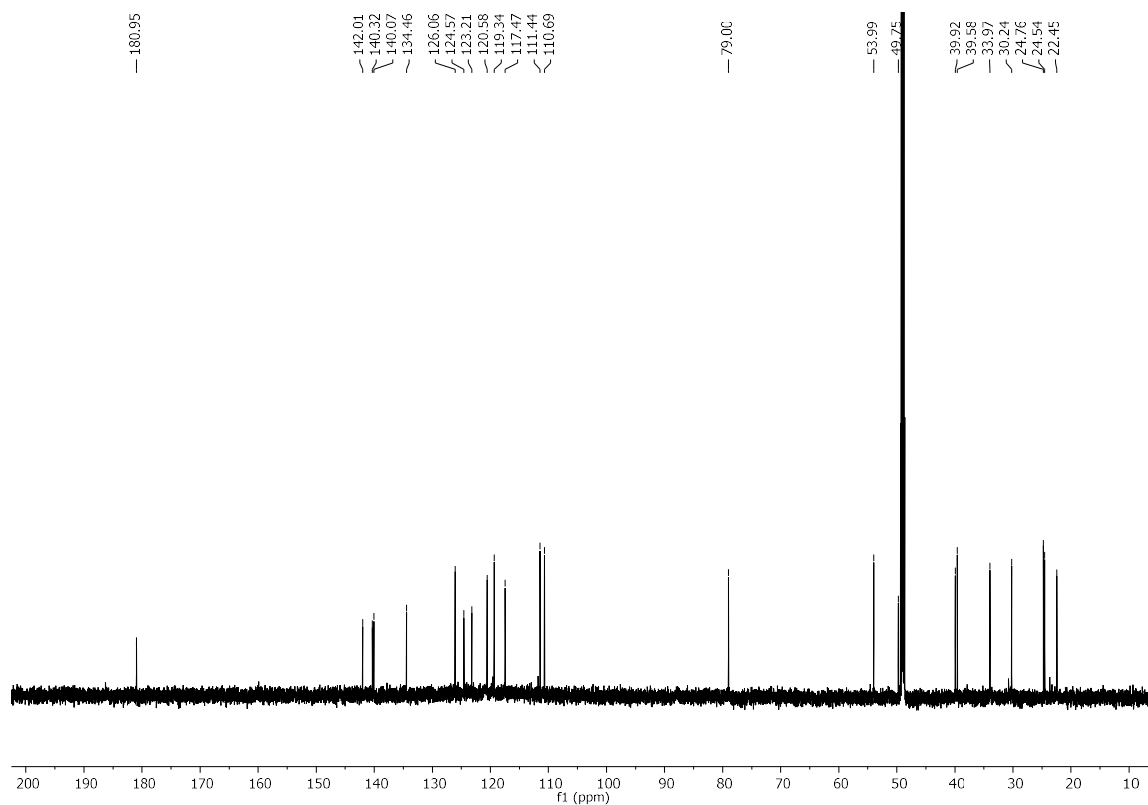

Supplement: NIHMS1047586-supplement-Supp_info.pdf [file NIHMS1047586-supplement-Supp_info.pdf]
